# Supplementary material for: Synthesis of pyrrolo[2,3- d ]pyridazines and pyrrolo[2,3- c ]pyridines (6-azaindoles). Experimental and theoretical study
Source: Royal Society of Chemistry journal article supplement (doi:10.1039/d4ob00717d), 2024-01-01
Supplement: d4ob00717d2.pdf [file d4ob00717d2.pdf]

Synthesis of pyrrolo[2,3-d]pyridazines and pyrrolo[2,3-c]pyridines (6-azaindoles). Experimental and theoretical study.

Ilya V. Efimov,<sup>\*[a]</sup> Yana V. Sultanova<sup>[b]</sup>, Alessandra Cicolella,<sup>[c]</sup> Giovanni Talarico<sup>[c,d]</sup> and Leonid G. Voskressensky<sup>[a]</sup>

<sup>[a]</sup> Research Centre: Molecular Design and Synthesis of Innovative Compounds for Medicine, Peoples' Friendship University of Russia (RUDN University), 117198, Russia, Moscow, Miklukho-Maklaya st, 6

<sup>[b]</sup> Department of Chemistry, Lomonosov Moscow State University, 119991 Moscow, Russia

<sup>[c]</sup> Scuola Superiore Meridionale, Largo San Marcellino, 80138, Naples, Italy

<sup>[d]</sup> Dipartimento di Scienze Chimiche, Università degli Studi di Napoli Federico II, Napoli, Italy

[efimov\\_iv@rudn.ru](mailto:efimov_iv@rudn.ru)

## Supporting information

|                                                                               |    |
|-------------------------------------------------------------------------------|----|
| <b>1. General information</b> .....                                           | 2  |
| <b>2. General procedure for the synthesis of the starting materials</b> ..... | 2  |
| <b>3. NMR</b> .....                                                           | 5  |
| <b>4. Computational Details</b> .....                                         | 27 |
| <b>5. Additional Figures</b> .....                                            | 27 |
| <b>6. Cartesian Coordinates</b> .....                                         | 31 |

## 1. General information

Starting reagents were purchased from commercial sources and were used without any additional purification or were prepared according to literature procedures.  $^1\text{H}$  and  $^{13}\text{C}$  spectra were acquired on a Bruker Avance Neo 700 spectrometer (with operating frequencies of 700 and 176 respectively) and Jeol JNM-ECA 600 spectrometer (with operating frequencies of 600 and 150 respectively) at room temperature and referenced to the residual signals of the solvent. The solvents used for NMR was  $\text{DMSO-}d_6$ . Coupling constants are reported in Hertz ( $J/\text{Hz}$ ). The peak patterns are indicated as follows: s, singlet; d, doublet; t, triplet; q, quadruplet; m, multiplet; dd, doublet of doublets and br s, broad singlet. The wavelengths are reported in reciprocal centimeters ( $\nu_{\text{max}}/\text{cm}^{-1}$ ). HRMS spectra were recorded on a tandem quadrupole time-of-flight (QTOF) accurate mass detector (Agilent 6545 Q-TOF LC/MS; Agilent Technologies, USA). The reaction progress was monitored by TLC and the spots were visualized under UV light (254 or 365 nm). Melting points (not corrected) were determined on a SMP-10 apparatus. Solvents were distilled and dried according to standard procedures. All microwave irradiation experiments were carried out using CEM-Discover, operating at a frequency of 2.45 GHz with continuous irradiation power from 0 to 300W. The reactions were carried out in 10 mL snap-cap glass vials. The temperature was measured with an IR sensor on the outer surface of the process vial. The reaction vessel is cooled rapidly (60-120s) to ambient temperature by gas jet cooling after the irradiation period.

## 2. General procedure for the synthesis of the starting materials

### General procedure for the synthesis of 4-arylpyrroles **1a-j**.

A 50 mL round-bottom flask equipped with a magnetic stirring bar was charged with mixture of enaminone (10 mmol) and of *tert*-BuOK (20 mmol) and 10 ml of anhydrous DMF. The mixture was stirred until all substrates to be completely dissolved on the ice-water bath. Than to the prepared mixture at  $0\text{ }^\circ\text{C}$  appropriate isocyanide (20 mmol) was added. After 1 min the mixture was quenched with 25 mL of 10% solution of HCl. After 2 hours the formed precipitate was filtered off and dried on air to give final product. The protocols for preparation of 4-arylpyrroles were also reported previously.<sup>[S1]</sup> The structure of all used pyrroles are presented below (Figure 1).

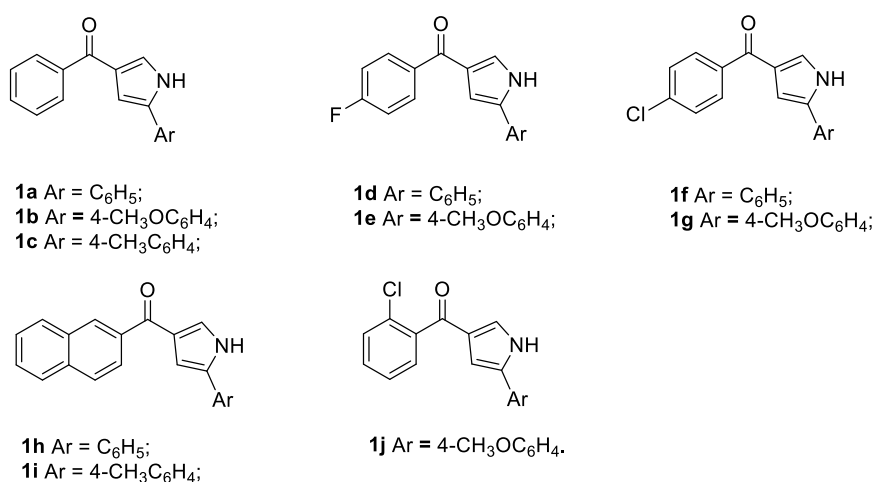

Figure 1. Scope of used pyrroles.

General procedure for formylation of 4-arylpyrroles (GP1).

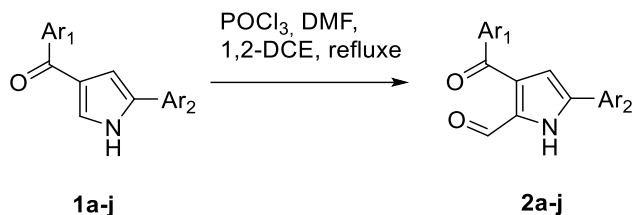

Scheme 1. Formylation of 4-arylpyrroles

A 50 mL round-bottom flask equipped with a magnetic stirring bar was charged 10 mL of 1,2-DCE and pyrrole **1a** (247.3 mg, 1.0 mmol, 1 equiv). Then solution of *N,N*-dimethylformamide (109.6 mg, 1.5 mmol, 1.5 equiv),  $\text{POCl}_3$  (230 mg, 1.5 mmol, 1.5 equiv) in 10 mL of 1,2-DCE was added dropwise, and the reaction mixture was refluxed until the reaction was judged to be completed by thin-layer chromatography (TLC; hexane/ethyl acetate = 5/1) analysis (around 1 hour). Then the reaction mixture was cooled to room temperature and all volatiles were evaporated. The product was purified by column chromatography (hexane/ethyl acetate = 10/1).

General procedure for the synthesis of pyrrolo[2,3-*d*]pyridazines (GP2).

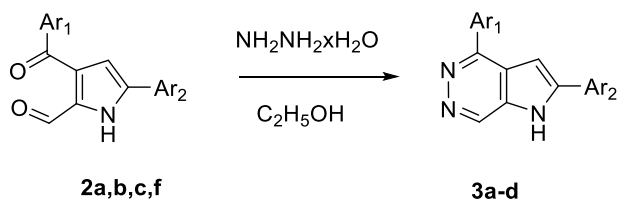

Scheme 2. Preparation of pyrrolo[2,3-*d*]pyridazines

A 50 mL round-bottom flask equipped with a magnetic stirring bar was charged with 1*H*-pyrrole-2-carbaldehyde (275.3 mg, 1.0 mmol, 1 equiv), 10 mL of ethanol and hydrazine hydrate (100 mg, 2 mmol, 2 equiv.). The reaction mixture was stirred overnight and formed precipitate was filtered off and dried on air.

General procedure for the synthesis of pyrrolo[2,3-*d*]pyridazin-5-ium chlorides (GP3).

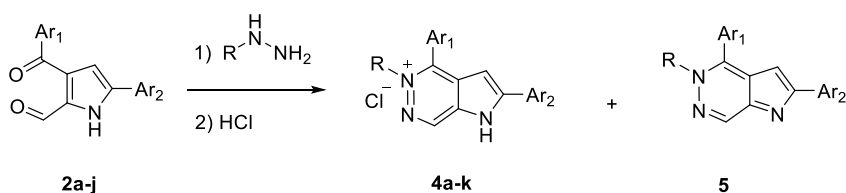

Scheme 3. Preparation of pyrrolo[2,3-*d*]pyridazin-5-ium chlorides

A 50 mL round-bottom flask equipped with a magnetic stirring bar was charged with 1*H*-pyrrole-2-carbaldehyde (275.3 mg, 1.0 mmol, 1 equiv), 10 mL of ethanol and phenyl hydrazine (108 mg, 1.1 mmol, 1.1 equiv.). The reaction mixture was stirred overnight. The reaction progress was monitored by TLC (hexane/ethyl acetate = 2/1). After completion 50  $\mu\text{L}$  of  $\text{HCl}^{\text{conc}}$  was added and reaction mixture was refluxed until the reaction was judged to be completed by TLC (hexane/ethyl acetate = 5/1) analysis (around 1-6 hours). Then the reaction mixture was cooled to room temperature and all volatiles were evaporated. The product was purified by flash chromatography (hexane/ethyl acetate = 1/1).

General procedure for the synthesis of pyrrolo[2,3-*d*]pyridines (6-azaindoles) (GP4).

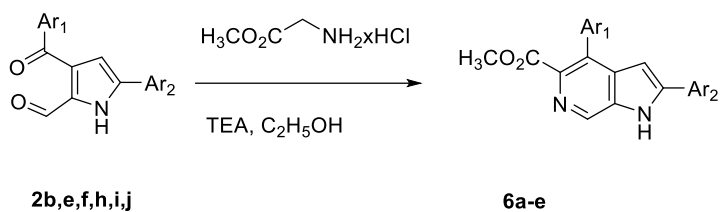

Scheme 4. Preparation of *pyrrolo[2,3-d]pyridines (6-azaindoles)*

A 50 mL round-bottom flask equipped with a magnetic stirring bar was charged with 1*H*-pyrrole-2-carbaldehyde (275.3 mg, 1.0 mmol, 1 equiv), methyl 2-aminoacetate hydrochloride (138 mg, 1.1 mmol, 1.1 equiv.), trimethylamine (153  $\mu\text{L}$ , 1.1 mmol, 1.1 equiv.) and 10 mL ethanol. The reaction mixture was refluxed until the reaction was judged to be completed by TLC (hexane/ethyl acetate = 3/2) analysis (around 6 hours). Then the reaction mixture was cooled to room temperature, all volatiles were evaporated and 10 mL of  $\text{H}_2\text{O}$  was added. The reaction mixture was stirred around 30 minutes and formed precipitate was filtered off and dried on air.

### 3. NMR

#### 3a <sup>1</sup>H NMR

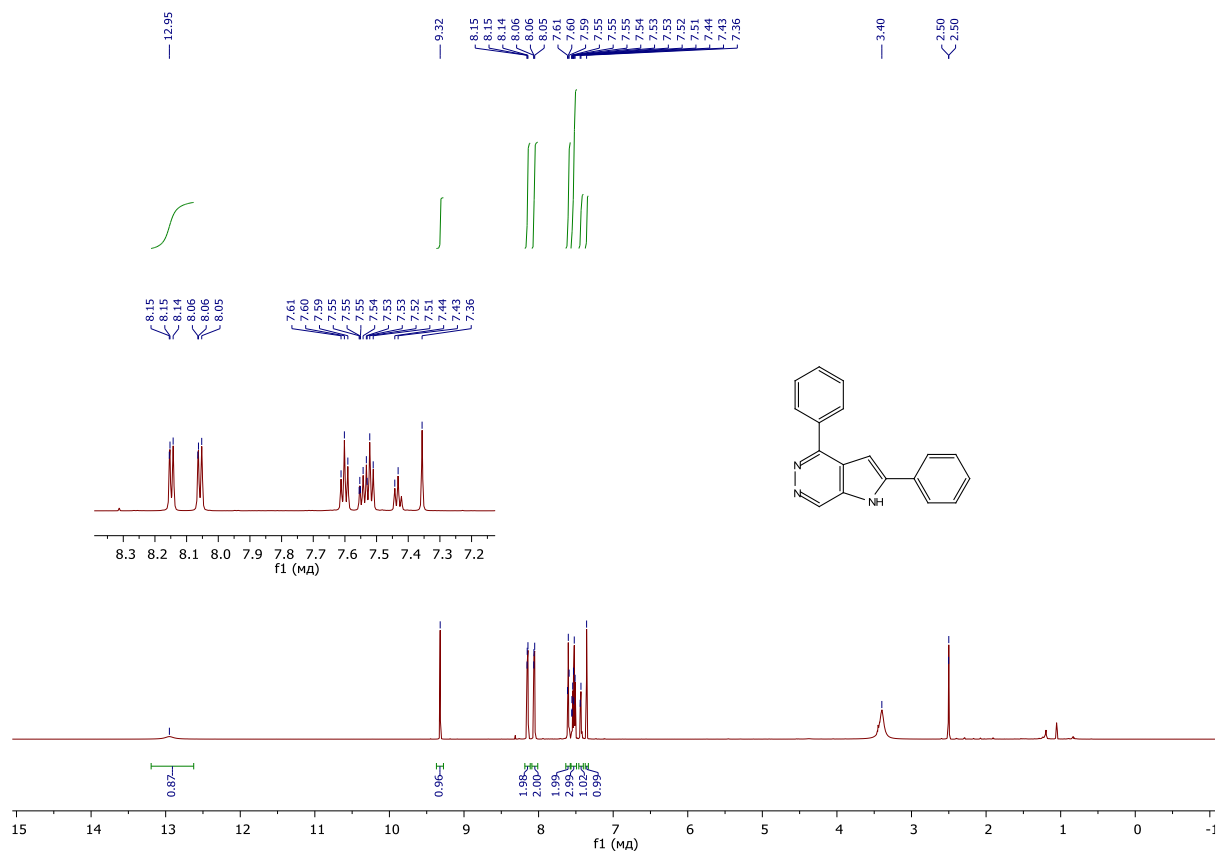

#### 3a <sup>13</sup>C NMR

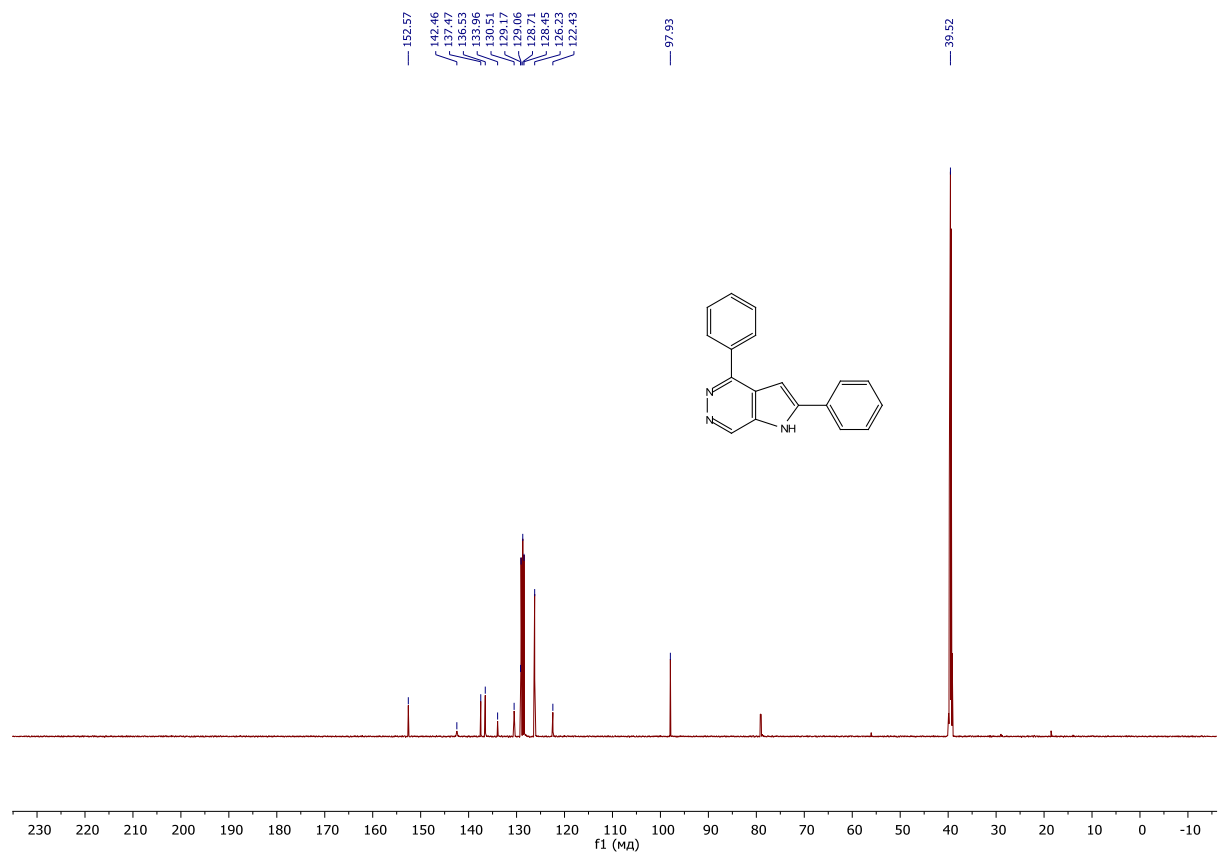

### 3b <sup>1</sup>H NMR

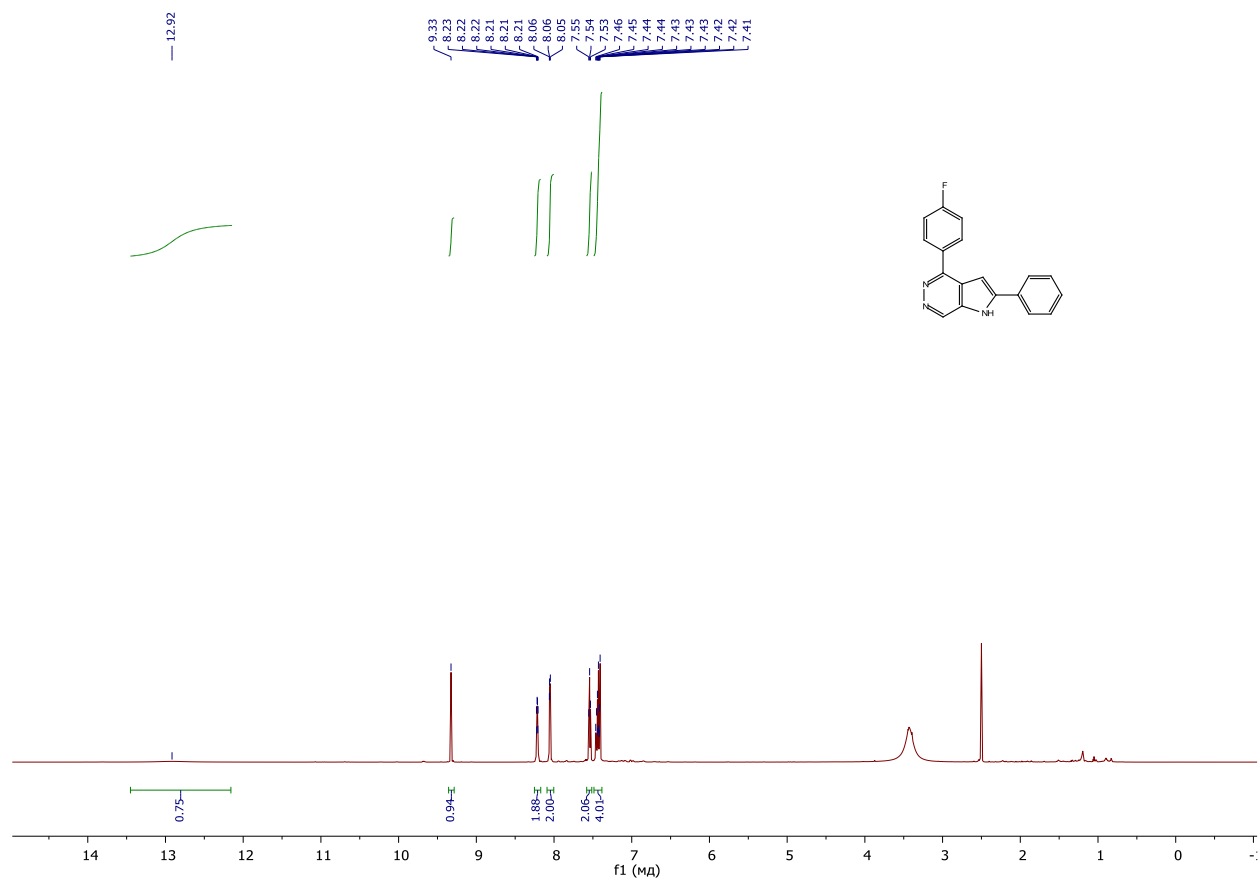

### 3b <sup>13</sup>C NMR

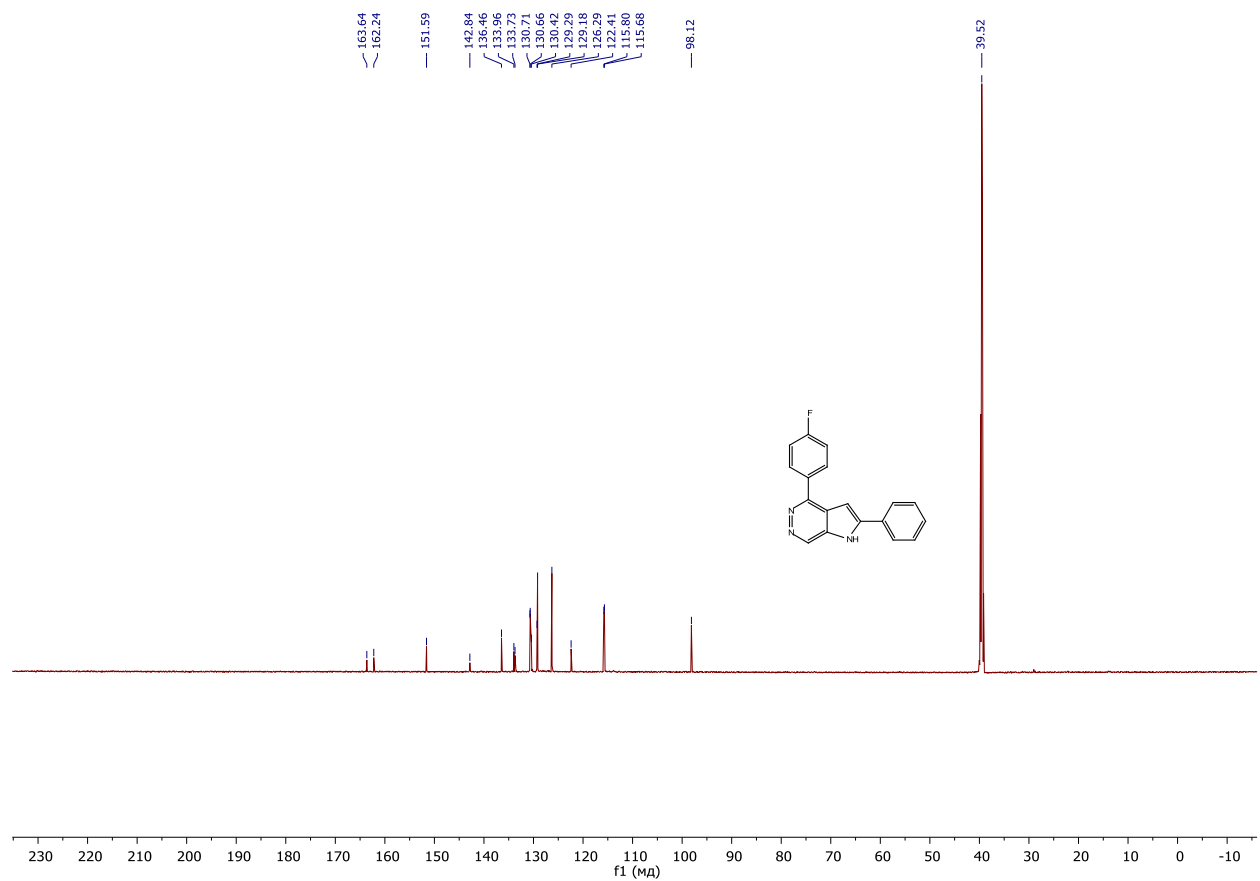

### 3c <sup>1</sup>H NMR

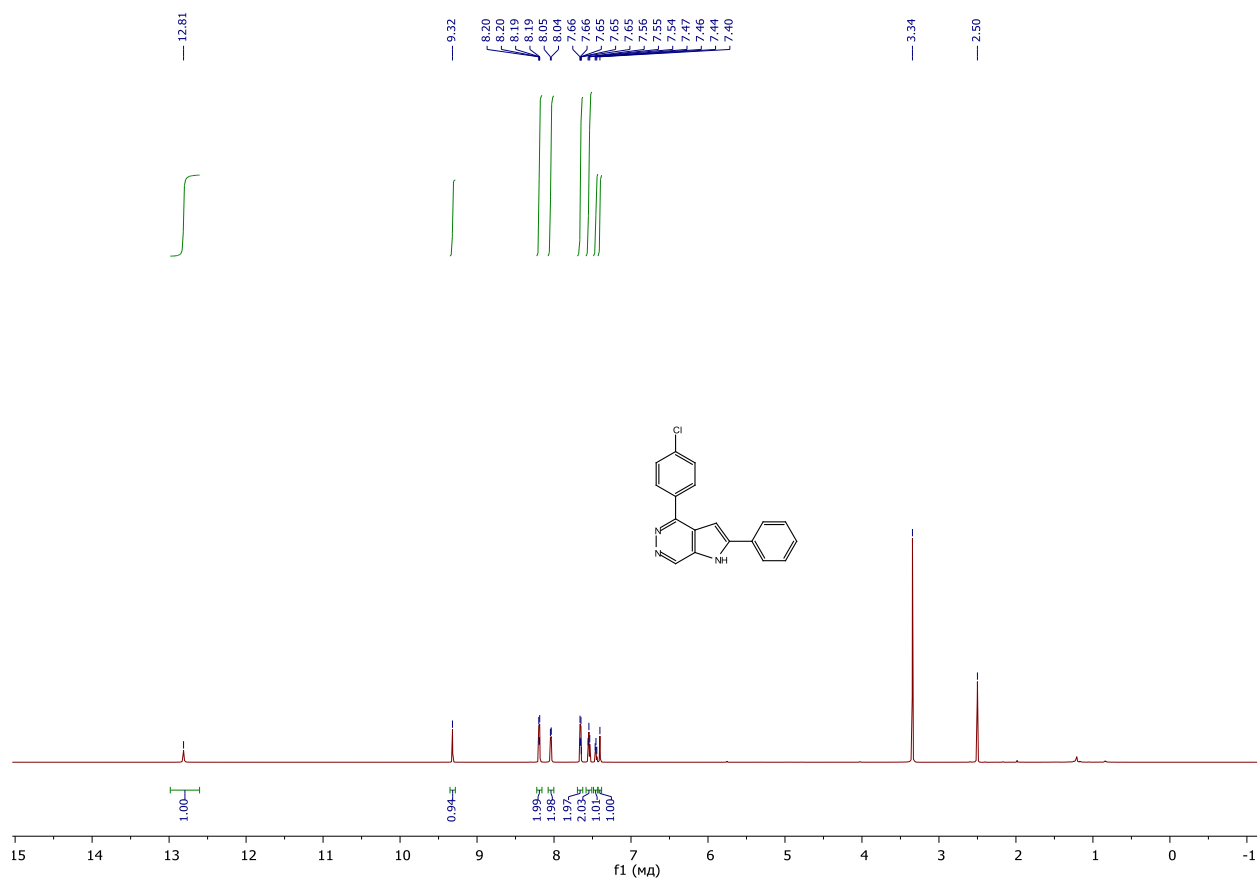

### 3c <sup>13</sup>C NMR

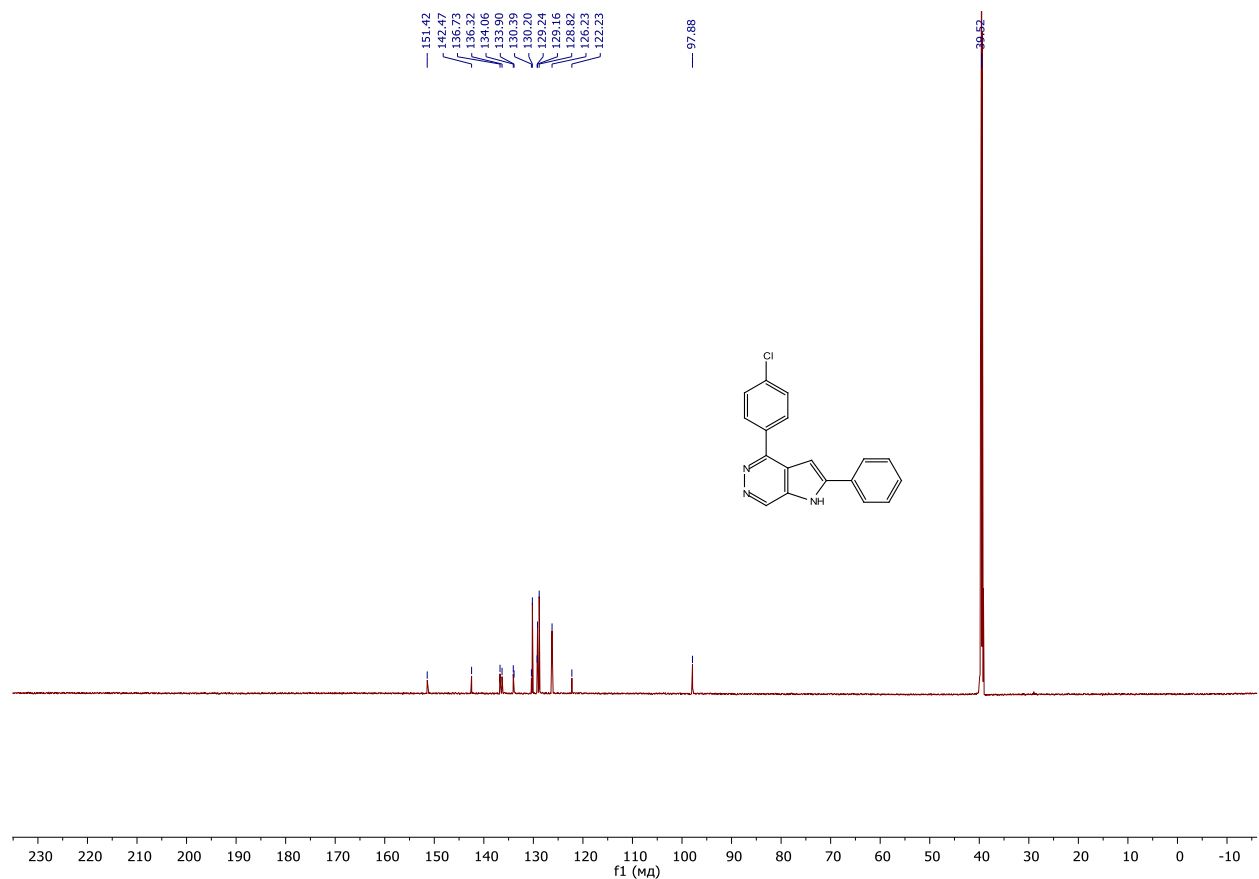

### 3d <sup>1</sup>H NMR

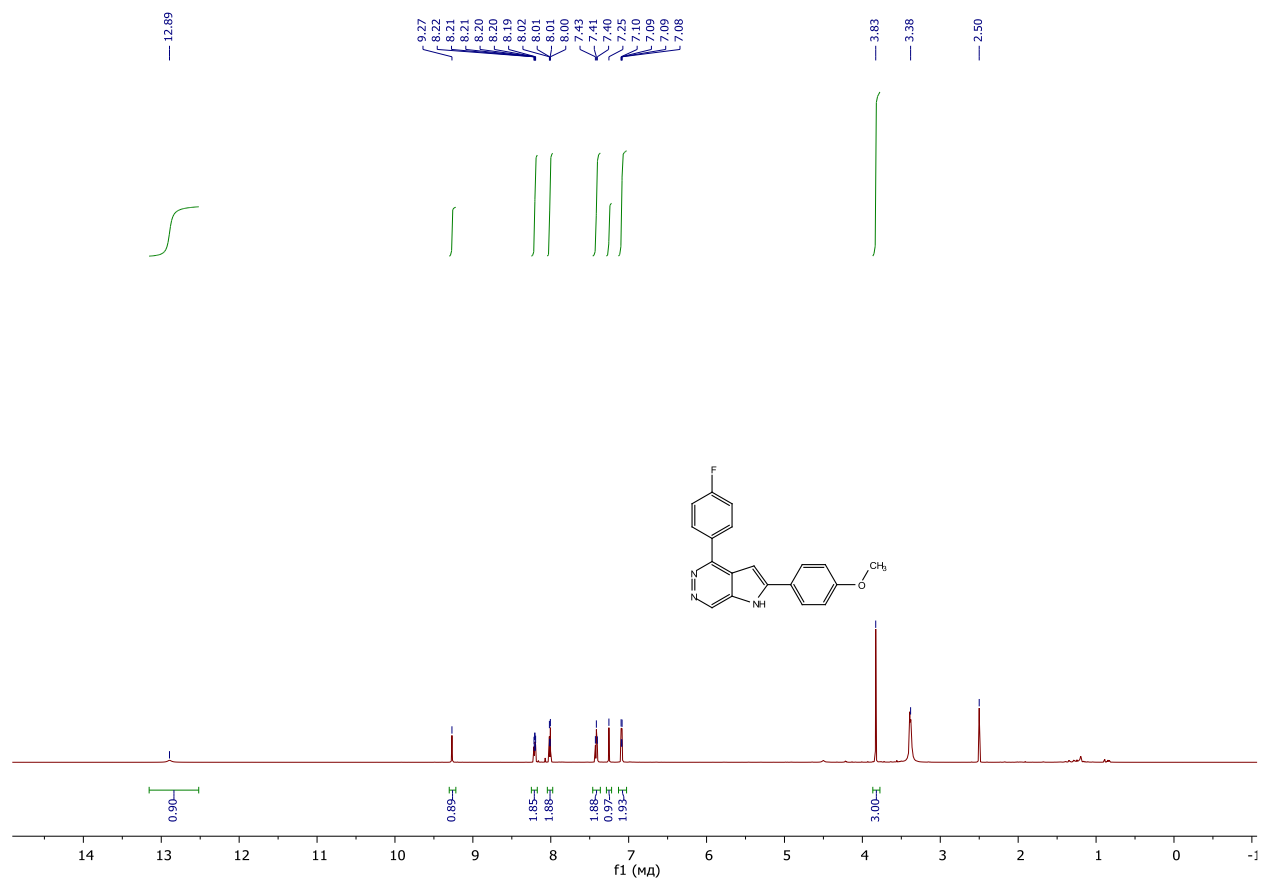

### 3d <sup>13</sup>C NMR

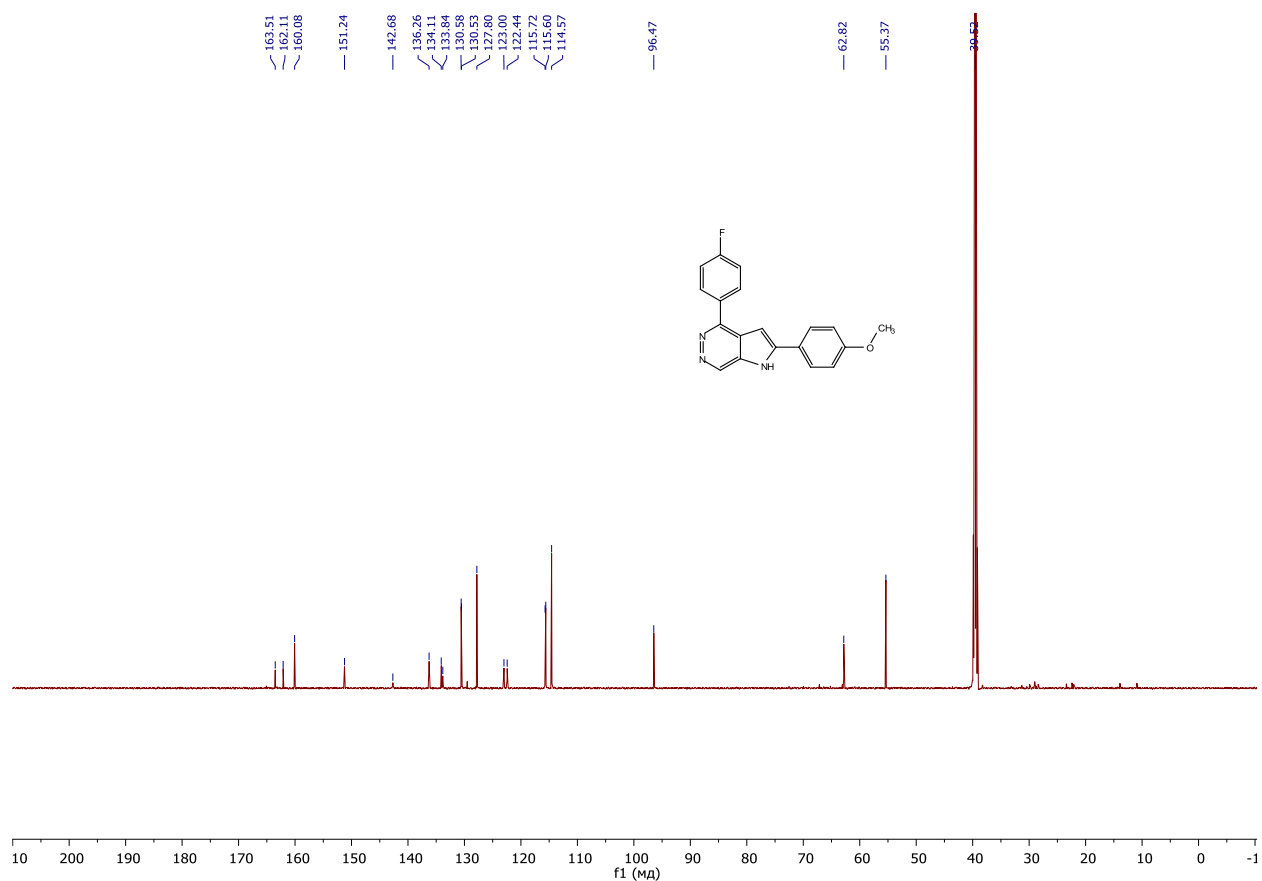



### 4a <sup>1</sup>H NMR

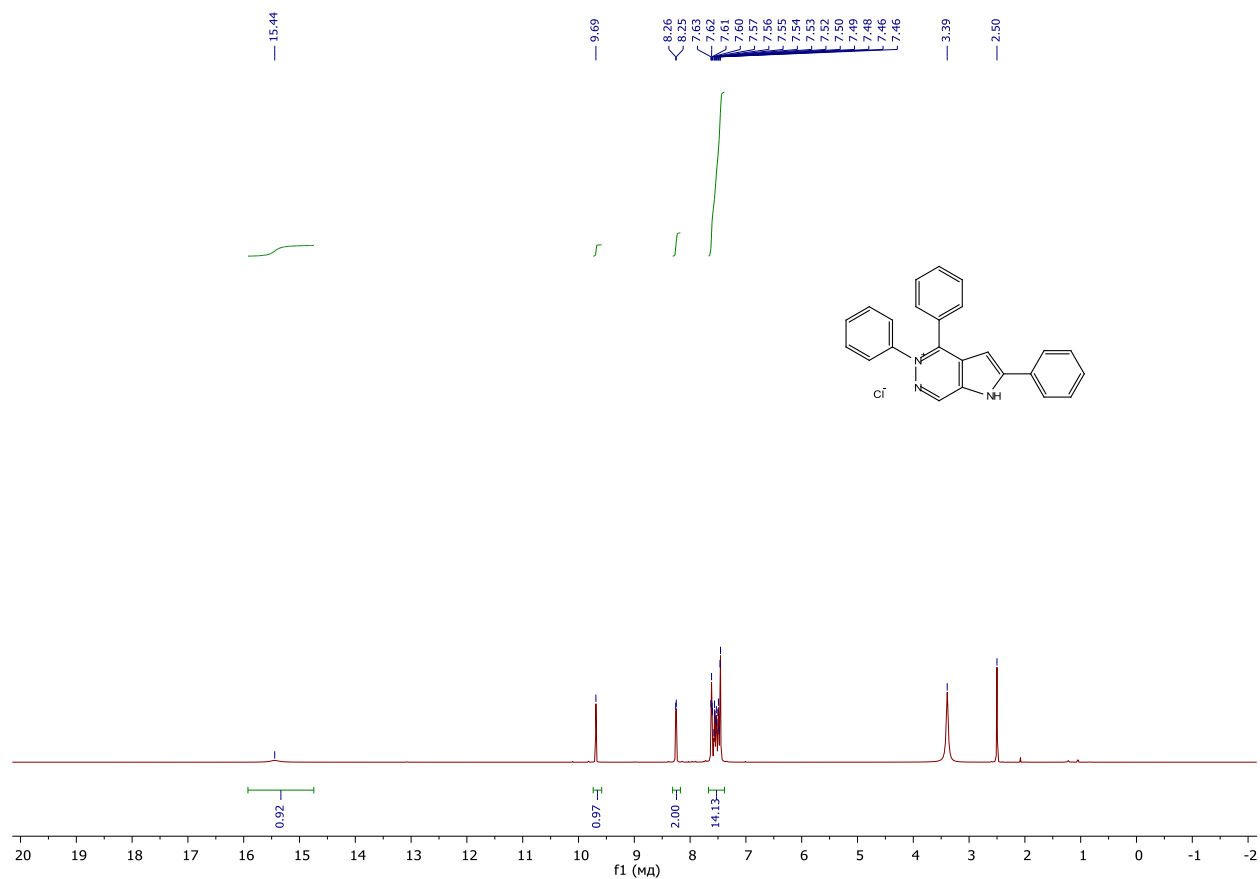

### 4a <sup>13</sup>C NMR

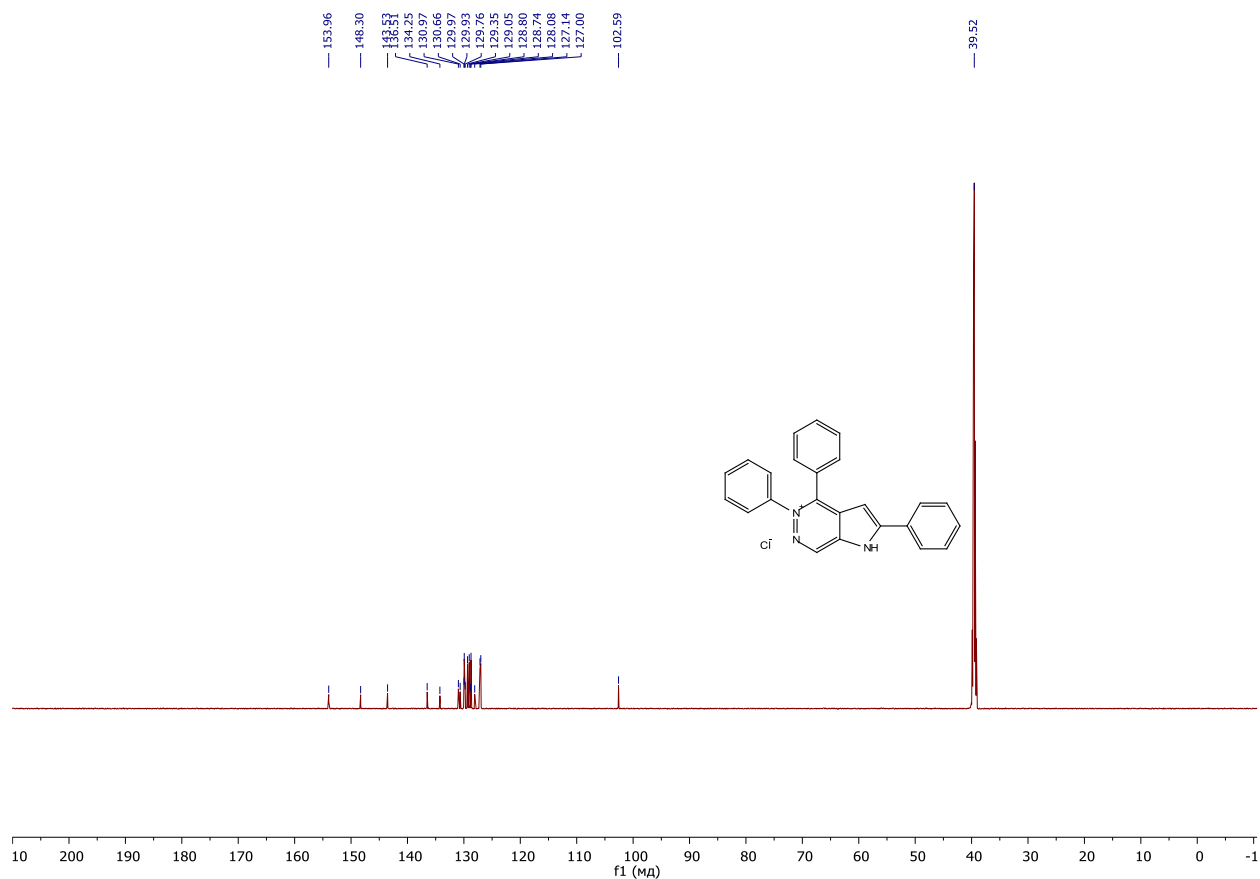



### 4c <sup>1</sup>H NMR

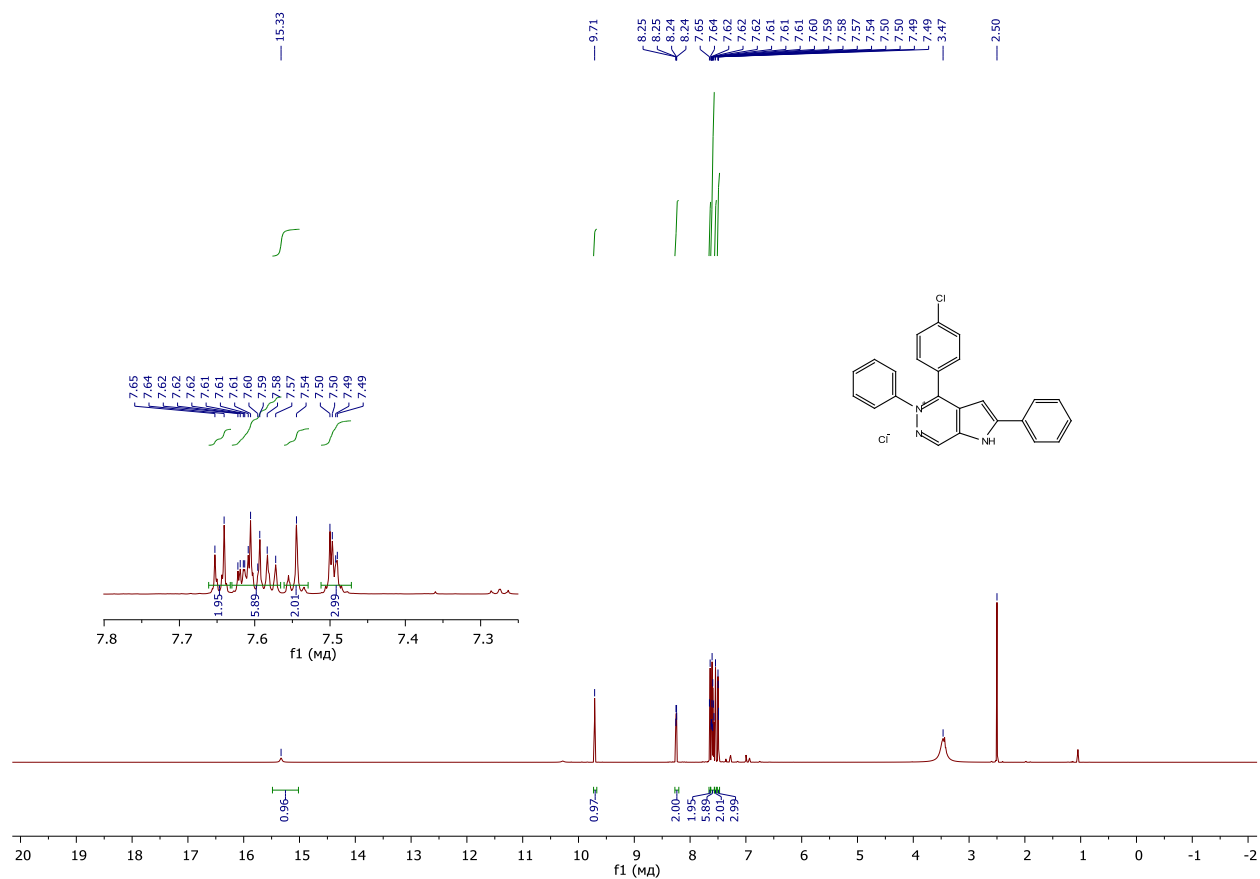

### 4c <sup>13</sup>C NMR

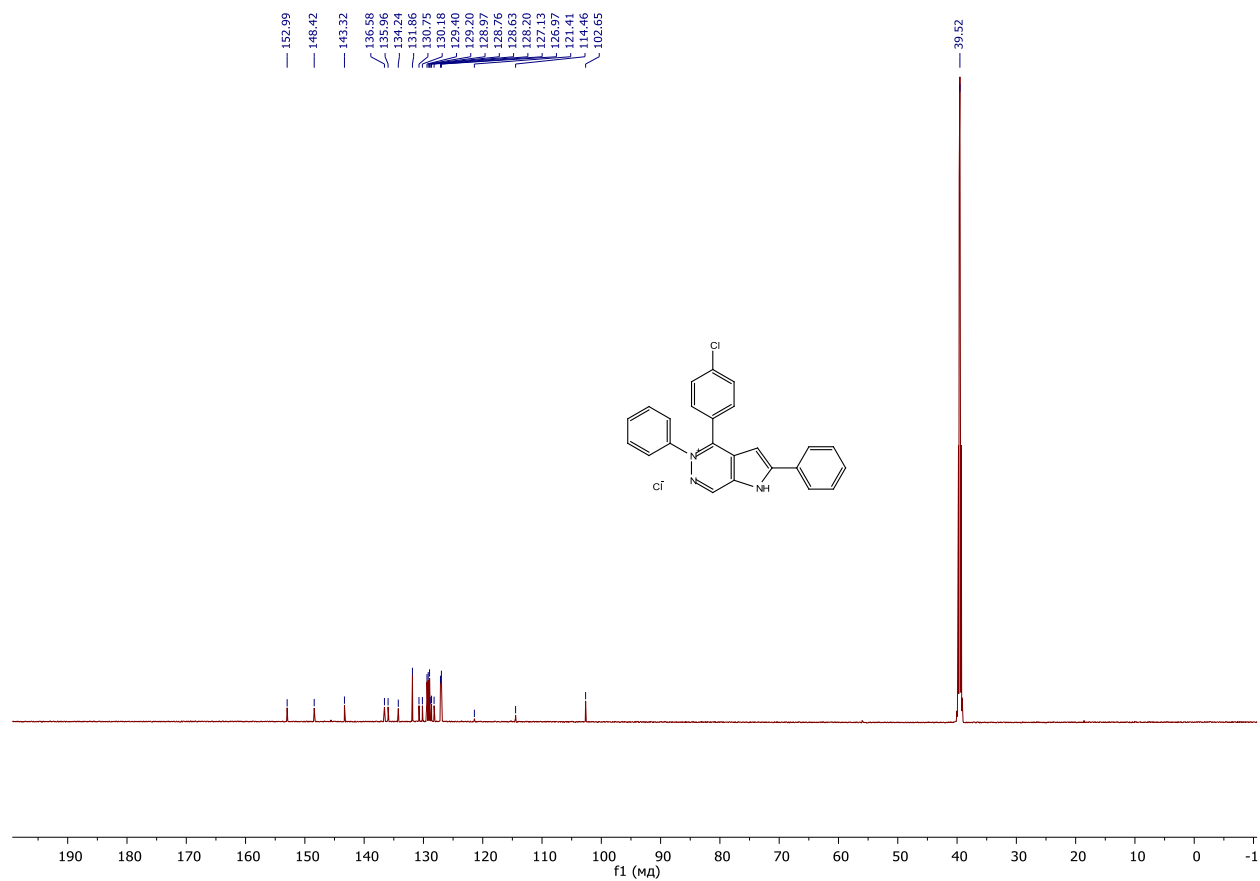

### 4d <sup>1</sup>H NMR

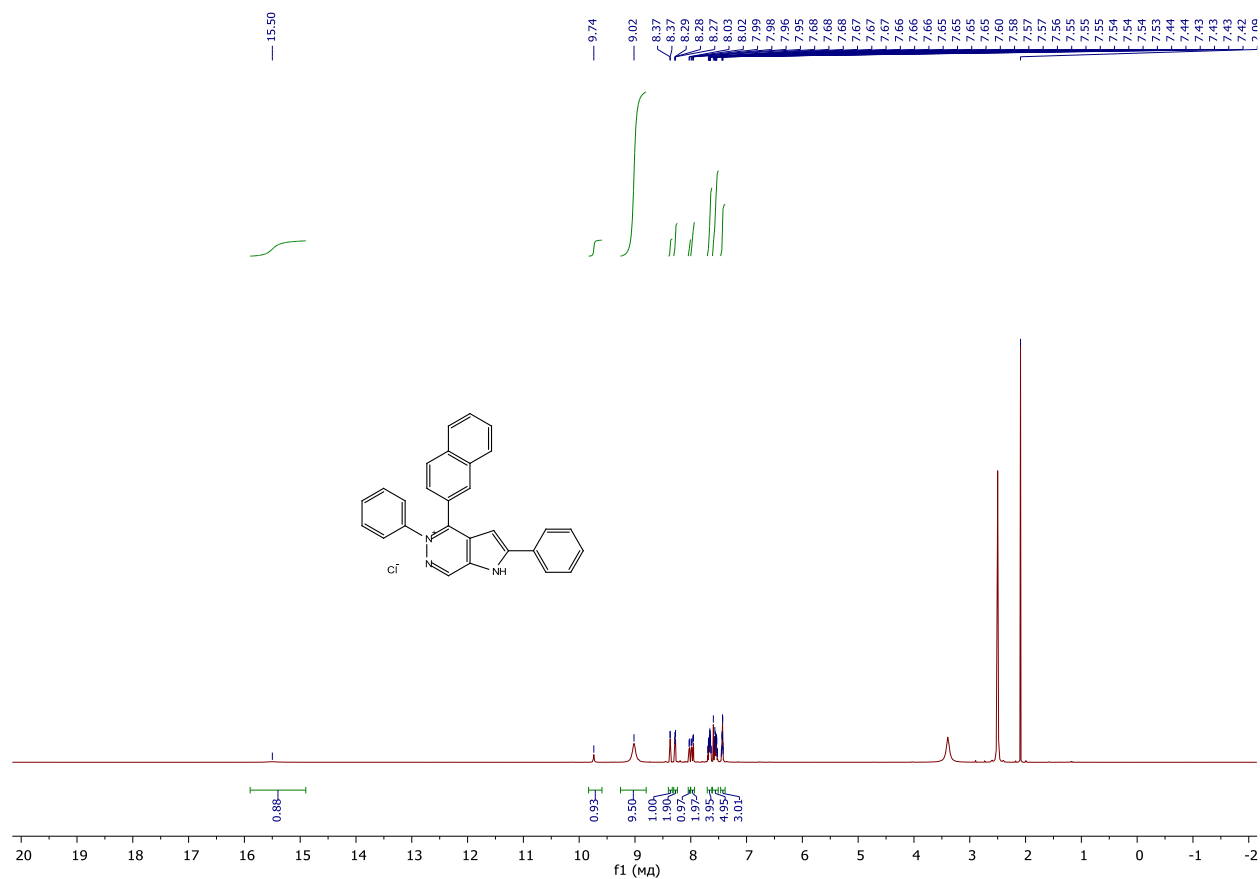

### 4d <sup>13</sup>C NMR

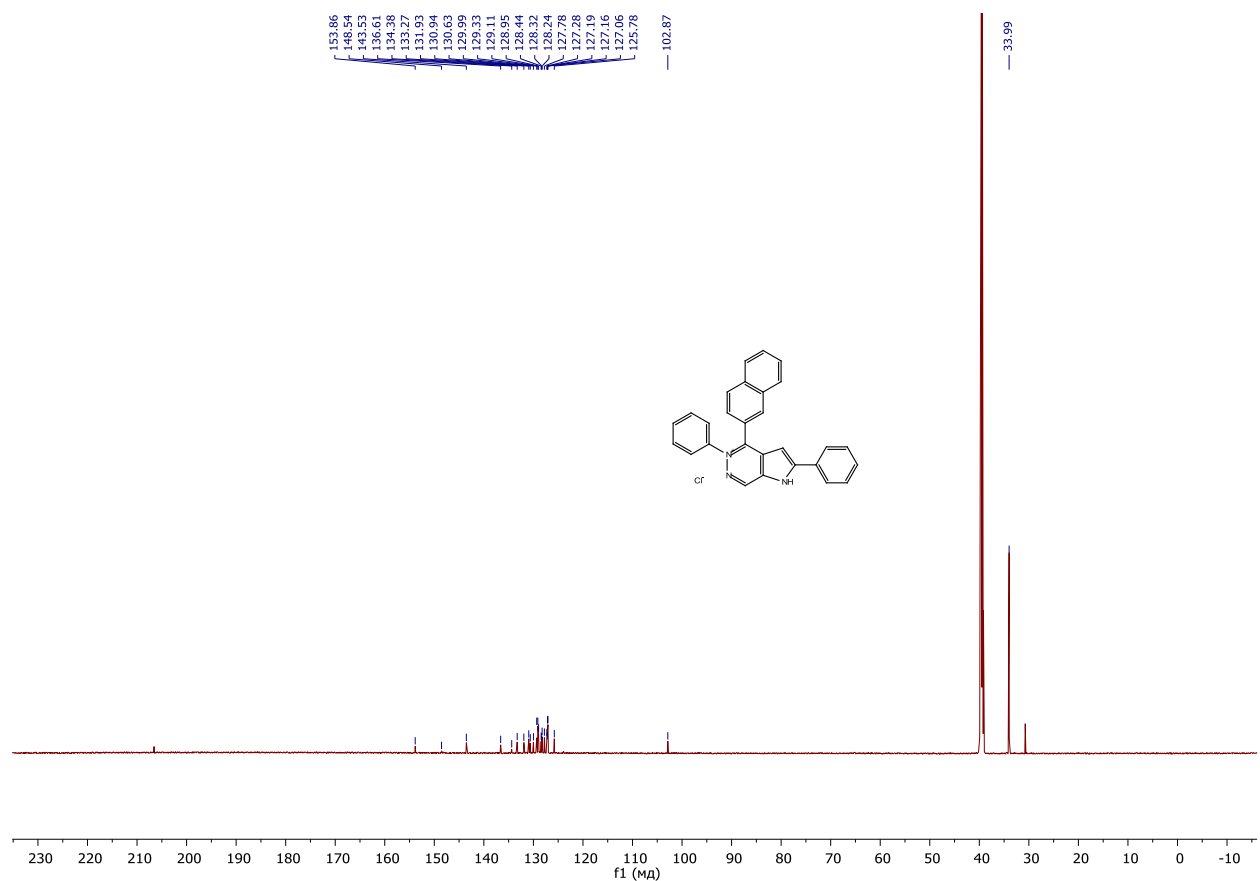

**4e**  $^1\text{H}$  NMR

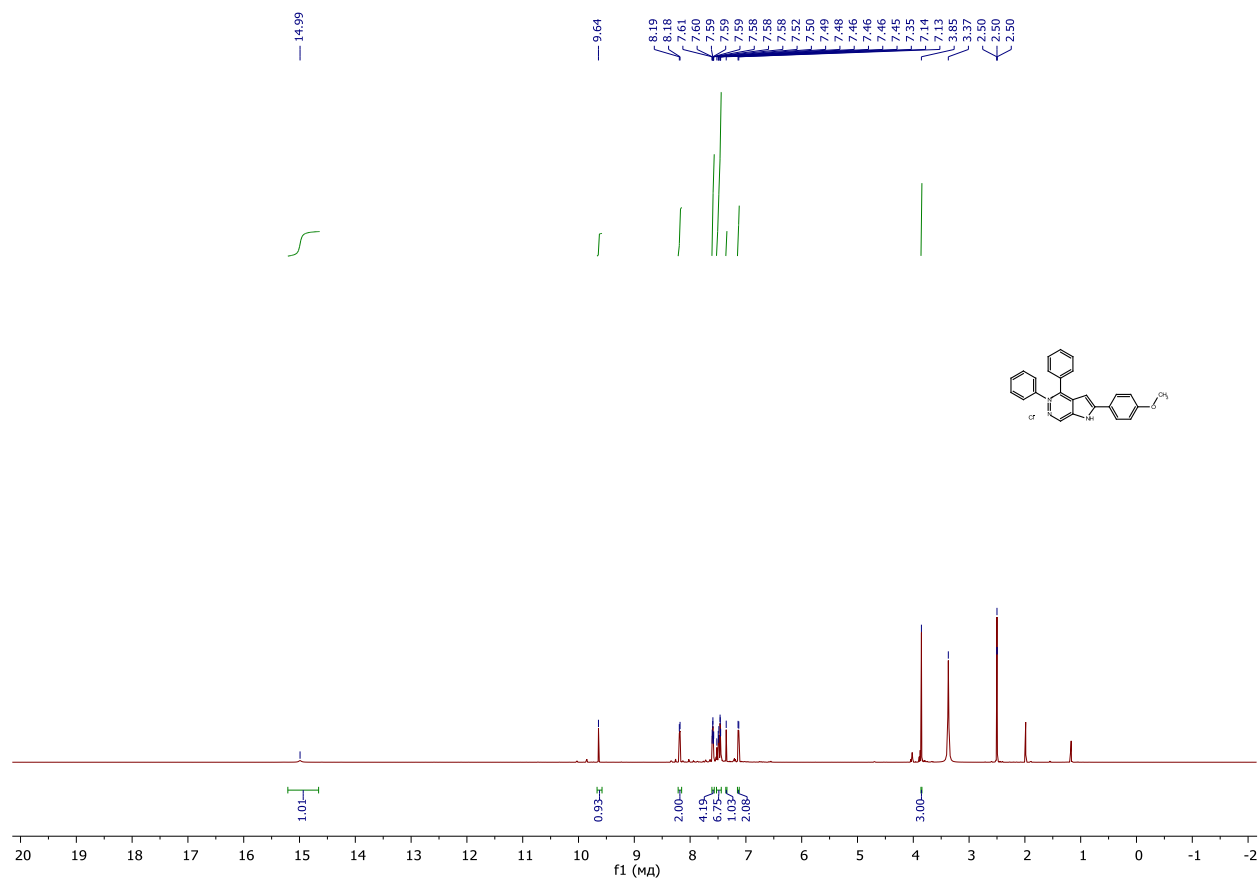

**4e**  $^{13}\text{C}$  NMR

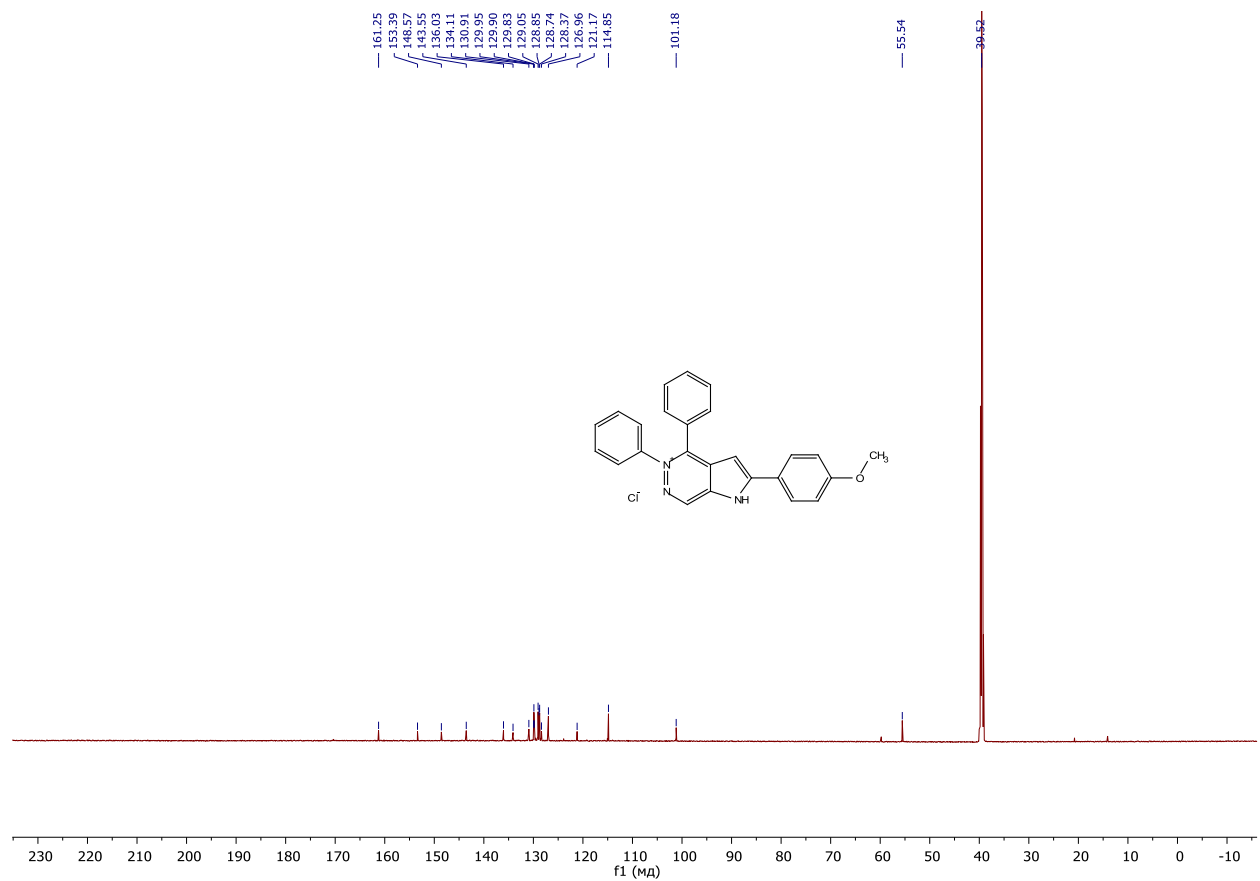

**4f**  $^1\text{H}$  NMR

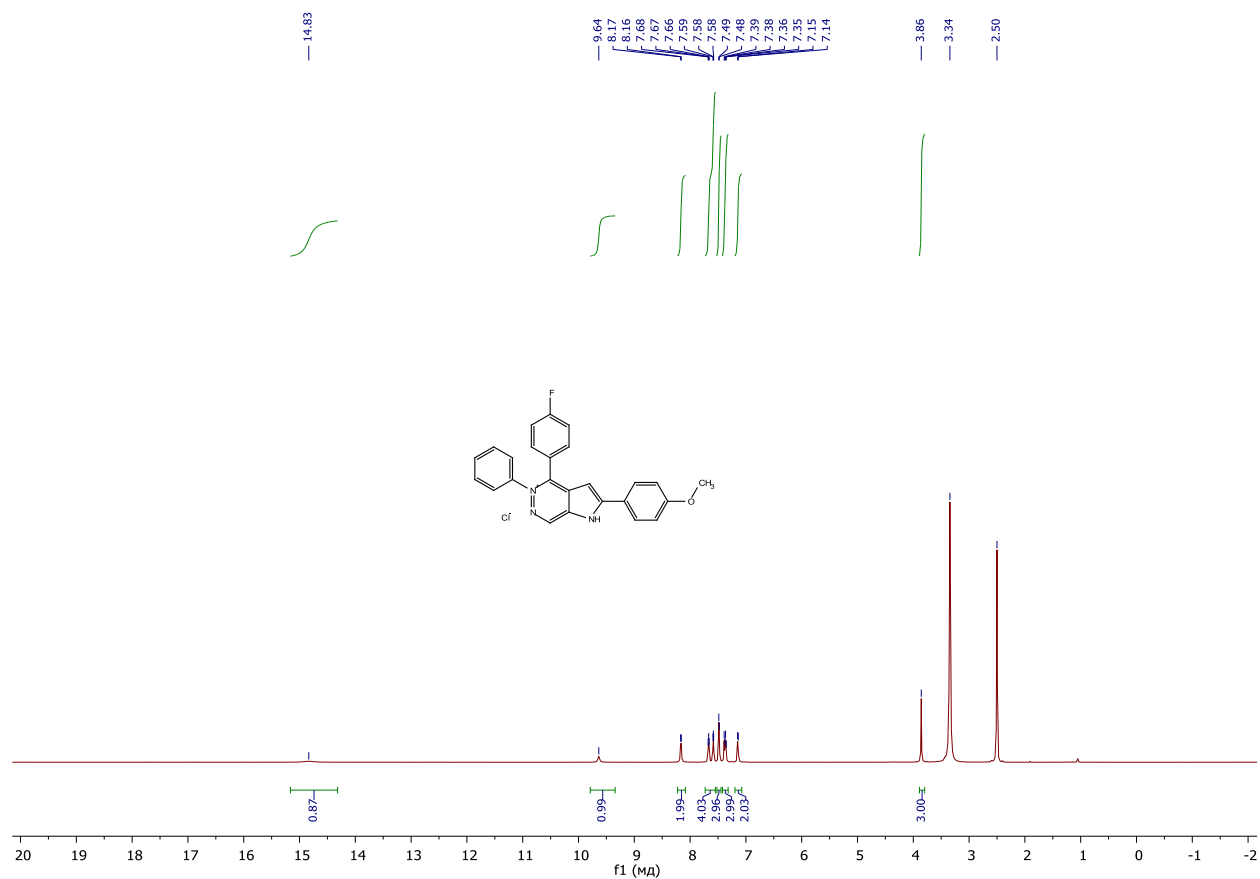

**4f**  $^{13}\text{C}$  NMR

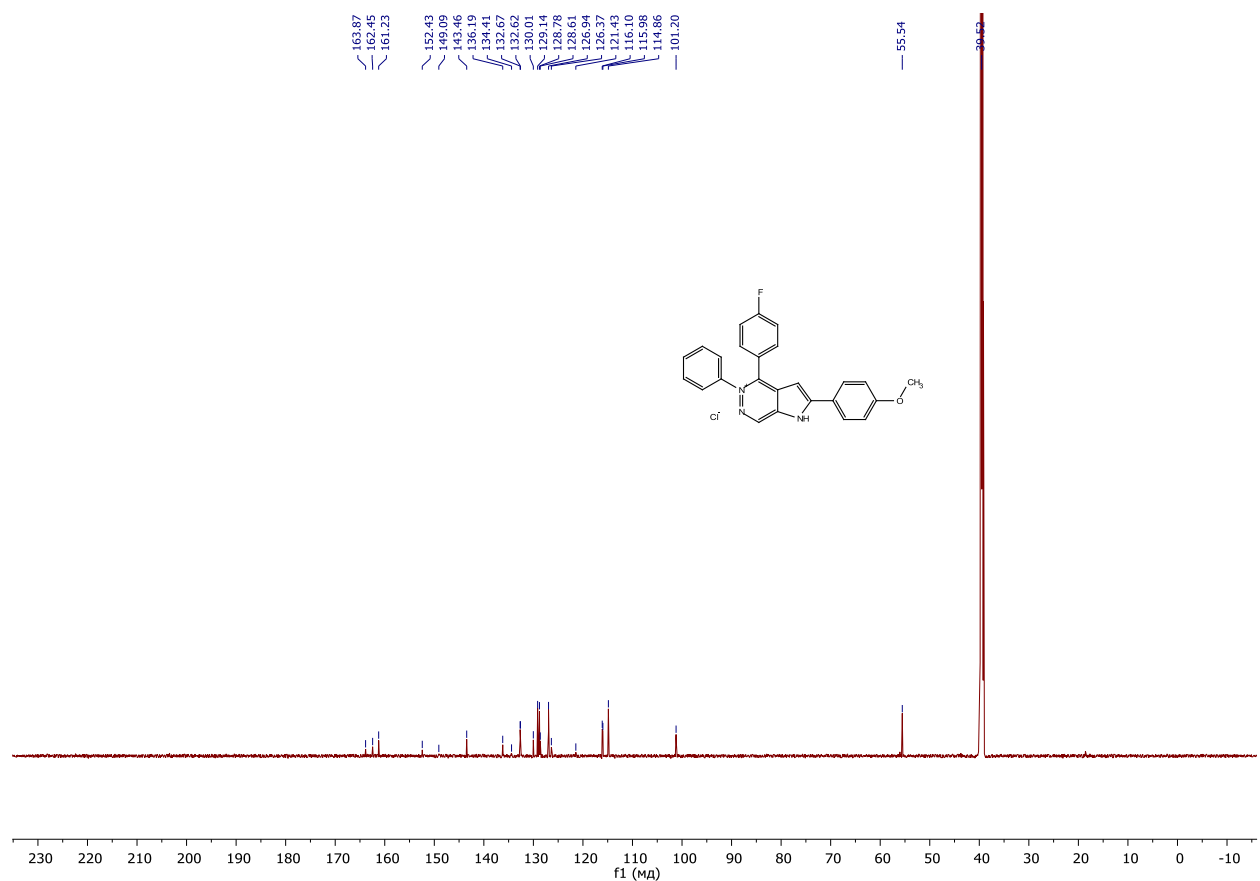

# 4g <sup>1</sup>H NMR

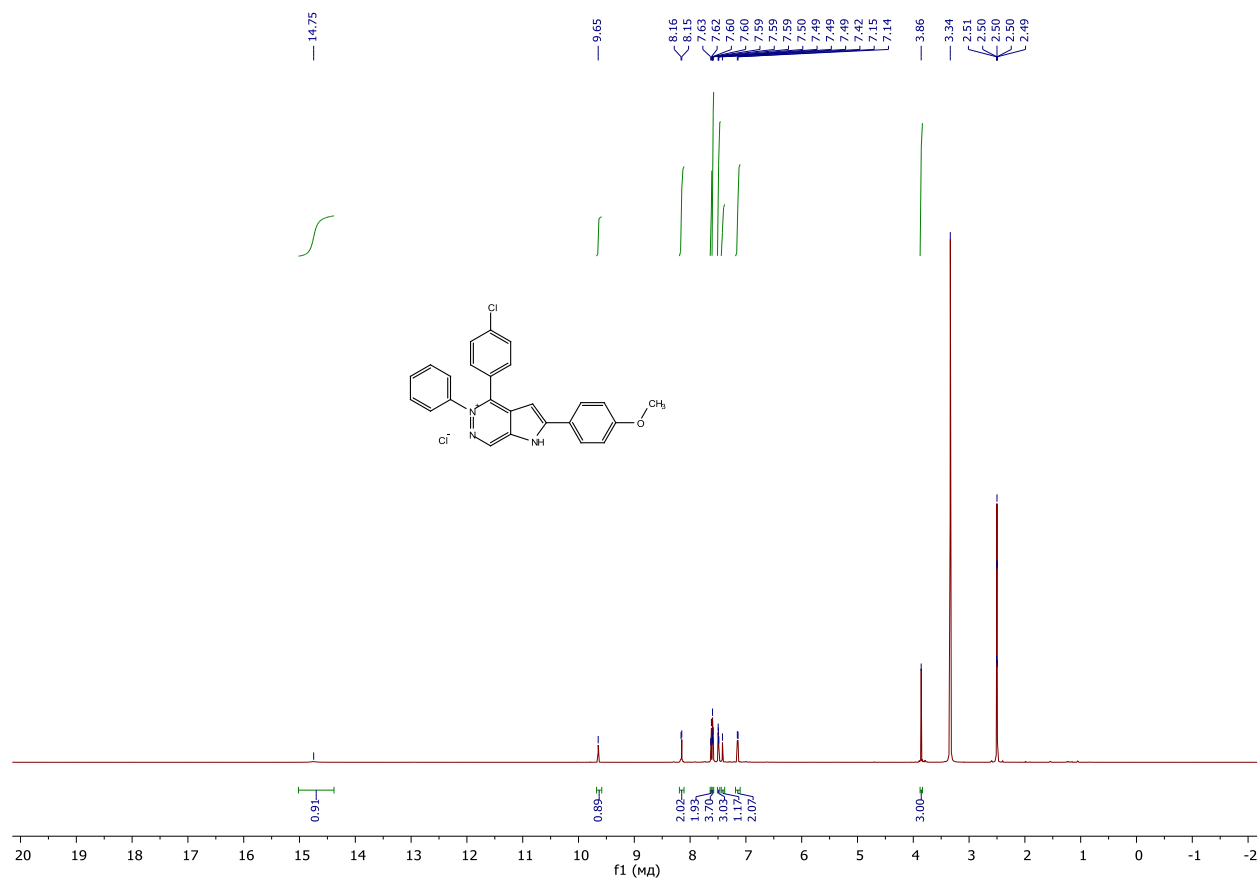

# 4g <sup>13</sup>C NMR

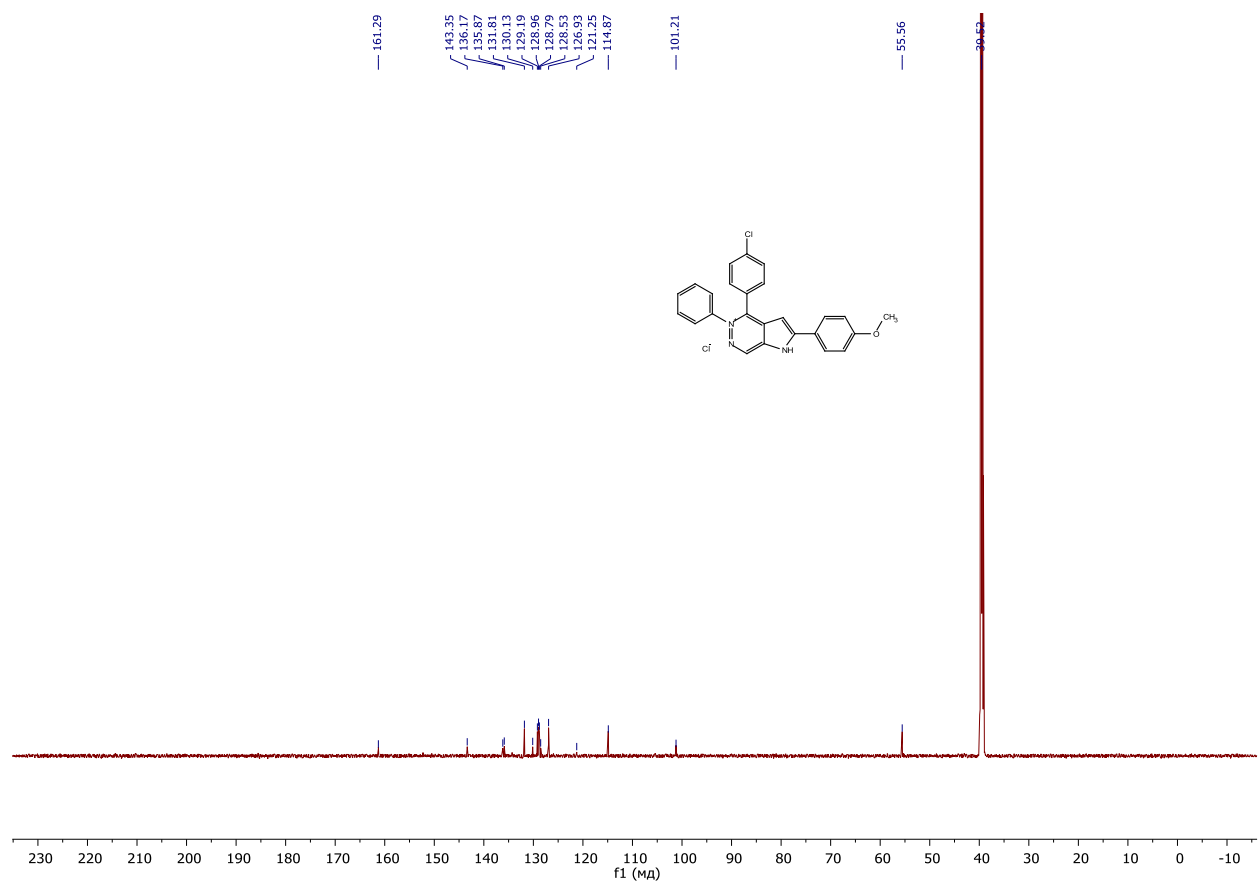

### 4h <sup>1</sup>H NMR

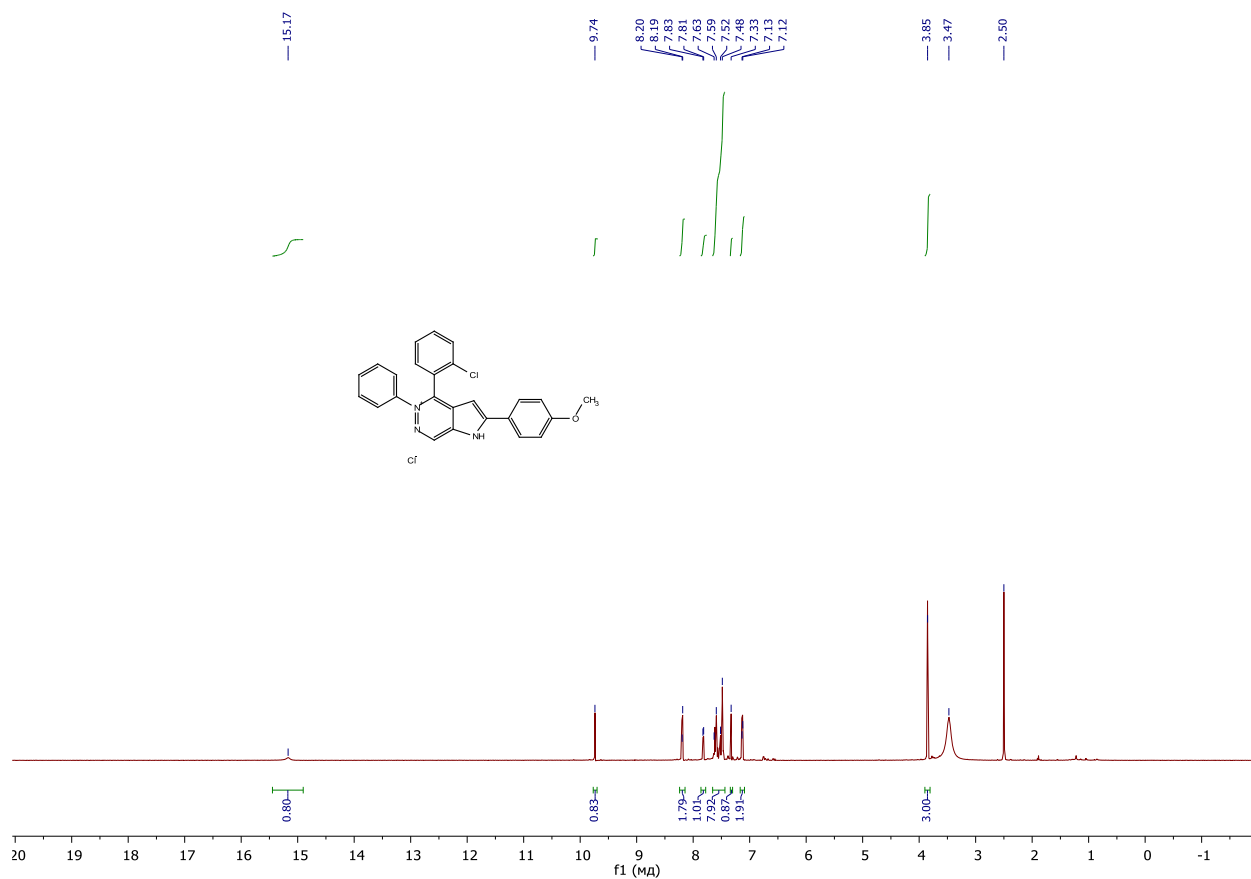

### 4h <sup>13</sup>C NMR

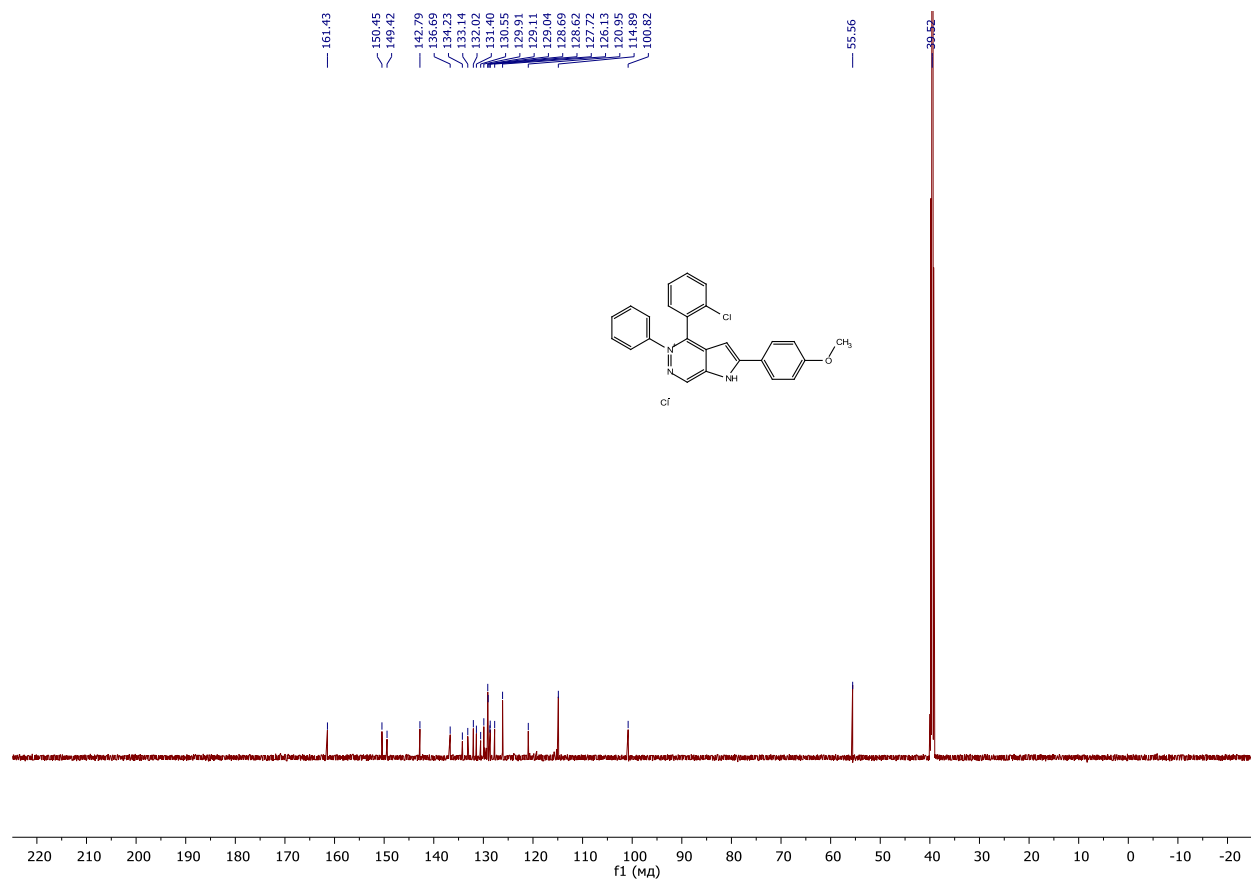



### 4i <sup>1</sup>H NMR

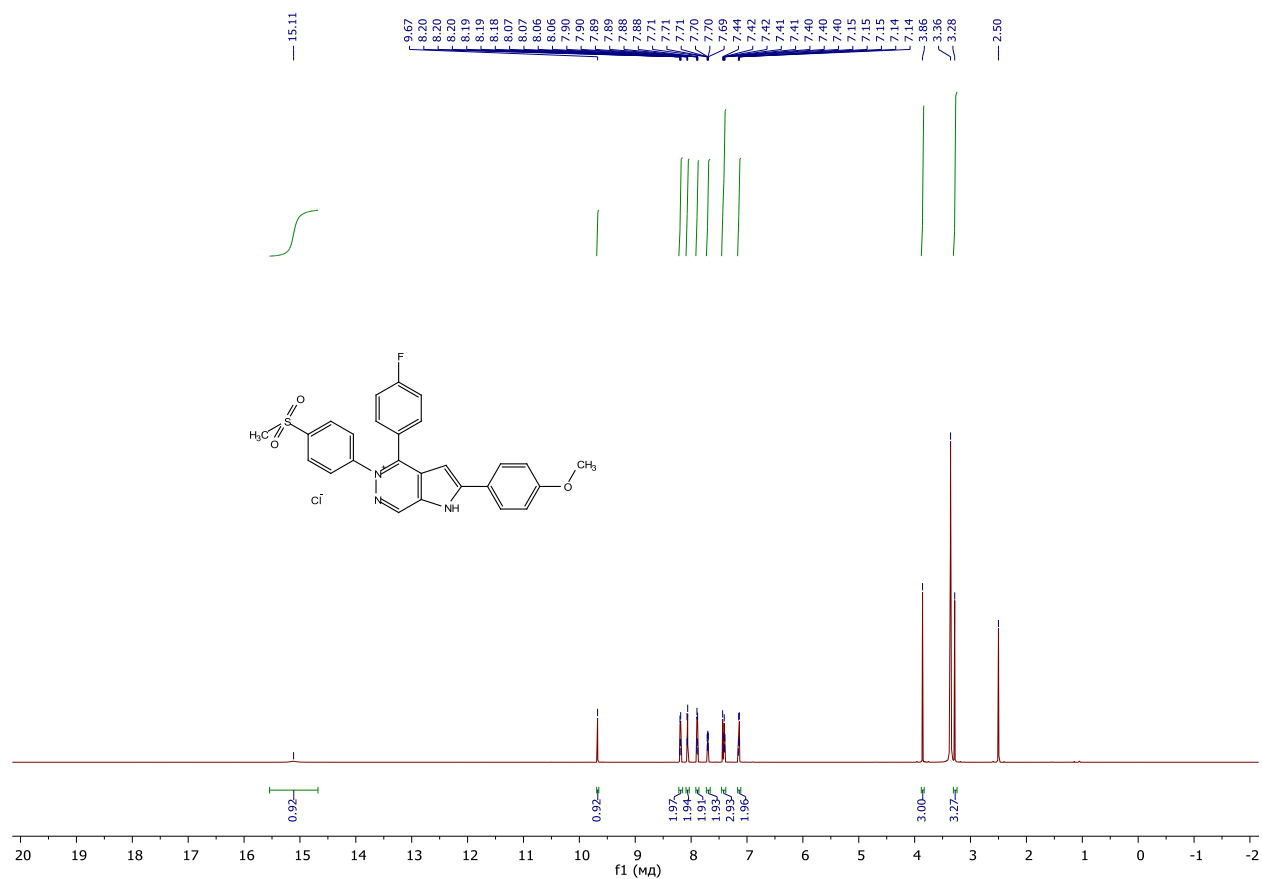

### 4i <sup>13</sup>C NMR

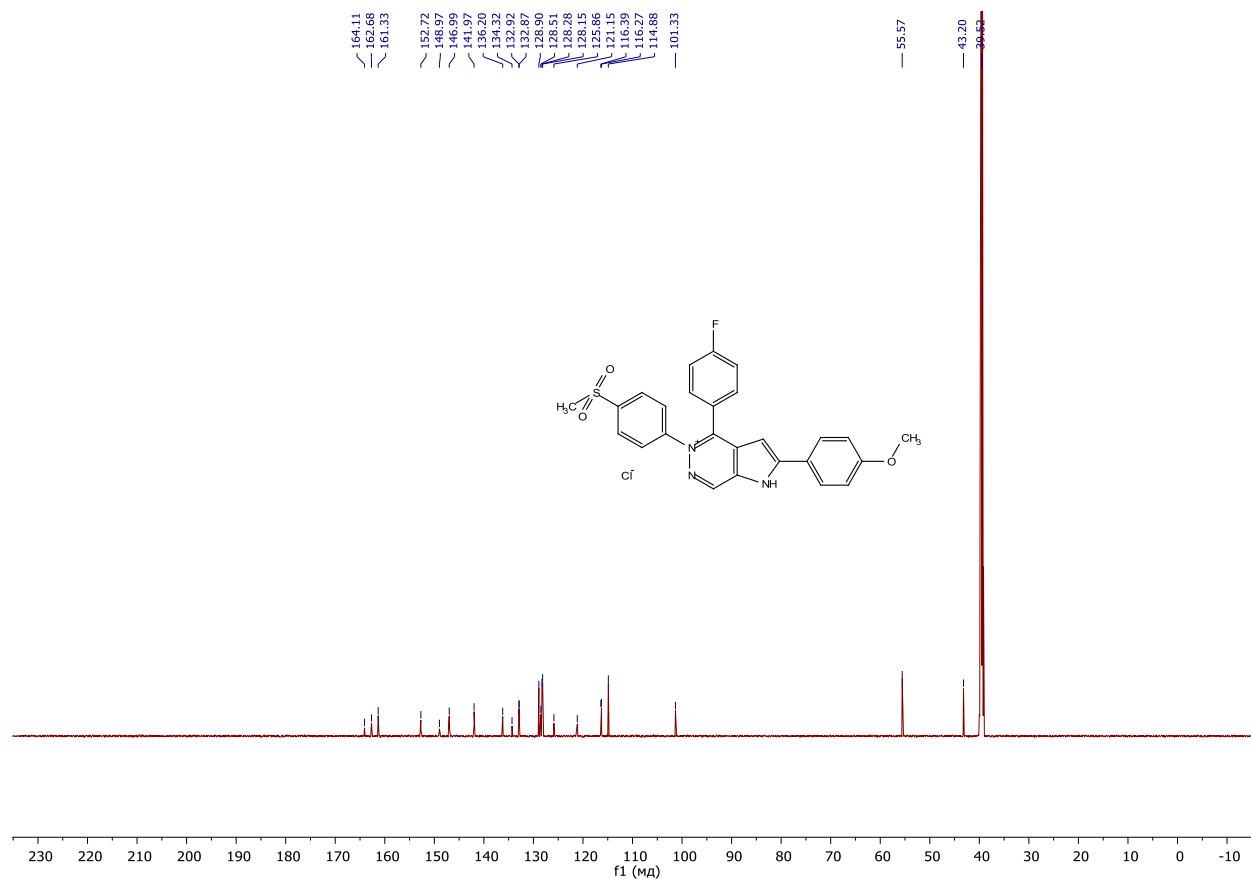

### 4j <sup>1</sup>H NMR

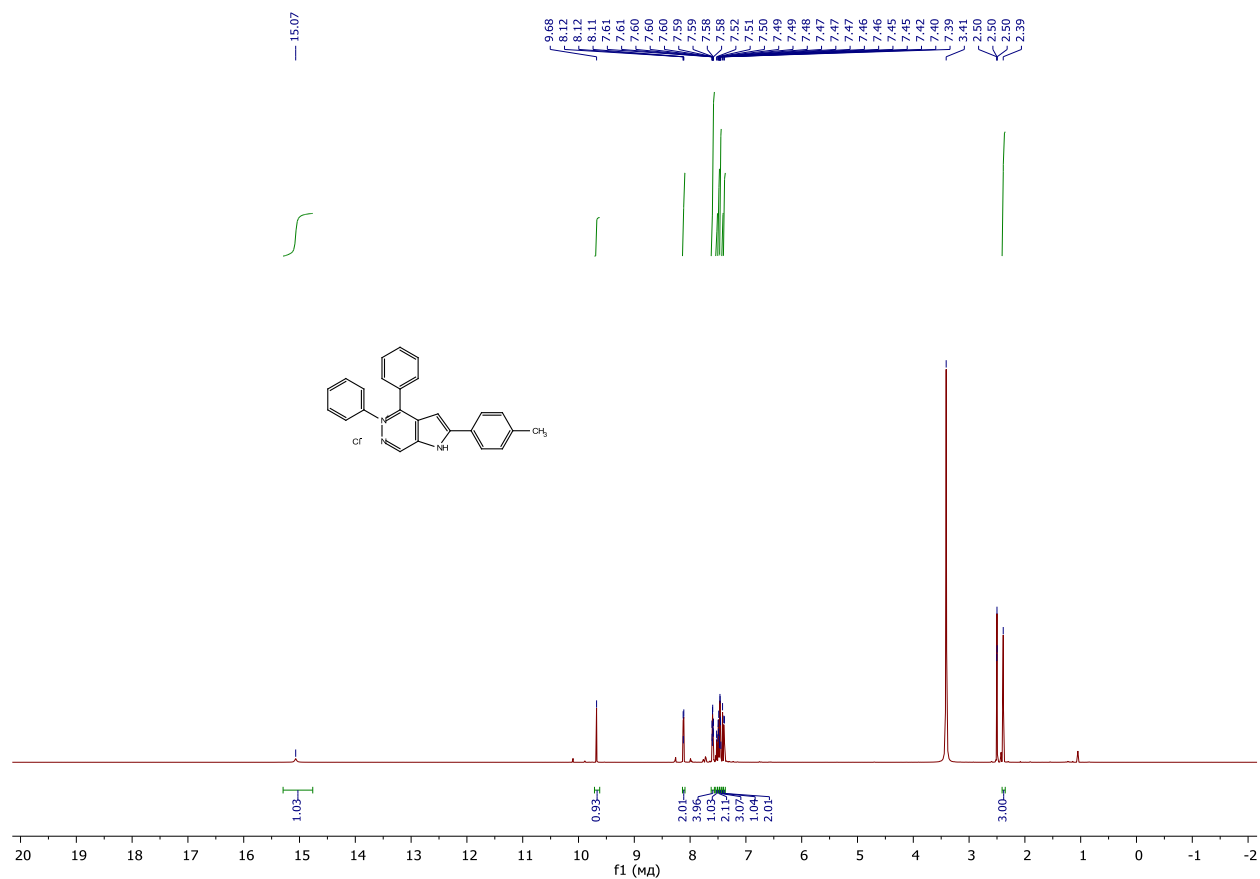

### 4j <sup>13</sup>C NMR

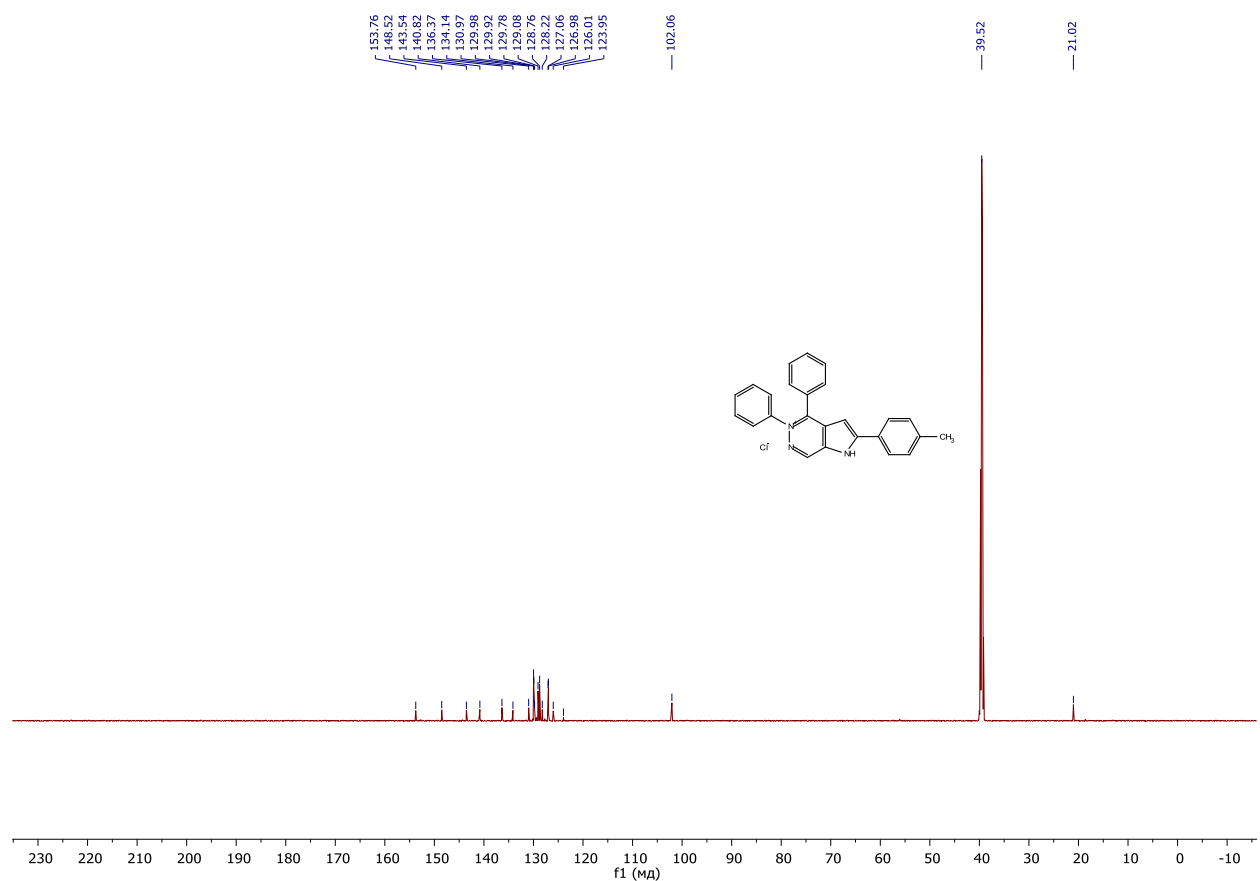

# 4k <sup>1</sup>H NMR

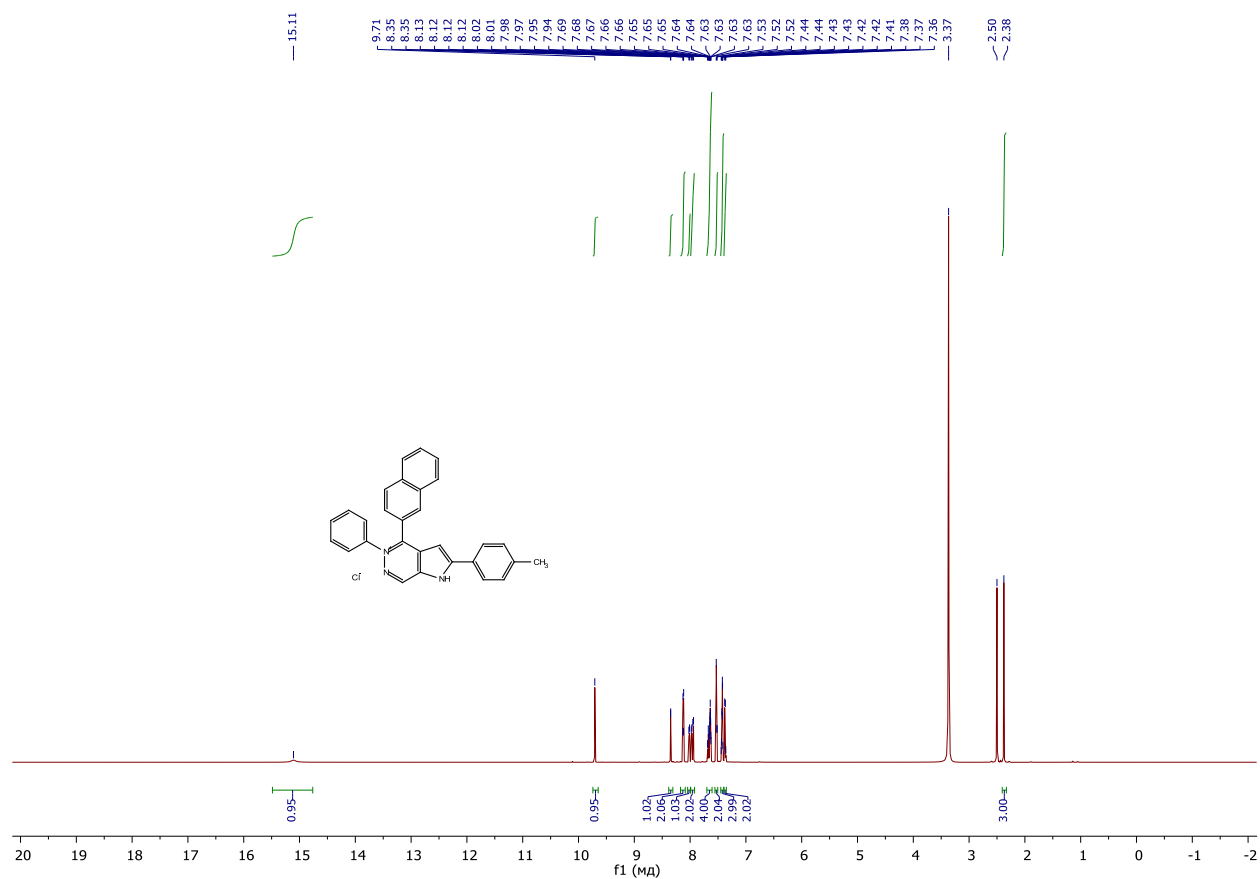

# 4k <sup>13</sup>C NMR

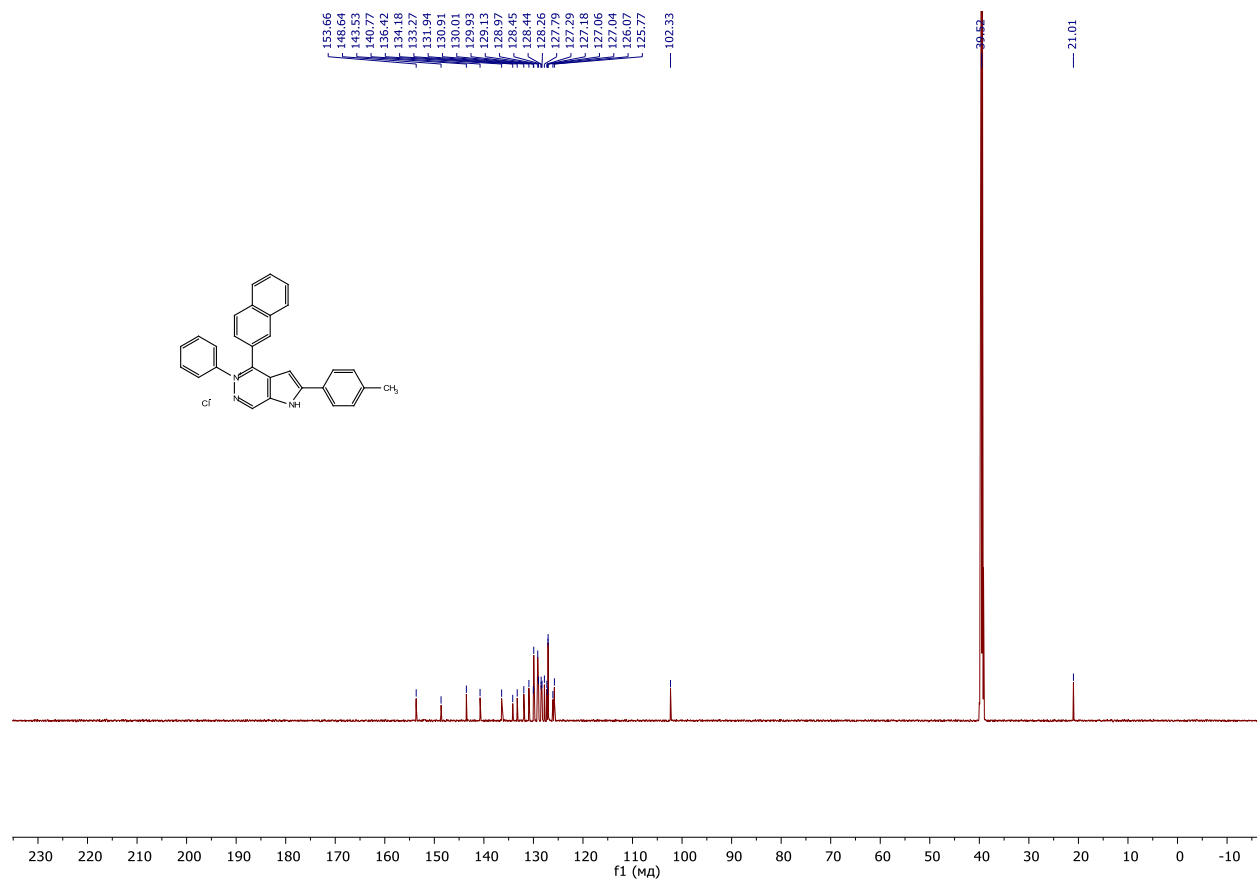

**6a** <sup>1</sup>H NMR

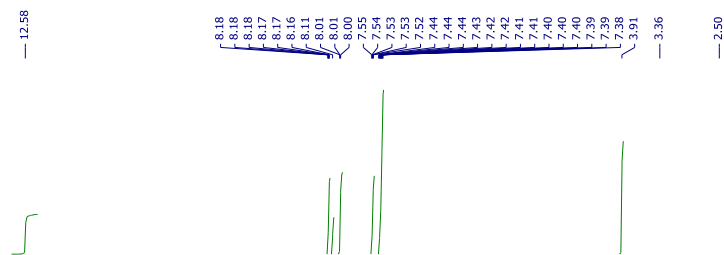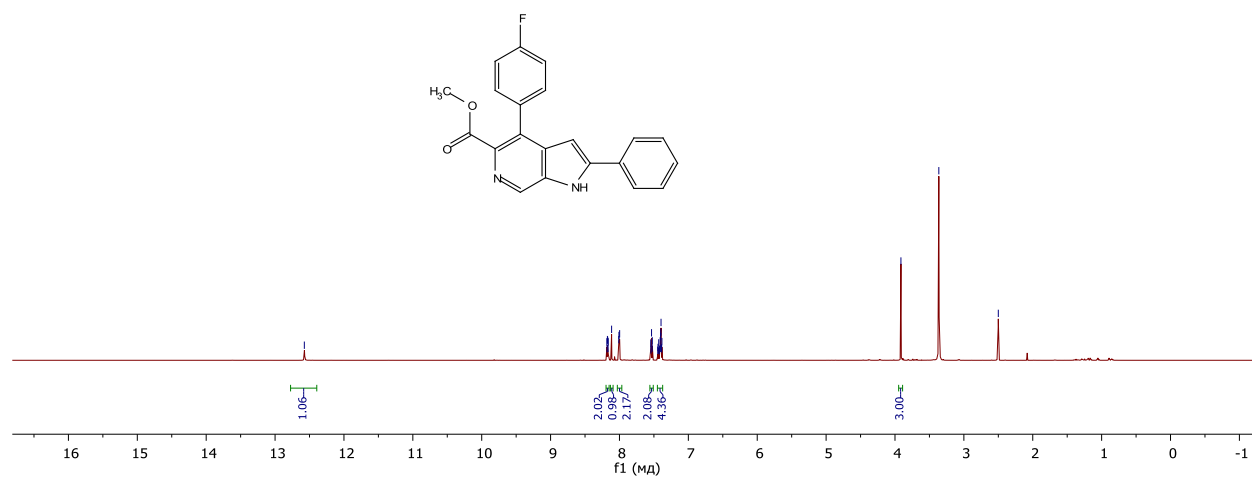

**6a** <sup>13</sup>C NMR

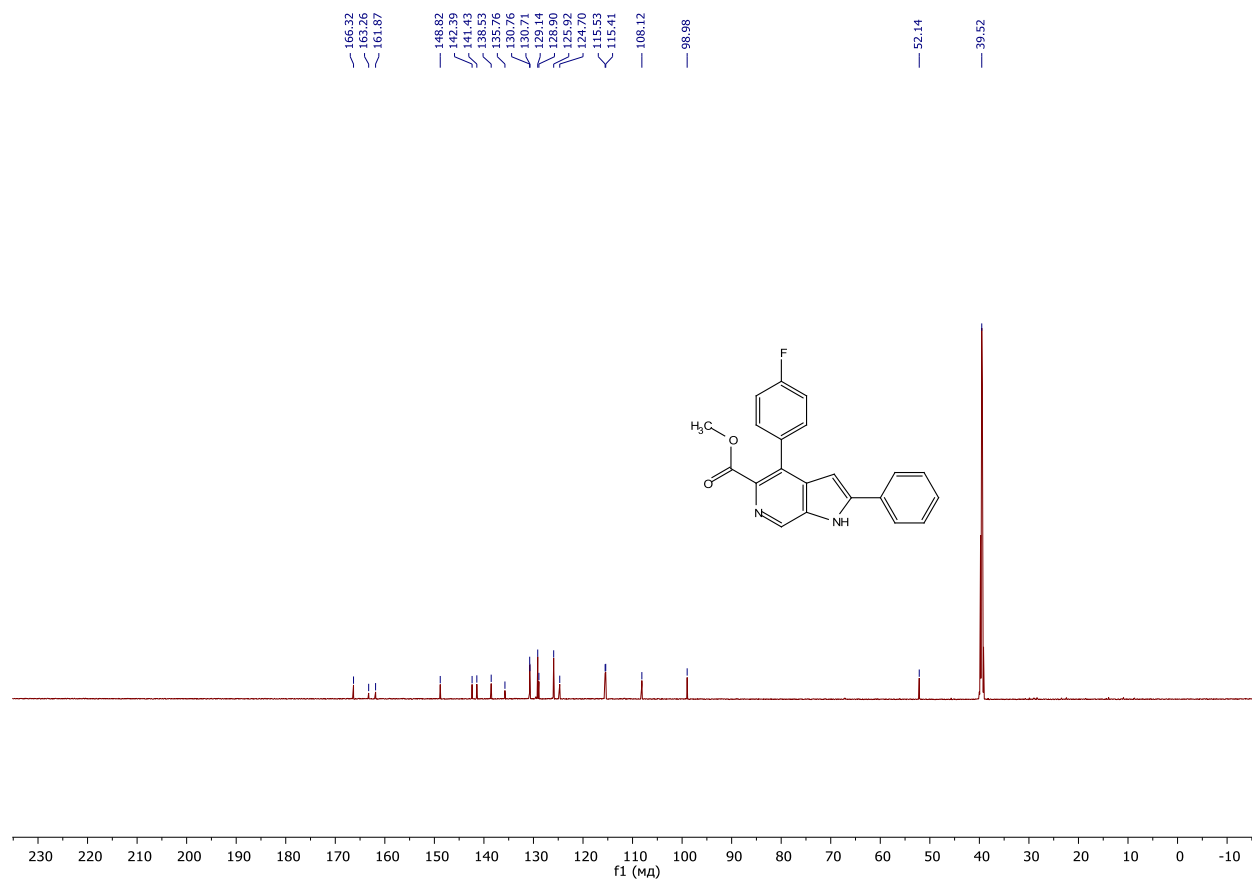

### 6b <sup>1</sup>H NMR

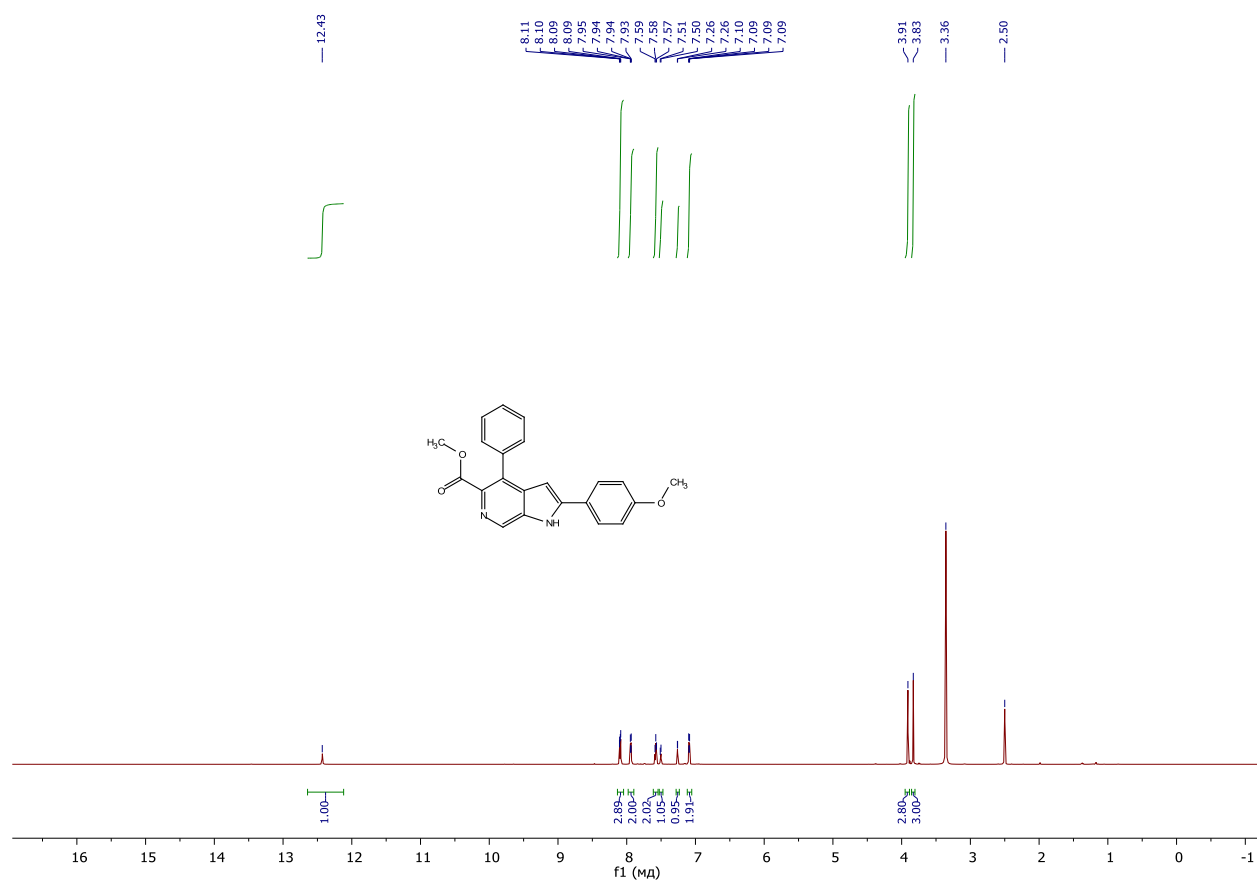

### 6b <sup>13</sup>C NMR

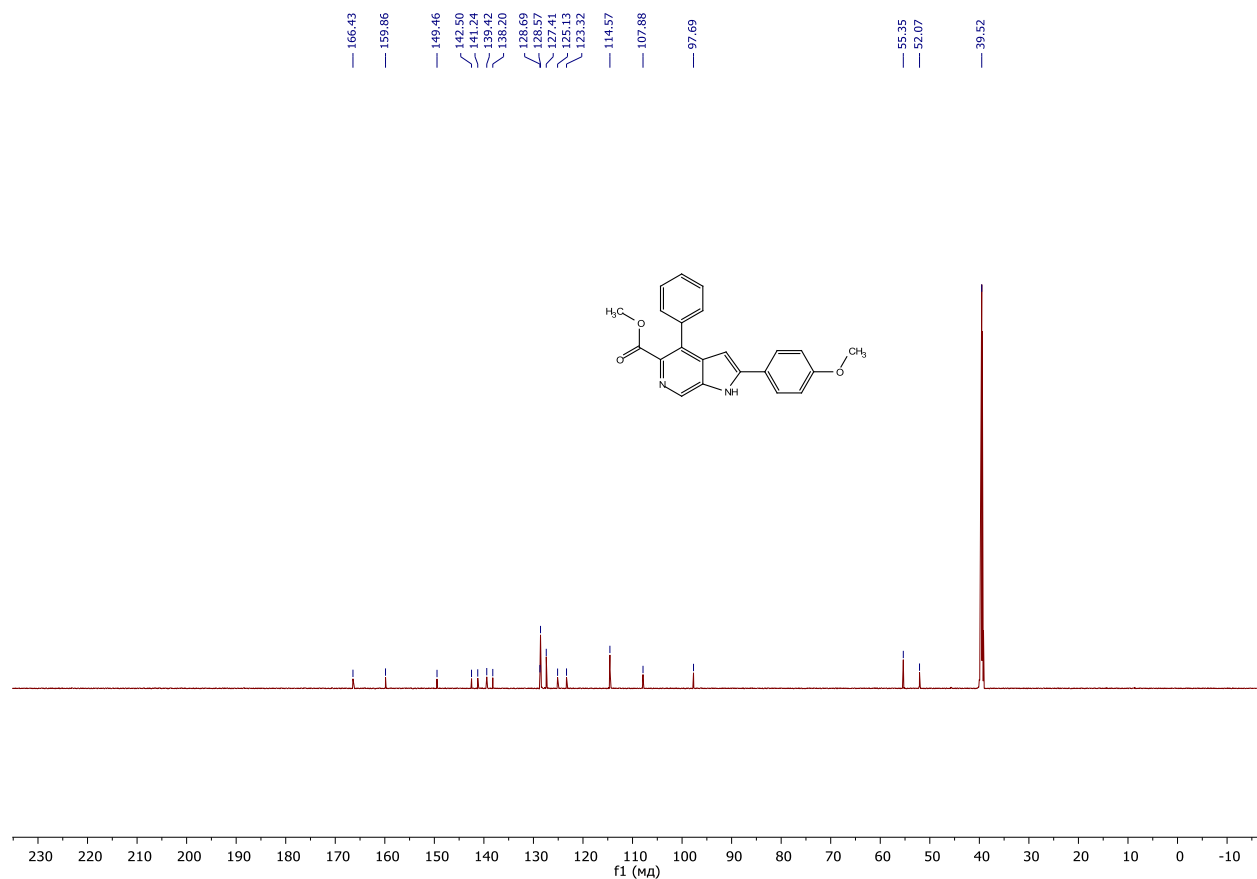

6b HSQC

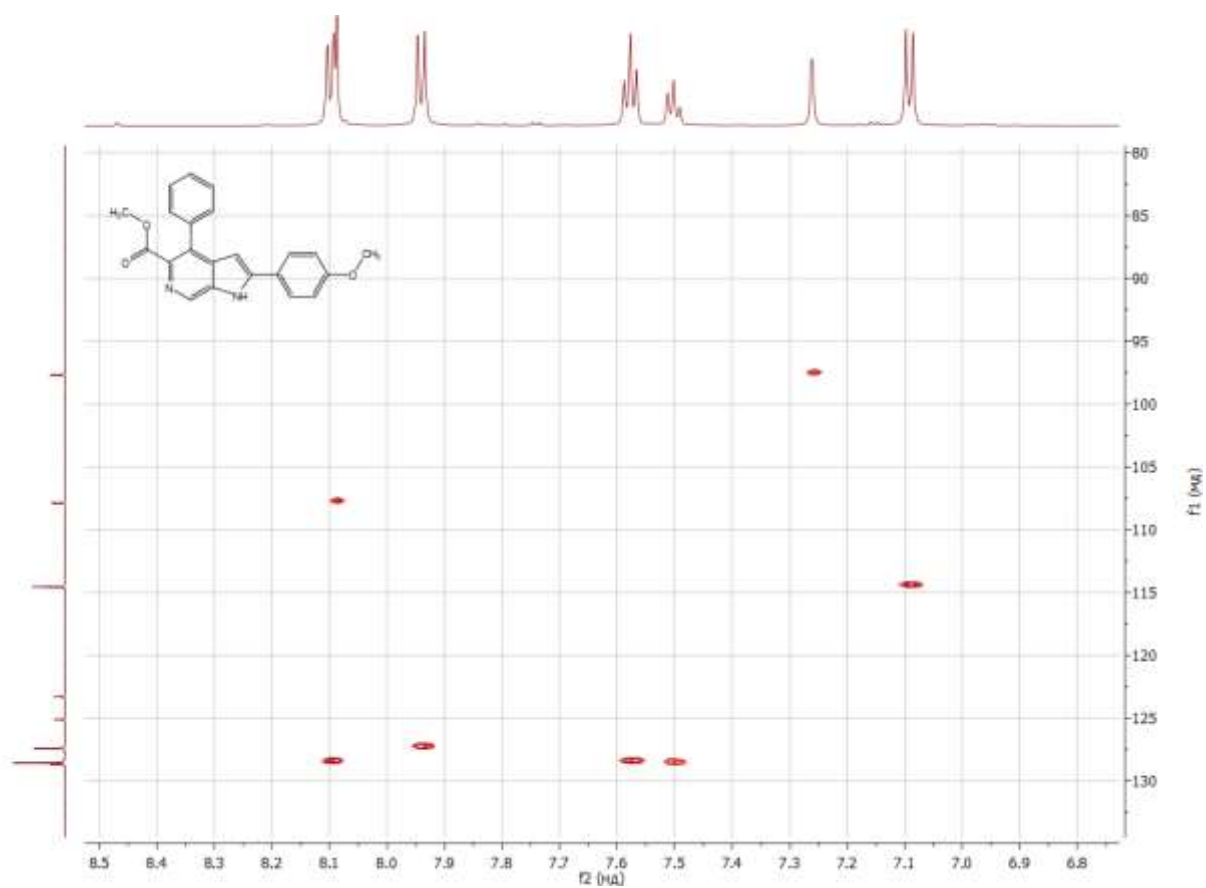

6b HMBC

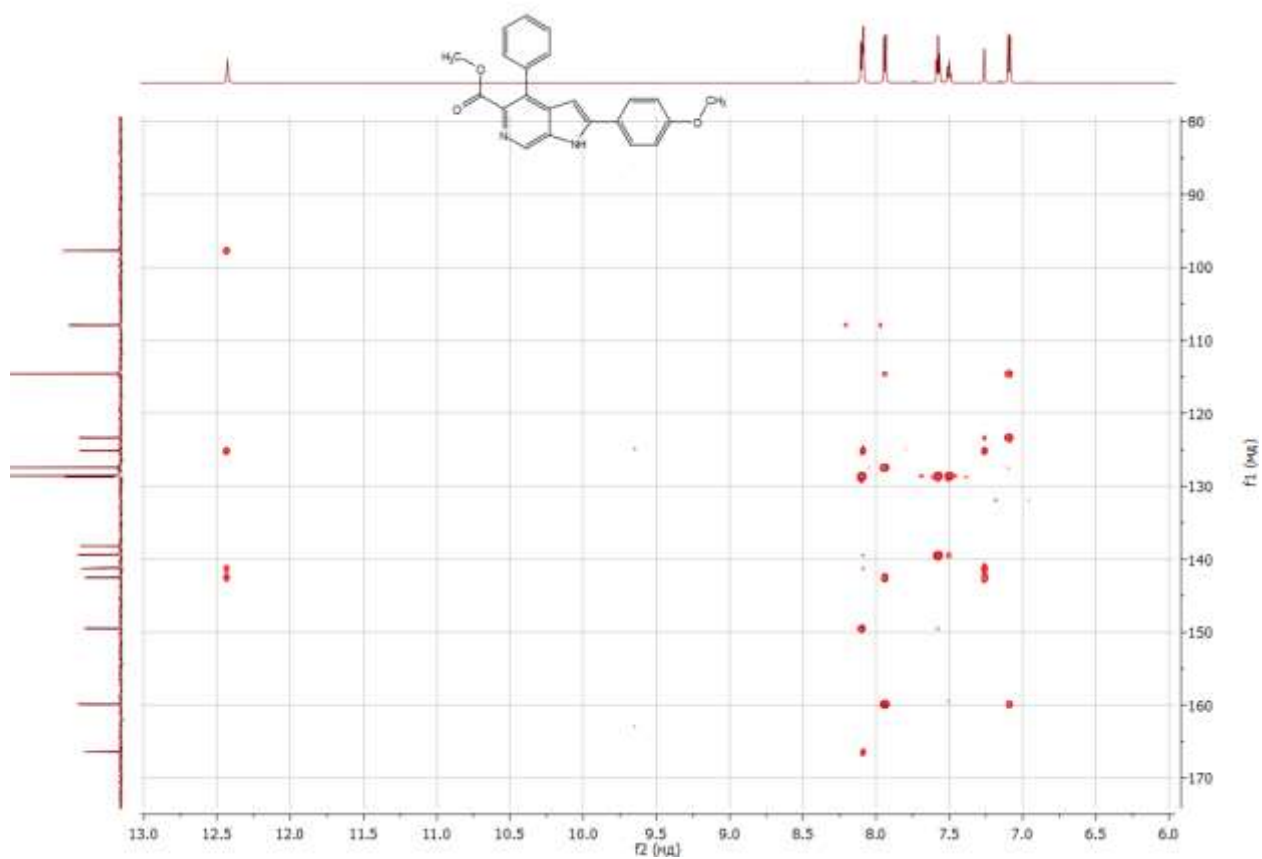

### 6c <sup>1</sup>H NMR

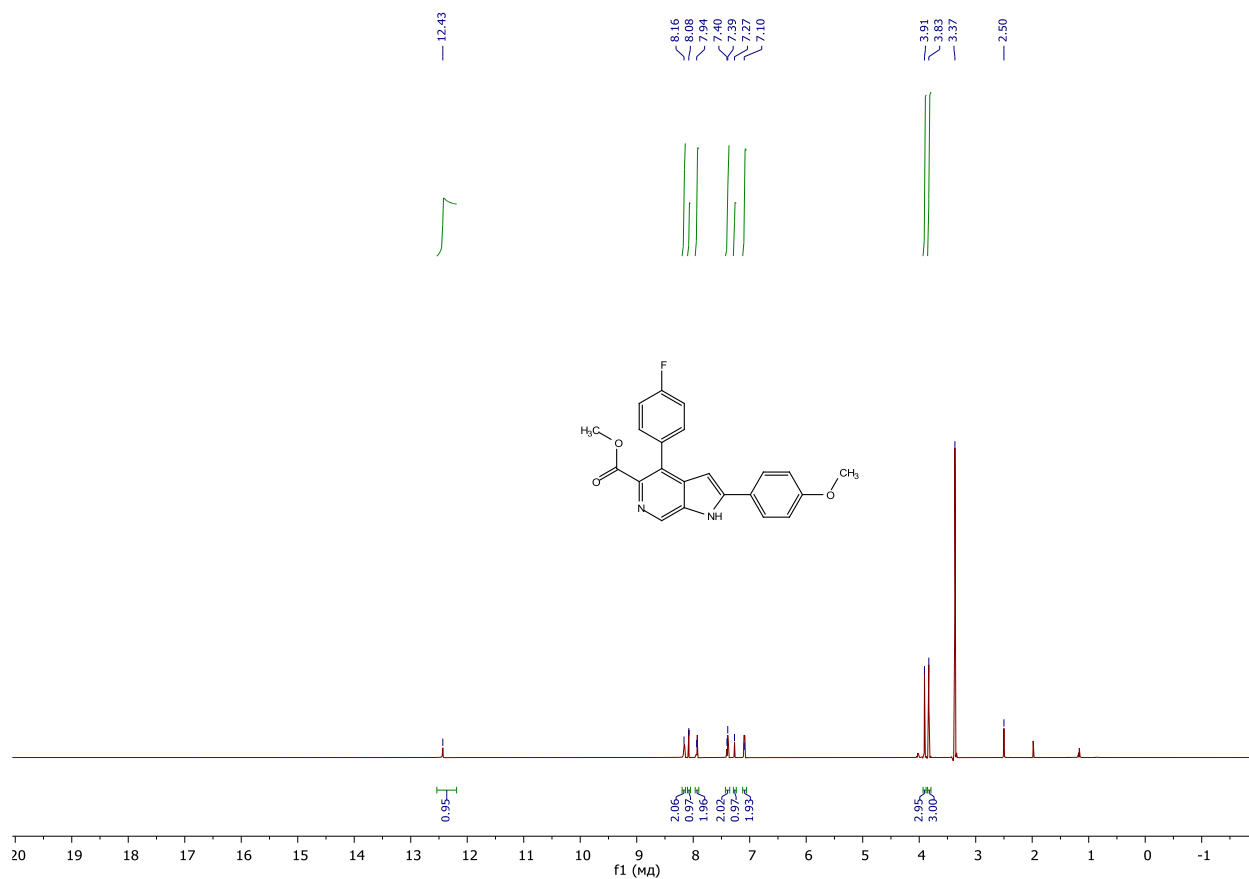

### 6c <sup>13</sup>C NMR

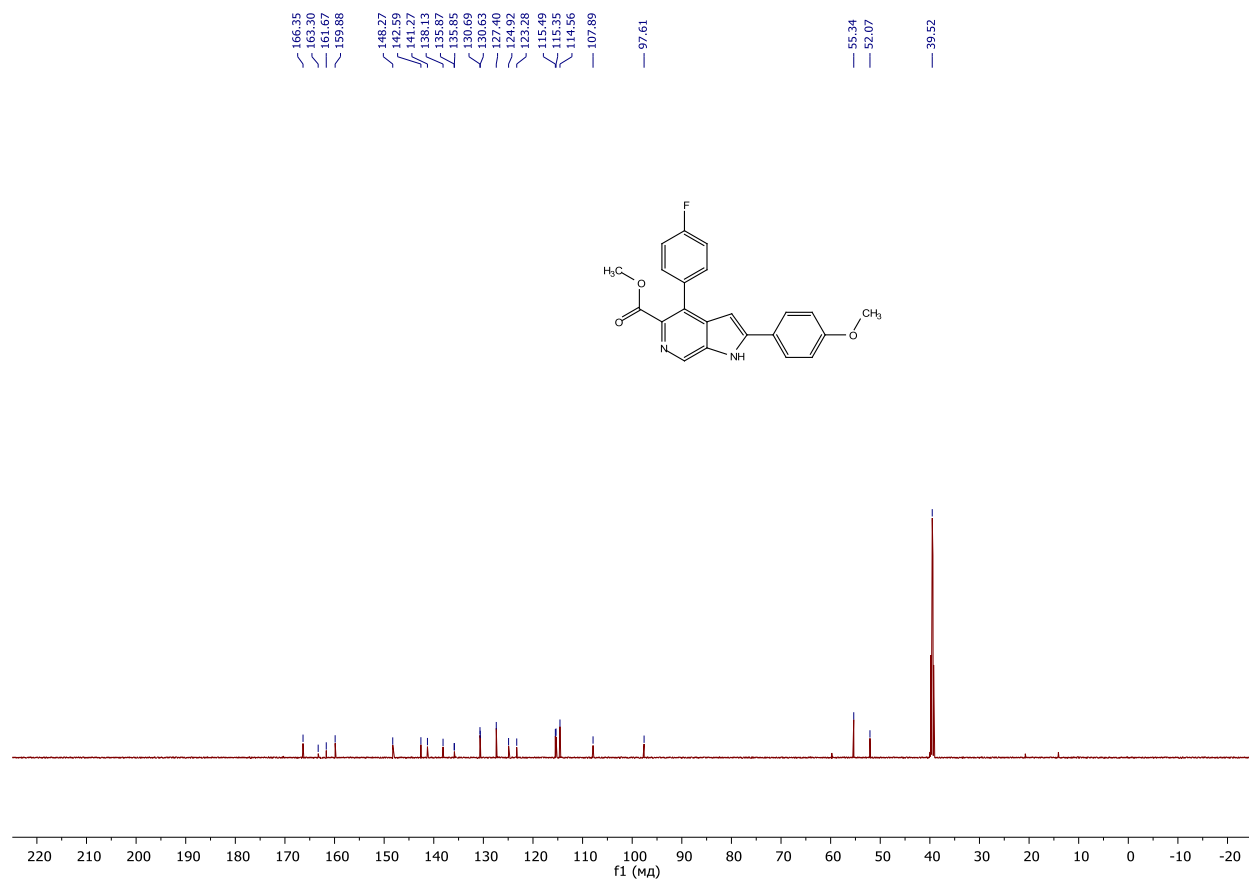

**6d** <sup>1</sup>H NMR

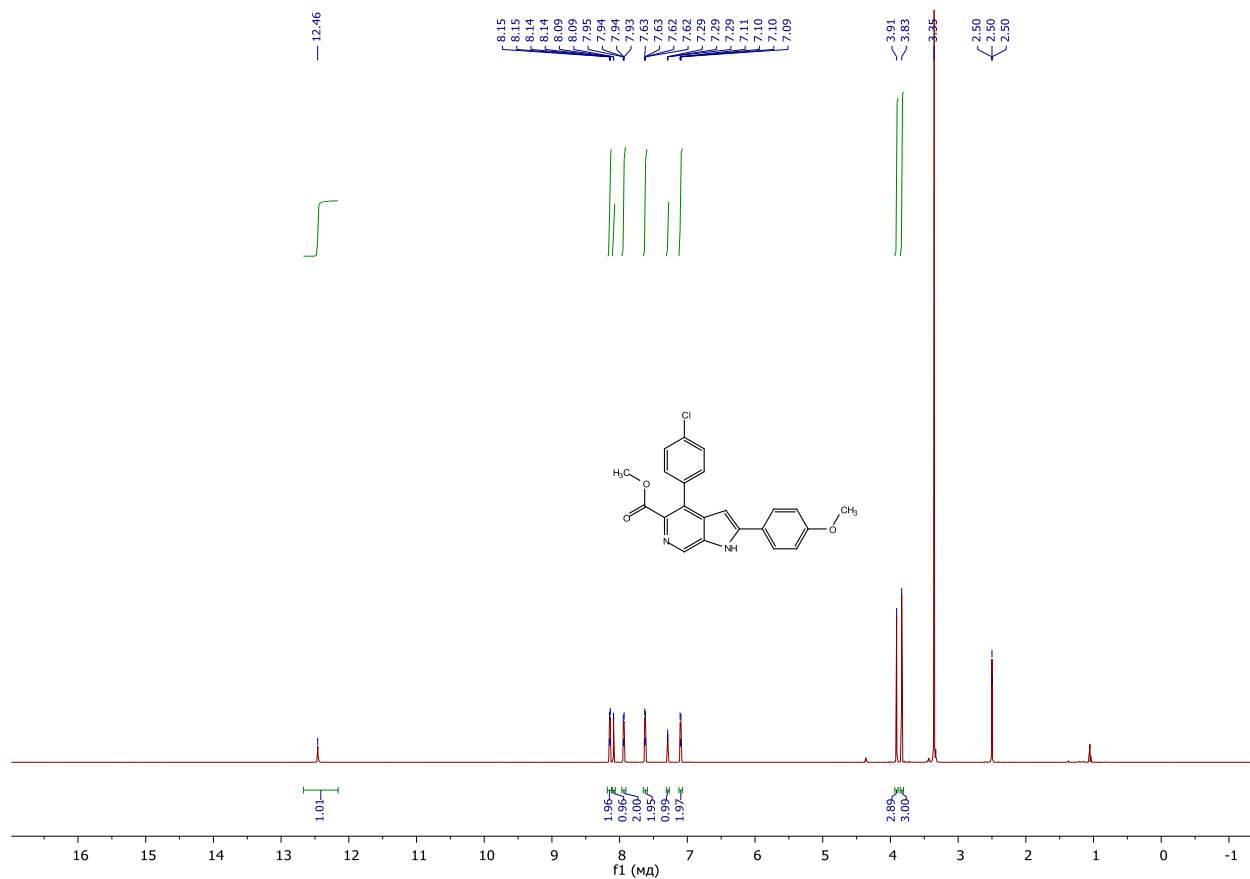

**6d** <sup>13</sup>C NMR

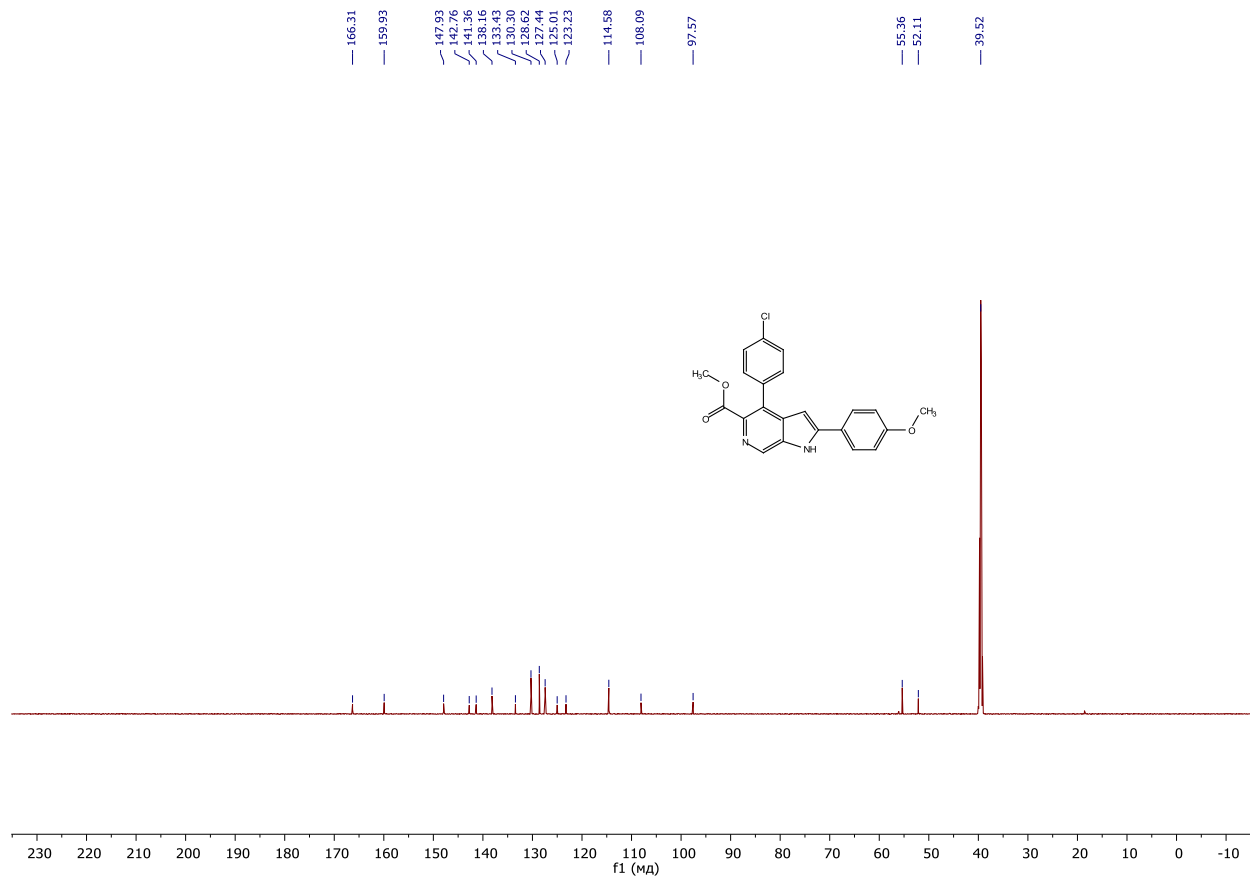



### 6e <sup>1</sup>H NMR

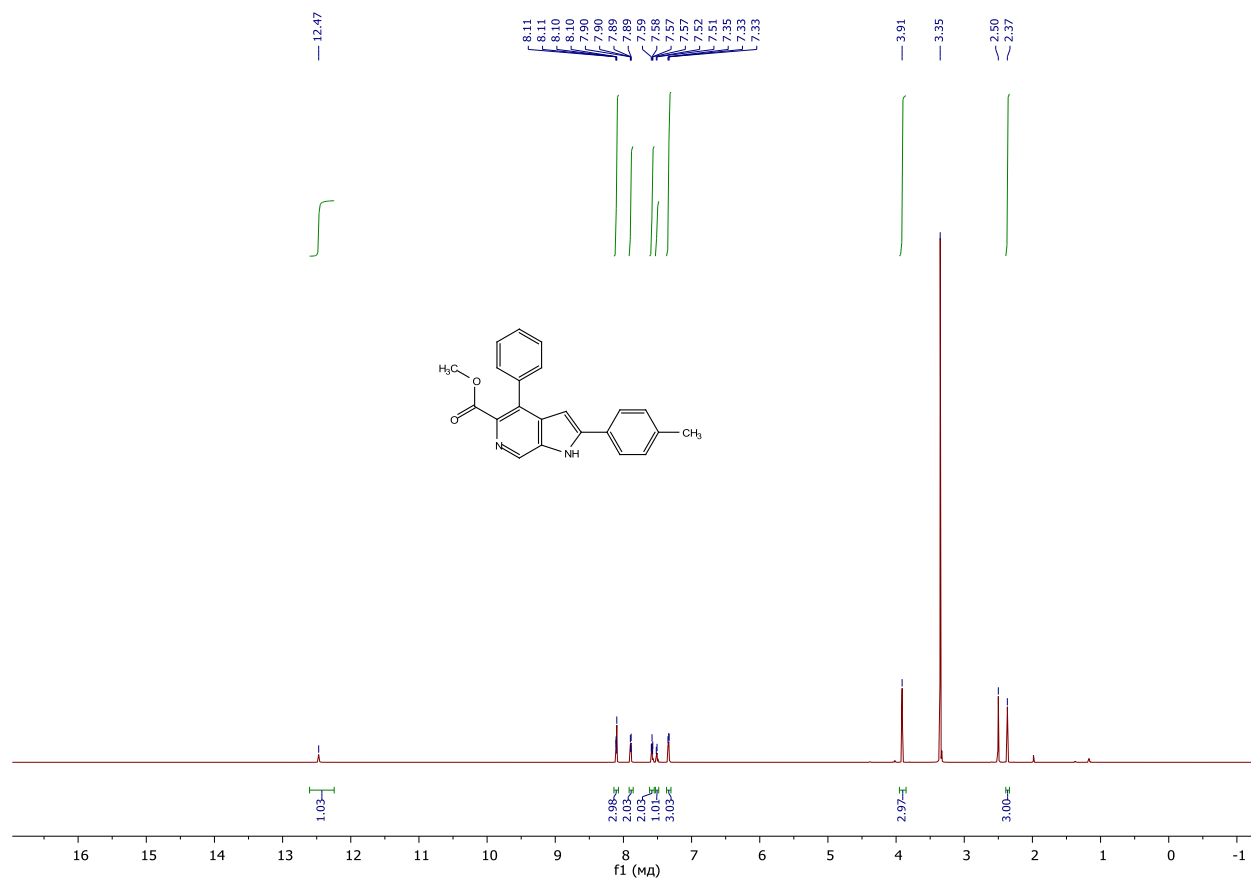

### 6e <sup>13</sup>C NMR

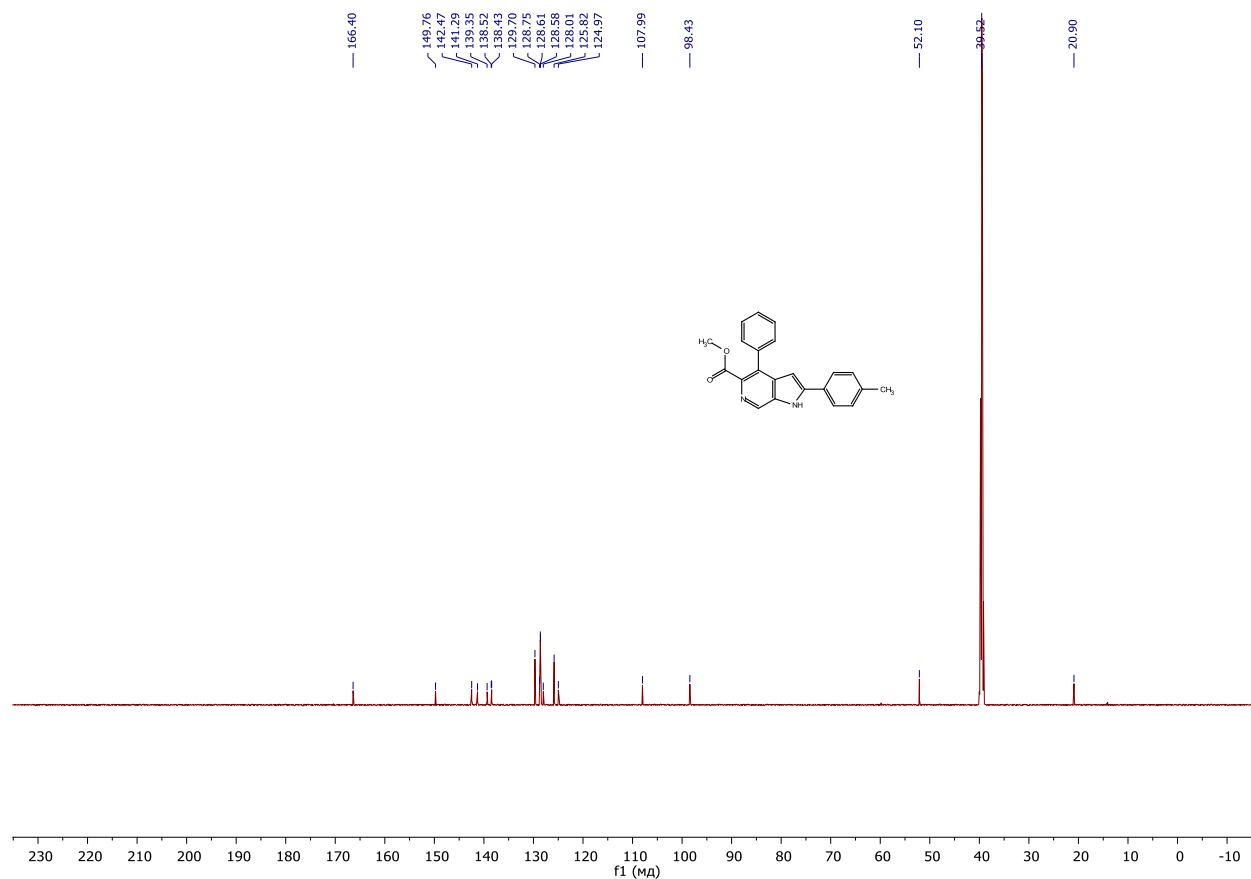

**6f** <sup>1</sup>H NMR

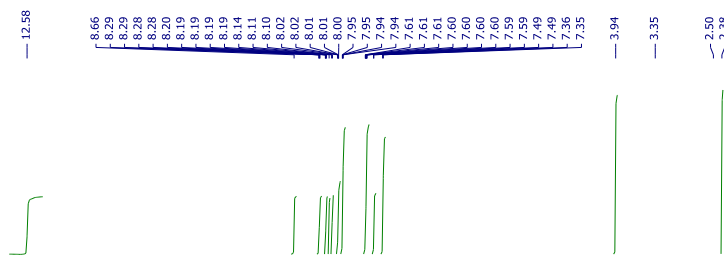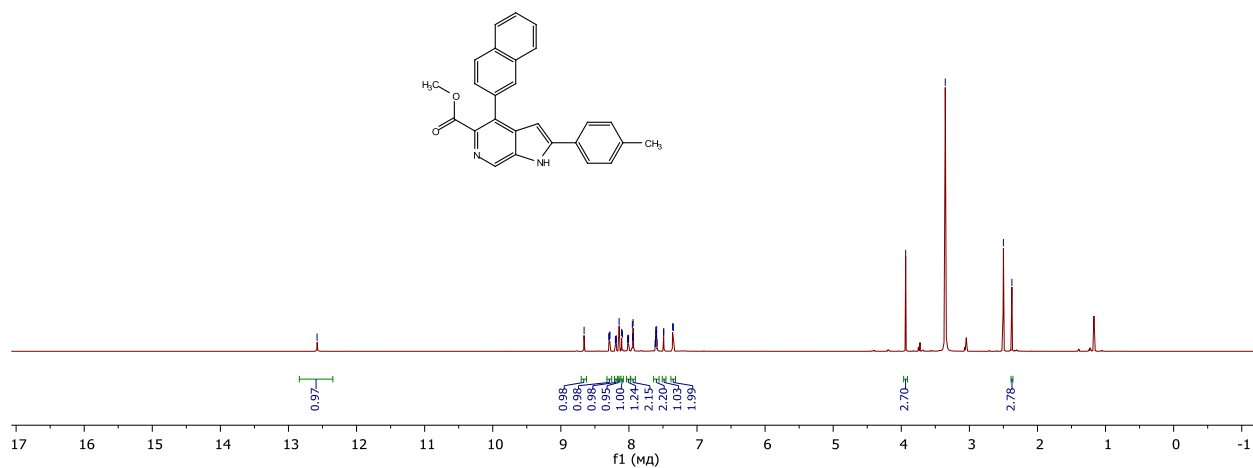

**6f** <sup>13</sup>C NMR

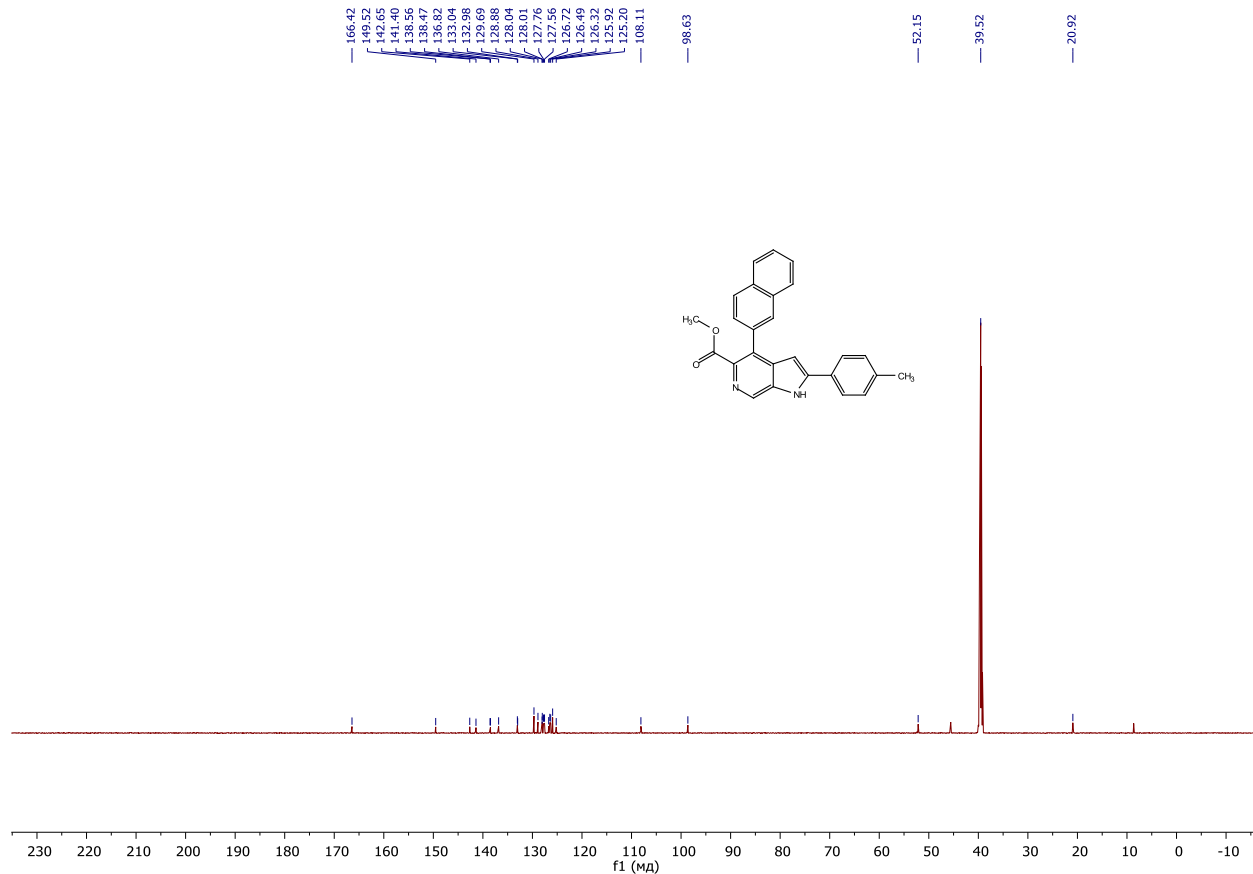

#### 4. Computational Details

All DFT static calculations have been performed with Gaussian16 package,<sup>S2</sup> using the B3LYP functional of Becke and Perdew.<sup>S3,S4</sup> The split-valence basis set Def2-SVP from Ahlrichs and co-workers was used for all atoms.<sup>S5</sup> Stationary points were characterized using vibrational analysis, and this analysis has been also used to calculate zero-point energies and thermal (enthalpy and entropy) corrections (298.15 K, 1 bar). Improved electronic energies were obtained from single-point energy calculations using a Def2-TZVP<sup>S6,S7</sup> basis set on all the atoms, a solvation contribution (PCM model,<sup>S8</sup> ethanol) and the dispersion corrections through the Grimme D3BJ method.<sup>S9</sup> These energies added to the Def2-SVP-level thermal corrections are named  $\Delta G$ .

#### 5. Additional Figures

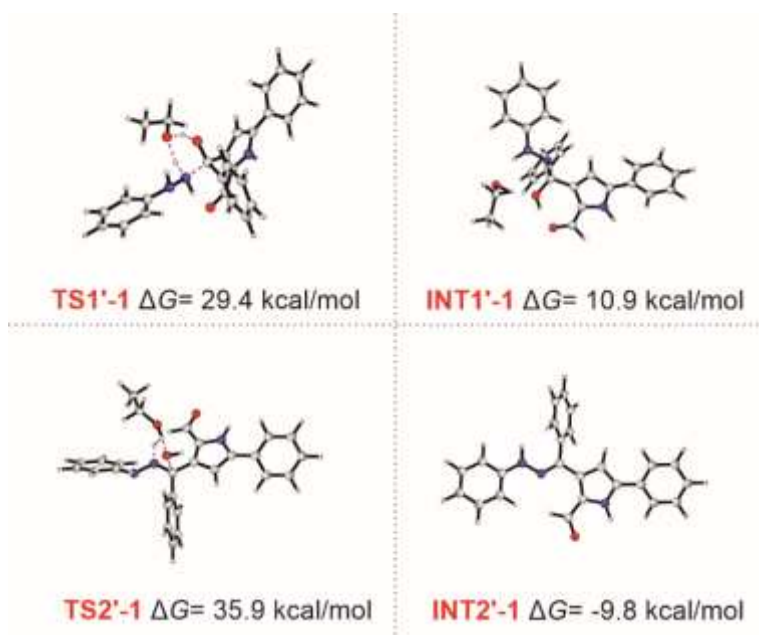

**Figure S1.** Optimized structures of transition states and intermediates leading to formation of hydrazone at ketone moiety of pyrrolo-2,3-dicarbonyl **2a** in the reaction with phenyl hydrazine.

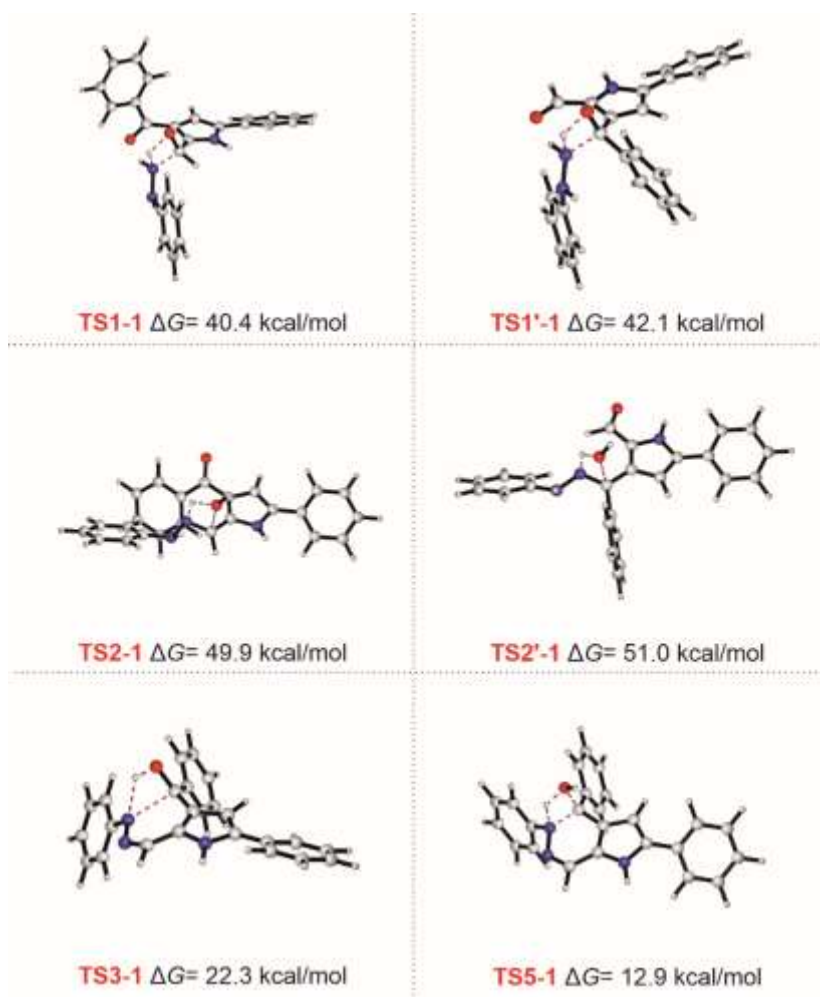

**Figure S2.** Optimized structures of the non-assisted transition states involved in the reaction between pyrrolo-2,3-dicarbonyl **2a** and phenyl hydrazine.

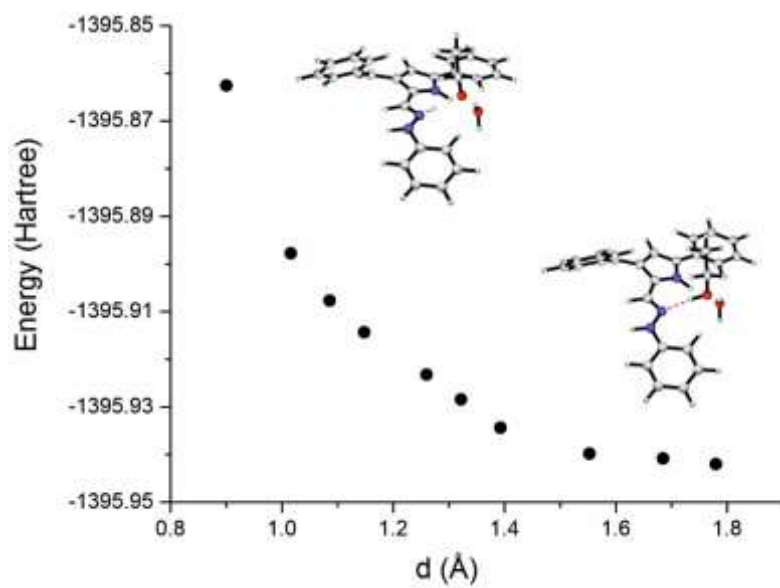

**Figure S3.** Deprotonation by ethoxide leading to **INT2-1**.

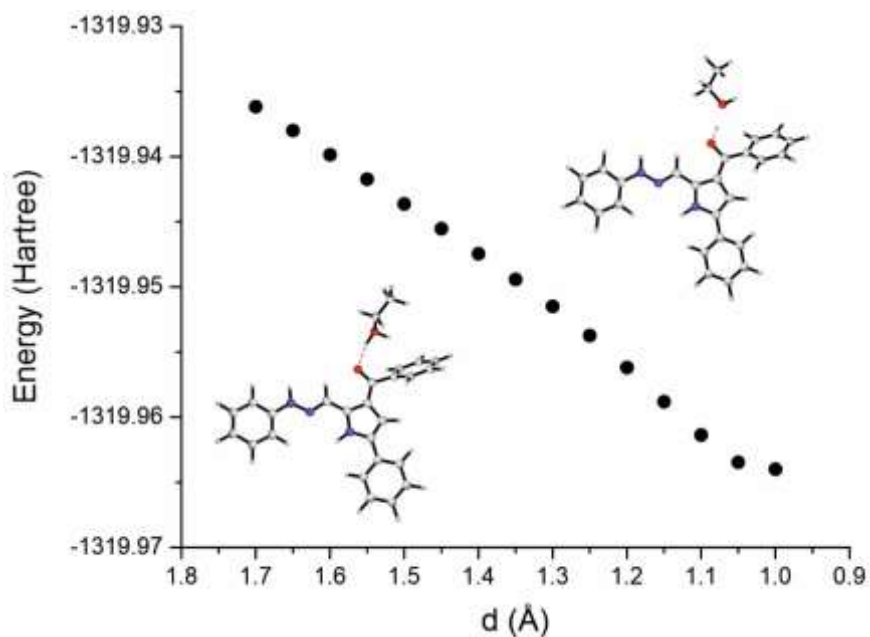

**Figure S4.** Protonation of **INT2-1** by  $\text{EtOH}_2^+$  acid to generate **INT4-1**.

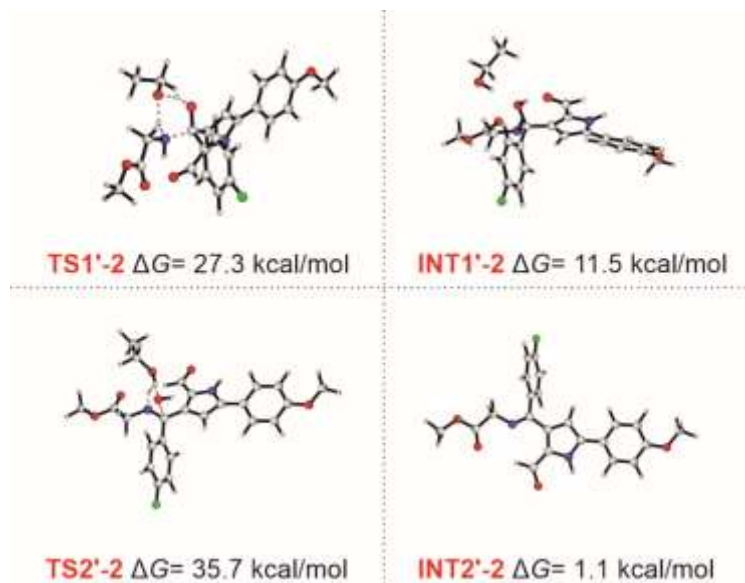

**Figure S5.** Optimized structures of transition states and intermediates leading to formation of hydrazone at ketone moiety of pyrrolo-2,3-dicarbonyl **2f** in the reaction with glycine methyl ester.

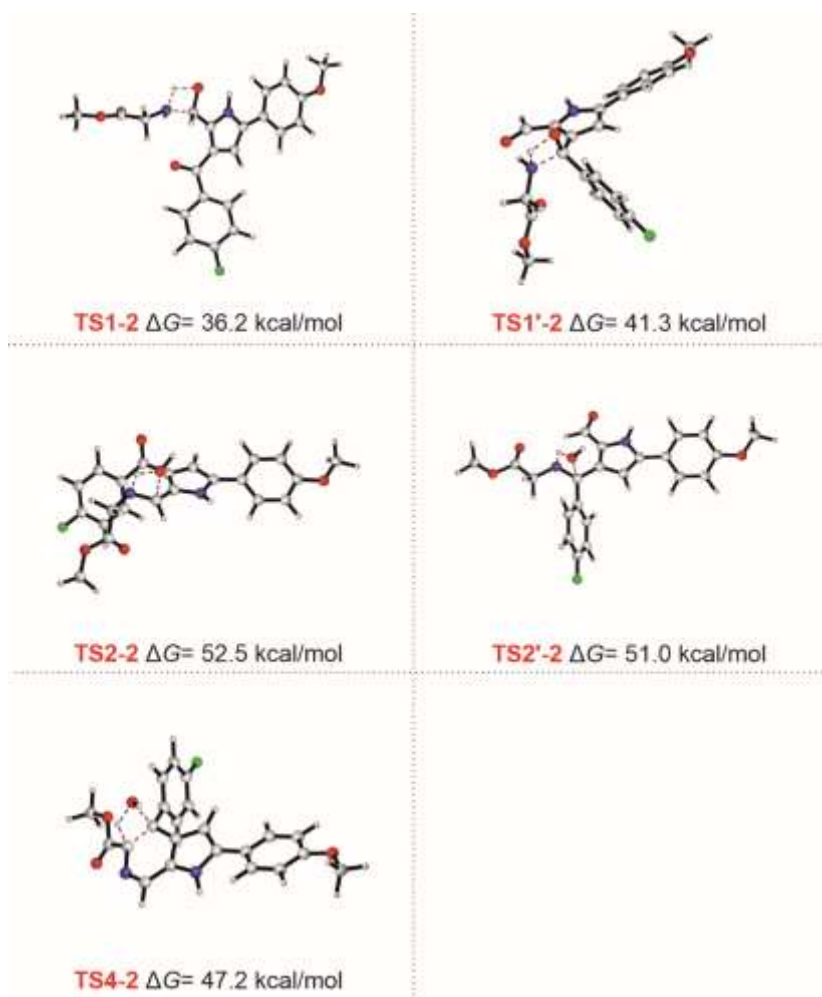

**Figure S6.** Optimized structures of the non-assisted transition states involved in the reaction between pyrrolo-2,3-dicarbonyl **2f** and glycine methyl ester.

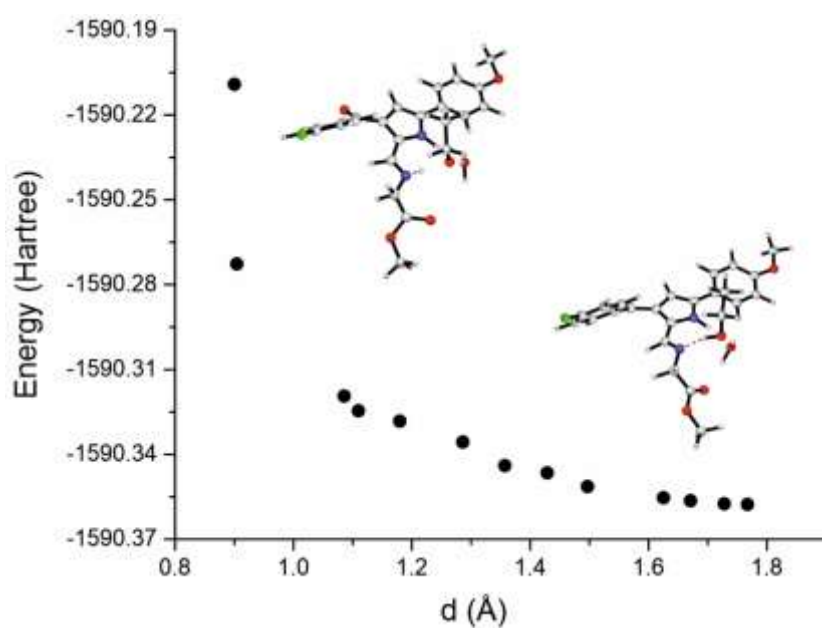

**Figure S7.** Deprotonation by ethoxide leading to INT2-2.

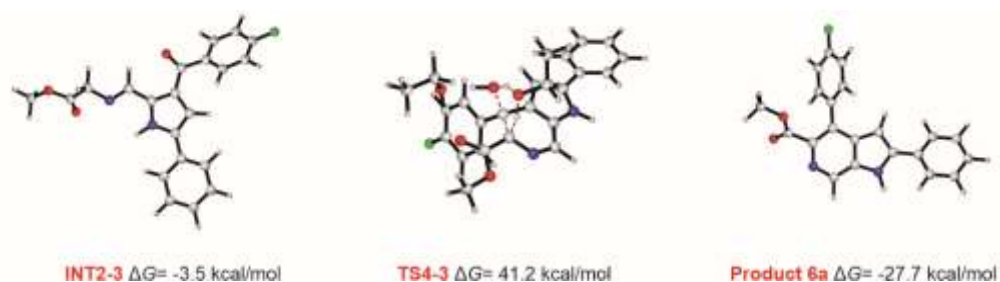

**Figure S8.** Optimized structures of the lowest energy intermediate, rate determining step and product of the reaction between pyrrolo-2,3-dicarbonyl **2a** and glycine methyl ester.

## 6. Cartesian Coordinates

### Mechanism 1 (leading to product **4a**)

#### Pyrrolo-2,3-dicarbonyl **2a**

E=-899,368558264

|   |             |             |             |
|---|-------------|-------------|-------------|
| C | -0.11787600 | 1.06041200  | -0.67770000 |
| C | -0.39839300 | -0.30182800 | -0.46208600 |
| C | 0.83109300  | -0.93119300 | -0.16076600 |
| H | 1.73361100  | 2.09215500  | -0.66298200 |
| H | 0.95507000  | -1.98634500 | 0.07017300  |
| C | 3.27387600  | -0.07839600 | 0.10710700  |
| C | 4.03529800  | 1.02869600  | 0.53118900  |
| C | 3.92616500  | -1.31756400 | -0.04812200 |
| C | 5.40310400  | 0.90364900  | 0.77950400  |
| H | 3.55199700  | 1.99503200  | 0.69916500  |
| C | 5.29112500  | -1.44152800 | 0.20896300  |
| H | 3.35876200  | -2.18481900 | -0.39207700 |
| C | 6.03738700  | -0.33180700 | 0.62032600  |
| H | 5.97398200  | 1.77462900  | 1.11101400  |
| H | 5.77859000  | -2.41091600 | 0.07864000  |
| H | 7.10749400  | -0.43037900 | 0.81786700  |
| C | -1.68030800 | -1.06996700 | -0.59337200 |
| C | -2.93476300 | -0.59422500 | 0.07106600  |
| C | -2.94019600 | 0.37871500  | 1.08303800  |
| C | -4.14431300 | -1.21112400 | -0.29335100 |
| C | -4.13387100 | 0.73332200  | 1.71423400  |
| H | -2.00486500 | 0.85161100  | 1.38770700  |
| C | -5.33788500 | -0.84633900 | 0.32625400  |
| H | -4.12003000 | -1.97776000 | -1.07006100 |
| C | -5.33454400 | 0.12688100  | 1.33297900  |
| H | -4.12825300 | 1.48757200  | 2.50511300  |
| H | -6.27568200 | -1.32220900 | 0.02834800  |
| H | -6.26980500 | 0.41101100  | 1.82263700  |
| O | -1.65701000 | -2.12646200 | -1.20228700 |
| C | -0.92829300 | 2.17605500  | -1.14896400 |
| H | -0.35104600 | 3.13916100  | -1.23373600 |
| O | -2.10351000 | 2.13045100  | -1.44195200 |
| C | 1.83753200  | 0.03909900  | -0.16547700 |

N 1.23764600 1.22745700 -0.47954700

**Phenyl hydrazine**

E= -343,089432476

N -2.83348600 0.31294400 0.11211100  
H -2.63953100 0.88907100 0.93708300  
H -2.93979900 0.93985100 -0.68643400  
N -1.81199100 -0.60068900 -0.12317600  
H -2.06099600 -1.55483900 0.11082300  
C -0.46480900 -0.27446400 -0.05134300  
C -0.02149000 1.06320500 -0.05330700  
C 0.50259400 -1.30269600 -0.00404200  
C 1.34515700 1.35380200 -0.01207400  
H -0.74895800 1.87530400 -0.09346700  
C 1.86030600 -0.99761000 0.03597300  
H 0.17405200 -2.34645200 -0.00053600  
C 2.29756600 0.33366900 0.03262900  
H 1.66486600 2.39967000 -0.01569100  
H 2.58905100 -1.81211300 0.07323400  
H 3.36371300 0.56828500 0.06542000

**TS1-1 (non-assisted)**

E=-1242,41491183

C -0.12036300 0.22183600 -0.35137200  
C 1.00296100 -0.55679800 -0.00400900  
C 2.08389300 0.35682500 0.22296500  
H -0.32685400 2.29363500 -0.56971200  
H 3.09194000 0.09319000 0.53095100  
C 2.29494900 2.94159300 0.10224700  
C 1.81330500 4.07536300 -0.58244500  
C 3.46077200 3.08495200 0.88174100  
C 2.46601700 5.30566100 -0.48375200  
H 0.93316400 3.99673100 -1.22651900  
C 4.11693600 4.31201200 0.97011300  
H 3.84402700 2.22664100 1.43775300  
C 3.62193400 5.43118900 0.29146700  
H 2.07351800 6.16903900 -1.02706500  
H 5.01789500 4.39837700 1.58299300  
H 4.13442200 6.39330000 0.36600600  
C 1.02268600 -2.01176000 0.19495800  
C 2.31243000 -2.76617200 0.07257400  
C 3.34772400 -2.36793800 -0.79114300  
C 2.45010900 -3.96282000 0.79935000  
C 4.50306900 -3.14470300 -0.91136300  
H 3.23600700 -1.46547200 -1.39405300  
C 3.61104300 -4.72639900 0.69183800  
H 1.62775100 -4.27731700 1.44455200  
C 4.64104900 -4.31805700 -0.16430300  
H 5.29592400 -2.83486900 -1.59673100  
H 3.71365800 -5.64759100 1.27098300  
H 5.54864300 -4.92059600 -0.25493500  
O 0.00324100 -2.64482000 0.49450800  
C -1.51341800 -0.09712200 -0.84338400



|   |             |             |             |
|---|-------------|-------------|-------------|
| O | -1.61461000 | -0.73132700 | -2.01805400 |
| H | -2.13128300 | 0.82959200  | -0.70240900 |
| N | -2.25037400 | -1.21267100 | -0.00326800 |
| H | -2.37400500 | -1.52894600 | -1.16312700 |
| H | -1.52185900 | -1.85656000 | 0.37991800  |
| N | -3.26209900 | -0.98890000 | 0.92207900  |
| H | -2.93772900 | -0.78890900 | 1.86355400  |
| C | -4.46115300 | -0.38598900 | 0.52714000  |
| C | -5.37768700 | 0.00446100  | 1.52330100  |
| C | -4.79894500 | -0.20166500 | -0.82703200 |
| C | -6.60826600 | 0.55523300  | 1.17101500  |
| H | -5.12257800 | -0.13843500 | 2.57756600  |
| C | -6.04027100 | 0.34768800  | -1.16093800 |
| H | -4.09083300 | -0.46450100 | -1.61565200 |
| C | -6.95296200 | 0.72855800  | -0.17445600 |
| H | -7.30669600 | 0.84972300  | 1.95887900  |
| H | -6.28729100 | 0.48478400  | -2.21705500 |
| H | -7.91881400 | 1.15910900  | -0.44777100 |
| C | 1.61911200  | 1.64361500  | 0.00885800  |
| N | 0.28710200  | 1.51883800  | -0.34595200 |

**TS1-1 (assisted by EtOH)**

E= -1397,58286941

|   |             |             |             |
|---|-------------|-------------|-------------|
| C | 0.29893200  | -0.43800700 | -0.32409900 |
| C | 0.66924600  | 0.86038700  | 0.08652700  |
| C | 2.10107900  | 0.91477100  | -0.00146100 |
| H | 1.36380000  | -2.04184400 | -1.01709500 |
| H | 2.72981500  | 1.74632800  | 0.30478700  |
| C | 3.91437800  | -0.81116700 | -0.69382300 |
| C | 4.18376000  | -2.18895700 | -0.81266300 |
| C | 4.99367800  | 0.08780500  | -0.80912800 |
| C | 5.48183600  | -2.64898500 | -1.04152700 |
| H | 3.37725700  | -2.91849000 | -0.70578200 |
| C | 6.29036400  | -0.37450000 | -1.02947700 |
| H | 4.81017400  | 1.16211900  | -0.73947700 |
| C | 6.54254100  | -1.74562500 | -1.14968100 |
| H | 5.66492500  | -3.72301500 | -1.12791000 |
| H | 7.11084000  | 0.34242000  | -1.11666100 |
| C | -0.25135800 | 1.88892500  | 0.57426600  |
| C | 0.15123100  | 3.33143400  | 0.57647700  |
| C | 1.03105200  | 3.88081800  | -0.37296300 |
| C | -0.43922500 | 4.17855400  | 1.53247200  |
| C | 1.32372800  | 5.24689100  | -0.35503700 |
| H | 1.46348900  | 3.24463800  | -1.14658100 |
| C | -0.13112100 | 5.53746800  | 1.55991800  |
| H | -1.14041800 | 3.74667900  | 2.24884100  |
| C | 0.75197600  | 6.07469900  | 0.61552500  |
| H | 1.99716200  | 5.66734700  | -1.10605700 |
| H | -0.58384300 | 6.18396500  | 2.31585600  |
| O | -1.37579000 | 1.59457700  | 1.00851000  |
| C | -1.00138600 | -1.18644300 | -0.58998500 |
| N | -1.85904400 | -1.09639900 | 0.69328900  |

|   |             |             |             |
|---|-------------|-------------|-------------|
| H | -1.34386700 | -1.85774400 | 1.34490100  |
| C | 2.55541100  | -0.31506100 | -0.45354400 |
| N | 1.43249100  | -1.09764400 | -0.64175500 |
| O | -0.78799400 | -2.48814300 | -0.89390300 |
| H | -1.57800900 | -0.65998100 | -1.37574300 |
| H | -1.83968000 | -0.11683600 | 1.05028300  |
| H | -0.69551500 | -3.02116400 | 0.14901900  |
| O | -0.83422500 | -3.21942800 | 1.38264000  |
| C | 0.22210900  | -3.76311300 | 2.12146700  |
| H | 0.48742100  | -4.76527100 | 1.72288000  |
| H | 1.14728200  | -3.14808400 | 2.03564200  |
| C | -0.14332800 | -3.90469500 | 3.59510400  |
| H | -1.04547600 | -4.52778200 | 3.70480100  |
| H | 0.67522500  | -4.37026700 | 4.16926300  |
| H | -0.35790100 | -2.91996600 | 4.04305700  |
| N | -3.17318600 | -1.60956100 | 0.57882500  |
| H | 7.55860900  | -2.10638300 | -1.32674400 |
| H | 0.98845000  | 7.14178300  | 0.63225700  |
| C | -4.08488800 | -1.02804800 | -0.32066700 |
| C | -5.02875300 | -1.85833100 | -0.95230400 |
| C | -4.13812900 | 0.36057400  | -0.54039600 |
| C | -6.01064300 | -1.31042800 | -1.77694200 |
| H | -4.98606700 | -2.93919300 | -0.79167800 |
| C | -5.11831100 | 0.89331700  | -1.38172700 |
| H | -3.42605600 | 1.02750000  | -0.05109200 |
| C | -6.06117600 | 0.06916600  | -2.00217600 |
| H | -6.73616500 | -1.97231100 | -2.25702800 |
| H | -5.14492600 | 1.97396000  | -1.54486400 |
| H | -6.82576800 | 0.49578700  | -2.65525900 |
| H | -3.10653200 | -2.62368900 | 0.52496300  |

### TS1'-1 (non-assisted)

E=-1242,41127049

|   |             |             |             |
|---|-------------|-------------|-------------|
| C | -0.89230200 | -1.35141700 | 1.36953200  |
| C | -0.49657300 | -0.03658700 | 1.01913900  |
| C | -1.59370200 | 0.53868800  | 0.34733300  |
| H | -2.73969000 | -2.35990200 | 1.05653000  |
| H | -1.62737200 | 1.54365600  | -0.06413700 |
| C | -3.97038600 | -0.28987900 | -0.31069200 |
| C | -4.70039800 | -1.43199300 | -0.69569900 |
| C | -4.55272300 | 0.97611100  | -0.51876200 |
| C | -5.97217600 | -1.31288700 | -1.25760400 |
| H | -4.26273400 | -2.42774600 | -0.58391700 |
| C | -5.82109100 | 1.09260100  | -1.08655800 |
| H | -4.01195400 | 1.87405900  | -0.21342300 |
| C | -6.53857800 | -0.05019500 | -1.45586300 |
| H | -6.51918400 | -2.21189000 | -1.55243400 |
| H | -6.25662300 | 2.08387200  | -1.23476300 |
| H | -7.53339600 | 0.04311600  | -1.89803600 |
| C | 0.72550900  | 0.75751500  | 1.45882300  |
| C | 1.06329200  | 1.90550600  | 0.50571900  |
| C | 1.18940100  | 1.73398200  | -0.88267300 |

|   |             |             |             |
|---|-------------|-------------|-------------|
| C | 1.28712900  | 3.17292700  | 1.05888600  |
| C | 1.53332400  | 2.81381500  | -1.70091000 |
| H | 1.01799700  | 0.75133500  | -1.32977700 |
| C | 1.62644900  | 4.25518700  | 0.24049100  |
| H | 1.17730300  | 3.27483000  | 2.14059400  |
| C | 1.75157800  | 4.07795800  | -1.14079300 |
| H | 1.63133800  | 2.66784500  | -2.77996300 |
| H | 1.79103900  | 5.24163900  | 0.68262100  |
| H | 2.01702800  | 4.92278500  | -1.78203400 |
| O | 0.71168000  | 1.05736000  | 2.76491300  |
| C | -0.25111100 | -2.44859200 | 2.03952800  |
| O | 0.92235900  | -2.51907100 | 2.39671100  |
| H | -0.92317100 | -3.32654400 | 2.21802600  |
| N | 2.12322200  | -0.13693500 | 1.61266100  |
| H | 1.86410200  | -1.11517700 | 1.85035100  |
| H | 1.92484300  | 0.47831900  | 2.64890100  |
| N | 3.24710900  | -0.06696300 | 0.80069200  |
| H | 3.54751200  | 0.89347500  | 0.66991900  |
| C | 3.44115100  | -0.90397100 | -0.30771700 |
| C | 4.26408900  | -0.45085800 | -1.35799300 |
| C | 2.89932600  | -2.19994500 | -0.38122800 |
| C | 4.54165600  | -1.27538200 | -2.44684200 |
| H | 4.68445600  | 0.55793200  | -1.31428300 |
| C | 3.17936600  | -3.01157700 | -1.48378400 |
| H | 2.28068100  | -2.58759200 | 0.42870100  |
| C | 3.99877800  | -2.56286200 | -2.52274300 |
| H | 5.18416800  | -0.90233300 | -3.24895500 |
| H | 2.75161000  | -4.01713900 | -1.52112700 |
| H | 4.21373100  | -3.20636500 | -3.37872000 |
| C | -2.63598000 | -0.39836800 | 0.28795400  |
| N | -2.19035500 | -1.52226600 | 0.90774500  |

**TS1'-1 (assisted by EtOH)**

E= -1397,57237784

|   |             |             |             |
|---|-------------|-------------|-------------|
| C | -1.12929700 | -0.02634300 | -1.49820600 |
| C | -0.85316200 | 0.24285800  | -0.13502100 |
| C | -2.07125100 | 0.14036800  | 0.55423100  |
| H | -2.96276900 | -0.57626400 | -2.43128100 |
| H | -2.18876300 | 0.30308200  | 1.62176800  |
| C | -4.51852200 | -0.38632300 | -0.15233300 |
| C | -5.44811700 | -0.23494700 | -1.20025300 |
| C | -4.99845000 | -0.74367600 | 1.12302600  |
| C | -6.81013100 | -0.44661800 | -0.98288400 |
| H | -5.11229800 | 0.08162500  | -2.19148700 |
| C | -6.36084600 | -0.94847400 | 1.33860200  |
| H | -4.29300600 | -0.87877800 | 1.94524500  |
| C | -7.27241000 | -0.80447300 | 0.28714700  |
| H | -7.51559400 | -0.31964500 | -1.80775100 |
| H | -6.71329500 | -1.22960800 | 2.33401000  |
| H | -8.33928200 | -0.96734600 | 0.45779800  |
| C | 0.43258500  | 0.64817100  | 0.60703800  |

|   |             |             |             |
|---|-------------|-------------|-------------|
| C | 0.66191500  | 2.16517000  | 0.48943600  |
| C | 0.92196900  | 2.79332100  | -0.73826800 |
| C | 0.57523000  | 2.94485800  | 1.64899000  |
| C | 1.09622200  | 4.17747200  | -0.80018200 |
| H | 1.00779000  | 2.20588500  | -1.65466900 |
| C | 0.74286400  | 4.33158900  | 1.58443100  |
| H | 0.37994600  | 2.44050800  | 2.59585800  |
| C | 1.00381100  | 4.95261200  | 0.36066200  |
| H | 1.30907400  | 4.65259400  | -1.76141200 |
| H | 0.67181300  | 4.92851700  | 2.49770300  |
| H | 1.13852100  | 6.03627800  | 0.30978300  |
| O | 0.40453700  | 0.24373300  | 1.90094700  |
| C | -0.32298800 | -0.12124600 | -2.68401700 |
| O | 0.89729200  | 0.01804300  | -2.75797300 |
| H | -0.90037900 | -0.34676000 | -3.61538800 |
| N | 1.59142400  | -0.13623000 | -0.06396400 |
| H | 1.57407000  | -0.00529400 | -1.09380400 |
| H | 1.34547500  | -1.19852400 | 0.30889300  |
| N | 2.83832600  | 0.28314900  | 0.48272100  |
| H | 2.71053700  | 0.34353700  | 1.49330400  |
| H | 0.52803100  | -0.92376200 | 1.83144300  |
| O | 0.91860600  | -2.02891500 | 1.37345600  |
| C | 0.02188800  | -3.09740000 | 1.27085300  |
| H | -0.55401900 | -3.20171300 | 2.21445500  |
| H | -0.73838400 | -2.92886600 | 0.47352000  |
| C | 0.75310400  | -4.40705300 | 0.99245600  |
| H | 1.30057900  | -4.35342800 | 0.03676900  |
| H | 0.05217500  | -5.25765800 | 0.94107500  |
| H | 1.48975900  | -4.60637900 | 1.78699200  |
| C | 3.98064000  | -0.43349800 | 0.09097800  |
| C | 5.07461200  | -0.48992500 | 0.97563100  |
| C | 4.09838700  | -1.02971300 | -1.17734400 |
| C | 6.25715500  | -1.12116500 | 0.59615100  |
| H | 4.98829200  | -0.03216300 | 1.96498000  |
| C | 5.28857400  | -1.66617200 | -1.54119500 |
| H | 3.27390600  | -0.99334200 | -1.89173700 |
| C | 6.37466500  | -1.71723800 | -0.66489400 |
| H | 7.09398600  | -1.15461200 | 1.29884000  |
| H | 5.36144000  | -2.12598200 | -2.53037900 |
| H | 7.30104400  | -2.21627700 | -0.95787000 |
| C | -3.08315600 | -0.17612200 | -0.36530700 |
| N | -2.49601800 | -0.26330400 | -1.58825200 |

### INT1-1

E=-1242,47101144

|   |             |             |             |
|---|-------------|-------------|-------------|
| C | -0.27395700 | -0.92688700 | -0.31199500 |
| C | -0.58815200 | 0.44396100  | -0.41388200 |
| C | -2.00866600 | 0.54689300  | -0.24245900 |
| H | -1.43663000 | -2.58269900 | 0.09996600  |
| H | -2.59564200 | 1.45682100  | -0.33142300 |
| C | -3.89403100 | -1.19436400 | 0.15432900  |
| C | -4.24456100 | -2.54755700 | -0.02334400 |

|   |             |             |             |
|---|-------------|-------------|-------------|
| C | -4.91065600 | -0.29138000 | 0.52613200  |
| C | -5.55767000 | -2.98130400 | 0.16833900  |
| H | -3.49069900 | -3.27422800 | -0.33701900 |
| C | -6.22304100 | -0.72496400 | 0.70814000  |
| H | -4.66357300 | 0.75992800  | 0.68831300  |
| C | -6.55496800 | -2.07314200 | 0.53348100  |
| H | -5.80337300 | -4.03630200 | 0.02239500  |
| H | -6.99304300 | -0.00523200 | 0.99772600  |
| C | 0.34273800  | 1.54430100  | -0.71152500 |
| C | -0.01246700 | 2.95033400  | -0.31806700 |
| C | -0.78591800 | 3.25953700  | 0.81435500  |
| C | 0.52807600  | 3.99999900  | -1.08301900 |
| C | -1.02453800 | 4.59153400  | 1.16376400  |
| H | -1.17839400 | 2.45730500  | 1.44123700  |
| C | 0.27295000  | 5.32771300  | -0.74408900 |
| H | 1.15125000  | 3.74840300  | -1.94323700 |
| C | -0.50491400 | 5.62652200  | 0.38108700  |
| H | -1.61468400 | 4.82149800  | 2.05449500  |
| H | 0.68615900  | 6.13513700  | -1.35389400 |
| O | 1.41215500  | 1.35260300  | -1.29421800 |
| C | 0.99940300  | -1.75835900 | -0.26840500 |
| N | 1.87476600  | -1.46265000 | -1.38028200 |
| C | -2.51880700 | -0.72538800 | -0.04095300 |
| N | -1.43772300 | -1.58385800 | -0.08138500 |
| O | 0.66037700  | -3.14165100 | -0.29822000 |
| H | 1.49186100  | -1.61637800 | 0.71461000  |
| H | 1.85029100  | -0.47319400 | -1.64423800 |
| H | 0.55436300  | -3.34814600 | -1.24180900 |
| N | 3.17816900  | -1.95281400 | -1.26565600 |
| H | -7.58308600 | -2.41227600 | 0.68113300  |
| H | -0.69920000 | 6.66765700  | 0.65178300  |
| C | 4.05787000  | -1.54995200 | -0.25503300 |
| C | 5.08362100  | -2.42538900 | 0.15655000  |
| C | 3.99503000  | -0.26546300 | 0.32032500  |
| C | 6.01867400  | -2.02639000 | 1.11023200  |
| H | 5.14131000  | -3.42695500 | -0.28087400 |
| C | 4.93251400  | 0.11617000  | 1.28320800  |
| H | 3.23155300  | 0.44055700  | -0.00885100 |
| C | 5.94964700  | -0.75335900 | 1.68743900  |
| H | 6.80544700  | -2.72336900 | 1.41206100  |
| H | 4.86762800  | 1.11844000  | 1.71588600  |
| H | 6.67947000  | -0.44448200 | 2.43924400  |
| H | 3.24318600  | -2.93323400 | -1.51437500 |

#### INT1'-1

E=-1242,4690747

|   |             |             |             |
|---|-------------|-------------|-------------|
| C | -1.74536600 | -1.80568000 | -0.90140100 |
| C | -0.77837400 | -0.79750700 | -0.69319400 |
| C | -1.47950500 | 0.36425200  | -0.31872500 |
| H | -3.86672000 | -1.71445600 | -0.77896500 |
| H | -1.02924900 | 1.31693100  | -0.05485500 |
| C | -3.99597400 | 0.92581800  | 0.03652300  |

|   |             |             |             |
|---|-------------|-------------|-------------|
| C | -5.21811100 | 0.38230500  | 0.48011500  |
| C | -3.89029100 | 2.32588100  | -0.08030500 |
| C | -6.30026300 | 1.20940200  | 0.78356400  |
| H | -5.32029500 | -0.69714700 | 0.62094400  |
| C | -4.97103800 | 3.15049500  | 0.23076600  |
| H | -2.95718900 | 2.76759700  | -0.43582200 |
| C | -6.18186500 | 2.59703300  | 0.66054200  |
| H | -7.23777200 | 0.76753800  | 1.13010100  |
| H | -4.86975300 | 4.23388300  | 0.12974200  |
| H | -7.02829300 | 3.24460000  | 0.90144800  |
| C | 0.74085400  | -0.94900500 | -0.77712500 |
| C | 1.27970900  | -1.54686300 | 0.54111500  |
| C | 1.11265000  | -0.85770900 | 1.75192000  |
| C | 1.92909100  | -2.78626500 | 0.55294300  |
| C | 1.58563100  | -1.39729400 | 2.94890700  |
| H | 0.61574900  | 0.11422800  | 1.75509400  |
| C | 2.39905700  | -3.33082100 | 1.75319300  |
| H | 2.07828800  | -3.32246200 | -0.38415700 |
| C | 2.22938500  | -2.63978200 | 2.95434200  |
| H | 1.45436700  | -0.84381900 | 3.88252100  |
| H | 2.90577400  | -4.29953800 | 1.74427600  |
| H | 2.59946200  | -3.06374500 | 3.89154300  |
| O | 1.10999100  | -1.72285000 | -1.89867600 |
| C | -1.65115500 | -3.18556700 | -1.30571500 |
| H | -2.62528300 | -3.73724200 | -1.29969100 |
| O | -0.63025900 | -3.77399800 | -1.64520500 |
| C | -2.85214500 | 0.06926900  | -0.29234000 |
| N | -2.98295200 | -1.24148400 | -0.63276500 |
| N | 1.29421500  | 0.38529200  | -0.96968700 |
| N | 2.67968700  | 0.36056800  | -1.08239600 |
| C | 3.44695300  | 1.43346000  | -0.65813100 |
| C | 2.92439700  | 2.46403700  | 0.14856600  |
| C | 4.80854900  | 1.49155700  | -1.02699100 |
| C | 3.74842000  | 3.50700200  | 0.57595100  |
| H | 1.87330500  | 2.42940800  | 0.43365800  |
| C | 5.61742100  | 2.53921400  | -0.59175200 |
| H | 5.22698800  | 0.70037300  | -1.65635000 |
| C | 5.09792700  | 3.55902300  | 0.21445200  |
| H | 3.32246500  | 4.29503800  | 1.20388200  |
| H | 6.66947600  | 2.55921800  | -0.88990100 |
| H | 5.73444700  | 4.37998800  | 0.55214900  |
| H | 0.62196700  | -2.57645500 | -1.88082700 |
| H | 0.86879900  | 0.77999400  | -1.81642000 |
| H | 3.05322200  | -0.22332800 | -1.82671600 |

**TS2-1 (non-assisted)**

E=-1242,39603572

|   |            |             |             |
|---|------------|-------------|-------------|
| C | 0.99430400 | -0.45319900 | -0.14796700 |
| C | 1.14106500 | 0.77947900  | 0.52140200  |
| C | 2.52967200 | 1.01627400  | 0.64252800  |
| H | 2.45704800 | -1.84889200 | -0.74384200 |
| H | 2.97644300 | 1.90200600  | 1.08713400  |
| C | 4.64983400 | -0.27349100 | -0.12812000 |

|   |             |             |             |
|---|-------------|-------------|-------------|
| C | 5.14750400  | -1.10934600 | -1.14790900 |
| C | 5.57203700  | 0.34123300  | 0.74236900  |
| C | 6.51855700  | -1.33037100 | -1.28546400 |
| H | 4.45971400  | -1.57122900 | -1.86114500 |
| C | 6.94172400  | 0.12493400  | 0.59690600  |
| H | 5.20681700  | 0.97763100  | 1.55108100  |
| C | 7.42209900  | -0.71397300 | -0.41477100 |
| H | 6.88369700  | -1.97955500 | -2.08523400 |
| H | 7.64015000  | 0.60792800  | 1.28481300  |
| C | 0.12494300  | 1.73611800  | 1.06548600  |
| C | -0.99356800 | 2.23766700  | 0.20042100  |
| C | -0.99873400 | 2.10070300  | -1.19729000 |
| C | -2.03737600 | 2.94386200  | 0.82396200  |
| C | -2.03345000 | 2.65217700  | -1.95656700 |
| H | -0.18331500 | 1.57303200  | -1.69513800 |
| C | -3.07487000 | 3.48528400  | 0.06687100  |
| H | -2.00894500 | 3.05625800  | 1.90936400  |
| C | -3.07440600 | 3.34093200  | -1.32635800 |
| H | -2.02714100 | 2.54536300  | -3.04410400 |
| H | -3.88656500 | 4.02541700  | 0.56076300  |
| O | 0.27202700  | 2.16087400  | 2.19844300  |
| C | -0.13007600 | -1.28218800 | -0.44145900 |
| C | 3.21290600  | -0.03828600 | 0.03295700  |
| N | 2.26381400  | -0.89638500 | -0.45644600 |
| H | -1.93247500 | -2.96530100 | 0.19659000  |
| H | -0.05782500 | -2.00961900 | -1.25754400 |
| H | -1.06123200 | -1.29141000 | 1.16600400  |
| O | -0.09369400 | -2.52583200 | 1.39820700  |
| H | 0.39827000  | -3.04498400 | 2.05368900  |
| H | -3.88545000 | 3.76864200  | -1.92150100 |
| H | 8.49567800  | -0.88501400 | -0.52454100 |
| N | -1.32799000 | -1.09969700 | 0.11821300  |
| N | -2.24175100 | -2.10380600 | -0.26553800 |
| C | -3.60669700 | -1.81987900 | -0.11981000 |
| C | -4.11038000 | -0.50903600 | -0.18239700 |
| C | -4.50665200 | -2.89176900 | 0.03529400  |
| C | -5.48622600 | -0.28634700 | -0.09195000 |
| H | -3.42073000 | 0.32700500  | -0.29857900 |
| C | -5.87827000 | -2.65491300 | 0.11707100  |
| H | -4.12025900 | -3.91366300 | 0.08872000  |
| C | -6.38095000 | -1.35041400 | 0.05528700  |
| H | -5.86039100 | 0.74007500  | -0.13812800 |
| H | -6.56091100 | -3.50052100 | 0.23769400  |
| H | -7.45570000 | -1.16699700 | 0.12413500  |

**TS2-1 (assisted by EtOH)**

E=-1397,57051773

|   |            |             |             |
|---|------------|-------------|-------------|
| C | 1.22209300 | -0.34834800 | -0.26970600 |
| C | 1.43890600 | 0.91171900  | 0.32238900  |
| C | 2.84210600 | 1.09283700  | 0.40213200  |
| H | 2.62248200 | -1.81393700 | -0.88581300 |
| H | 3.32960900 | 1.98003100  | 0.79793100  |
| C | 4.89056100 | -0.31988000 | -0.34947300 |

|   |             |             |             |
|---|-------------|-------------|-------------|
| C | 5.32305500  | -1.23868900 | -1.32653600 |
| C | 5.86537000  | 0.31603400  | 0.44525900  |
| C | 6.67993500  | -1.52019400 | -1.49453300 |
| H | 4.59652700  | -1.72034800 | -1.98671100 |
| C | 7.22058100  | 0.03966900  | 0.26899300  |
| H | 5.55213600  | 1.01937800  | 1.21962500  |
| C | 7.63548800  | -0.88224700 | -0.69852400 |
| H | 6.99261900  | -2.23385600 | -2.26097800 |
| H | 7.95947100  | 0.54184600  | 0.89851600  |
| C | 0.51100700  | 1.94755900  | 0.88156500  |
| C | -0.67038000 | 2.42826900  | 0.09177300  |
| C | -0.76443500 | 2.26789400  | -1.29920100 |
| C | -1.65968500 | 3.16474700  | 0.76652400  |
| C | -1.82887400 | 2.83627600  | -2.00460500 |
| H | 0.00667600  | 1.71134500  | -1.83500200 |
| C | -2.73264200 | 3.71292800  | 0.06610500  |
| H | -1.55835400 | 3.29853700  | 1.84516100  |
| C | -2.81627600 | 3.55430500  | -1.32321000 |
| H | -1.88724500 | 2.71852900  | -3.08957800 |
| H | -3.50383000 | 4.27439700  | 0.59962300  |
| O | 0.79825000  | 2.47434300  | 1.94150700  |
| C | 0.08576200  | -1.21406600 | -0.49925700 |
| C | 3.46911100  | -0.02000100 | -0.15405900 |
| N | 2.47022300  | -0.87038600 | -0.55041400 |
| H | -1.83708400 | -2.72282000 | -0.00890500 |
| H | 0.28230500  | -2.10507400 | -1.10447000 |
| H | -1.32895700 | -0.41147300 | 0.73913800  |
| O | 0.15254700  | -2.36963800 | 1.25294000  |
| H | -0.39556200 | -1.47346500 | 1.83298300  |
| H | 1.03927700  | -2.45948400 | 1.62829800  |
| O | -1.05926400 | -0.42506500 | 2.01592800  |
| C | -2.02689900 | -0.33189100 | 3.03433300  |
| H | -1.51825900 | -0.10126900 | 3.99094700  |
| H | -2.69047200 | 0.52837800  | 2.82347500  |
| C | -2.86205100 | -1.60049500 | 3.19403900  |
| H | -2.21501800 | -2.46958800 | 3.39880600  |
| H | -3.57362100 | -1.50002600 | 4.03054900  |
| H | -3.44295300 | -1.81493500 | 2.28213100  |
| H | -3.65081400 | 3.99493400  | -1.87511800 |
| H | 8.69779000  | -1.10012000 | -0.83233600 |
| N | -1.17699400 | -0.86000000 | -0.36346400 |
| N | -2.04739700 | -1.92806300 | -0.61443900 |
| C | -3.40275700 | -1.65950100 | -0.81239000 |
| C | -3.85845800 | -0.39962500 | -1.24021300 |
| C | -4.33780300 | -2.69748000 | -0.62417500 |
| C | -5.22037700 | -0.19426200 | -1.47219900 |
| H | -3.14424900 | 0.41049500  | -1.38627800 |
| C | -5.69280900 | -2.47802900 | -0.86690800 |
| H | -3.99151300 | -3.67948600 | -0.28891500 |
| C | -6.14782900 | -1.22451700 | -1.29213900 |
| H | -5.55754400 | 0.79287500  | -1.80029300 |
| H | -6.40192900 | -3.29645600 | -0.71582200 |
| H | -7.21078400 | -1.05448100 | -1.47764700 |



**TS2'-1 (non-assisted)**

E=-1242,39338382

|   |             |             |             |
|---|-------------|-------------|-------------|
| C | -0.92758300 | -1.67021300 | 0.03959400  |
| C | -0.64124100 | -0.29193800 | 0.18239900  |
| C | -1.89003700 | 0.38552900  | 0.14309300  |
| H | -2.71360900 | -2.69488300 | -0.21312400 |
| H | -2.03155300 | 1.45706000  | 0.25306900  |
| C | -4.35670200 | -0.40323800 | -0.07595500 |
| C | -5.22877800 | -1.48610900 | 0.15074400  |
| C | -4.91759600 | 0.85374800  | -0.37650800 |
| C | -6.61211500 | -1.31880500 | 0.07344300  |
| H | -4.82946200 | -2.46899500 | 0.41333500  |
| C | -6.30022900 | 1.01948500  | -0.44725900 |
| H | -4.26191800 | 1.70464200  | -0.57210400 |
| C | -7.15485700 | -0.06570100 | -0.22505300 |
| H | -7.26972500 | -2.17228700 | 0.25605800  |
| H | -6.71424400 | 2.00260800  | -0.68478100 |
| C | 0.65347900  | 0.35785100  | 0.32109400  |
| C | 0.76077900  | 1.81208000  | 0.00169500  |
| C | 0.64542500  | 2.23749400  | -1.33130100 |
| C | 0.96855700  | 2.75810000  | 1.01849900  |
| C | 0.76019500  | 3.59417400  | -1.64557200 |
| H | 0.47581100  | 1.50511600  | -2.12412100 |
| C | 1.07061900  | 4.11333800  | 0.69730700  |
| H | 1.03159800  | 2.38830700  | 2.04392200  |
| C | 0.97198000  | 4.53419600  | -0.63289400 |
| H | 0.68040300  | 3.91662000  | -2.68677400 |
| H | 1.22613700  | 4.84614300  | 1.49334300  |
| O | 0.83275300  | 0.06996800  | 2.50107500  |
| C | -0.13936600 | -2.89607700 | -0.06921000 |
| O | -0.67647200 | -3.98207300 | -0.21780800 |
| H | 0.96341600  | -2.78656600 | -0.01675200 |
| C | -2.90108300 | -0.56615000 | -0.00022800 |
| N | -2.28584100 | -1.78676200 | -0.05725800 |
| N | 1.74824700  | -0.41933500 | 0.45968200  |
| H | 3.07975400  | 0.74203300  | 1.40425200  |
| H | 0.28189500  | 0.02264900  | 3.29806400  |
| N | 2.97713400  | 0.25280400  | 0.51603300  |
| C | 4.11219500  | -0.44995600 | 0.09935900  |
| C | 4.04688800  | -1.45569200 | -0.88239000 |
| C | 5.36821000  | -0.10142800 | 0.63315100  |
| C | 5.21322700  | -2.09377300 | -1.30983300 |
| H | 3.08003800  | -1.72618600 | -1.30835500 |
| C | 6.52570200  | -0.74003300 | 0.19028000  |
| H | 5.42913600  | 0.67686700  | 1.39946800  |
| C | 6.45971000  | -1.74367100 | -0.78266600 |
| H | 5.14261800  | -2.87533400 | -2.07133900 |
| H | 7.49044600  | -0.45416700 | 0.61812700  |
| H | 7.36771400  | -2.24621200 | -1.12342000 |
| H | 1.05514100  | 5.59561700  | -0.88026400 |
| H | -8.23805200 | 0.06523700  | -0.28344700 |

H 1.50314700 -0.82764900 1.45877100

**TS2'-1 (assisted by EtOH)**

E= -1397,55710332

|   |             |             |             |
|---|-------------|-------------|-------------|
| C | 1.08085400  | 1.35974400  | -0.65830000 |
| C | 0.85409700  | 0.05754800  | -0.16143000 |
| C | 2.13558900  | -0.51580600 | 0.06701100  |
| H | 2.82274100  | 2.40518800  | -1.06431500 |
| H | 2.32197900  | -1.50717500 | 0.47100100  |
| C | 4.56900600  | 0.35509300  | -0.20868200 |
| C | 5.36331700  | 1.51845900  | -0.22354800 |
| C | 5.21619500  | -0.89385200 | -0.12933200 |
| C | 6.75527200  | 1.43489400  | -0.16708500 |
| H | 4.89391000  | 2.50491200  | -0.25648900 |
| C | 6.60684100  | -0.97413100 | -0.06650800 |
| H | 4.62284800  | -1.81052500 | -0.13388100 |
| C | 7.38405900  | 0.18901300  | -0.08738000 |
| H | 7.35135700  | 2.35078000  | -0.17686800 |
| H | 7.08858000  | -1.95339200 | -0.00836500 |
| C | -0.40680100 | -0.63127100 | 0.11642400  |
| C | -0.39112400 | -2.13386700 | 0.12923400  |
| C | -0.28170000 | -2.78305400 | -1.11240800 |
| C | -0.47612800 | -2.89680200 | 1.30219200  |
| C | -0.27192900 | -4.17781300 | -1.17902800 |
| H | -0.20834100 | -2.19349200 | -2.02953600 |
| C | -0.45801400 | -4.29284000 | 1.22830300  |
| H | -0.55549300 | -2.36559400 | 2.25123900  |
| C | -0.35874700 | -4.93682900 | -0.00792100 |
| H | -0.19368200 | -4.67211600 | -2.15063800 |
| H | -0.52406000 | -4.88040000 | 2.14774400  |
| O | -0.42097000 | -0.16320300 | 2.31578300  |
| C | 0.25207400  | 2.46140800  | -1.15580300 |
| O | 0.75833000  | 3.50264200  | -1.53558300 |
| H | -0.84232200 | 2.29764800  | -1.19644800 |
| C | 3.10551700  | 0.42925600  | -0.26936800 |
| N | 2.43351200  | 1.54096000  | -0.69837000 |
| N | -1.55489500 | 0.01529900  | -0.06326500 |
| H | -2.73557000 | -0.88601200 | 1.28406900  |
| O | -1.14330600 | 1.97912400  | 1.48701200  |
| H | -0.75133600 | 1.01156100  | 2.02259400  |
| C | -2.10490600 | 2.69487400  | 2.21938600  |
| H | -1.65754000 | 3.06265000  | 3.16625500  |
| H | -2.95888400 | 2.04750700  | 2.51890000  |
| C | -2.63104300 | 3.88377300  | 1.42540200  |
| H | -3.14097600 | 3.55039800  | 0.50626300  |
| H | -3.35193100 | 4.47044400  | 2.01871300  |
| H | -1.80098700 | 4.54616100  | 1.13160100  |
| H | 0.50097600  | -0.14185700 | 2.60733500  |
| N | -2.71745800 | -0.66080900 | 0.28986700  |
| C | -3.92373100 | -0.22292900 | -0.26363900 |
| C | -3.97299000 | 0.42446700  | -1.51153100 |
| C | -5.12697400 | -0.48041900 | 0.42108900  |

|   |             |             |             |
|---|-------------|-------------|-------------|
| C | -5.20299300 | 0.80717000  | -2.05164700 |
| H | -3.04726700 | 0.61569600  | -2.05623400 |
| C | -6.34769000 | -0.10154900 | -0.13517800 |
| H | -5.09710400 | -0.98069100 | 1.39324900  |
| C | -6.39745200 | 0.54788000  | -1.37389700 |
| H | -5.22340800 | 1.31187800  | -3.02128200 |
| H | -7.27109900 | -0.31024900 | 0.41155600  |
| H | -7.35551200 | 0.84835700  | -1.80371800 |
| H | -0.34744400 | -6.02855500 | -0.06022400 |
| H | 8.47380100  | 0.12431400  | -0.04100700 |
| H | -1.51739400 | 1.03141900  | 0.35503400  |

## INT2-1

E= -1166,00789672

|   |             |             |             |
|---|-------------|-------------|-------------|
| C | 0.01129300  | -0.38176700 | -0.14239000 |
| C | -1.37933500 | -0.62962700 | -0.18847700 |
| C | -2.01782400 | 0.64862900  | -0.17121100 |
| H | 1.09429900  | 1.39511700  | 0.00102500  |
| H | -3.08396500 | 0.83600400  | -0.25899600 |
| C | -1.14095800 | 3.08951100  | -0.10344700 |
| C | -0.04906500 | 3.91158600  | -0.44898300 |
| C | -2.35408400 | 3.71560900  | 0.25018100  |
| C | -0.16395100 | 5.30269000  | -0.43480900 |
| H | 0.89875800  | 3.46411100  | -0.75916700 |
| C | -2.46892000 | 5.10477800  | 0.25457500  |
| H | -3.21021200 | 3.10303300  | 0.54051700  |
| C | -1.37402100 | 5.90786400  | -0.08449800 |
| H | 0.69708500  | 5.91733200  | -0.70971900 |
| H | -3.41959200 | 5.56604500  | 0.53433500  |
| H | -1.46437100 | 6.99673900  | -0.07594300 |
| C | -1.97785800 | -1.97305000 | -0.30034100 |
| C | -3.44948600 | -2.16384200 | -0.03899700 |
| C | -4.16482500 | -1.42911600 | 0.92168500  |
| C | -4.10796700 | -3.19003600 | -0.73937700 |
| C | -5.51395100 | -1.70526700 | 1.16306300  |
| H | -3.65865500 | -0.65976600 | 1.50709800  |
| C | -5.45871000 | -3.45083900 | -0.51297000 |
| H | -3.53460900 | -3.77680600 | -1.45975900 |
| C | -6.16597800 | -2.70771400 | 0.43971600  |
| H | -6.05639300 | -1.13772000 | 1.92367400  |
| H | -5.96315900 | -4.24112500 | -1.07497700 |
| H | -7.22317500 | -2.91645000 | 0.62360700  |
| O | -1.30266300 | -2.94865200 | -0.61634000 |
| C | 1.13455900  | -1.28854700 | -0.12465500 |
| H | 0.90344300  | -2.35884800 | -0.21389900 |
| N | 2.33902100  | -0.82590200 | -0.02533100 |
| N | 3.35572900  | -1.68582900 | -0.02000000 |
| H | 3.16029100  | -2.68507200 | -0.09709900 |
| C | 4.68633500  | -1.28877800 | 0.08154400  |
| C | 5.05395000  | 0.06462200  | 0.19600400  |
| C | 5.69021600  | -2.27613800 | 0.06939400  |
| C | 6.40188600  | 0.40970900  | 0.29476000  |

|   |             |             |             |
|---|-------------|-------------|-------------|
| H | 4.27605300  | 0.82701900  | 0.20656400  |
| C | 7.03291800  | -1.91383500 | 0.16941000  |
| H | 5.41205800  | -3.33061100 | -0.01943800 |
| C | 7.40154500  | -0.56922400 | 0.28272400  |
| H | 6.67421300  | 1.46495900  | 0.38335400  |
| H | 7.79872700  | -2.69381800 | 0.15818100  |
| H | 8.45402200  | -0.28812800 | 0.36089500  |
| C | -1.03417800 | 1.62872500  | -0.11257300 |
| N | 0.17909800  | 0.97052500  | -0.09202600 |

### INT2'-1

E= -1166,00322868

|   |             |             |             |
|---|-------------|-------------|-------------|
| C | -0.84900800 | -1.62418800 | 0.35558200  |
| C | -0.57559100 | -0.25913400 | 0.11052900  |
| C | -1.83199700 | 0.35996100  | -0.12620700 |
| H | -2.62320100 | -2.71038600 | 0.37530300  |
| H | -1.99334000 | 1.41458000  | -0.33336600 |
| C | -4.28591900 | -0.49855600 | -0.19217000 |
| C | -5.15807400 | -1.50831800 | 0.26132800  |
| C | -4.84922900 | 0.63946100  | -0.80358800 |
| C | -6.53937300 | -1.38686200 | 0.10461900  |
| H | -4.75999900 | -2.39445100 | 0.76189500  |
| C | -6.23011000 | 0.76139600  | -0.95385700 |
| H | -4.19518300 | 1.42904200  | -1.17881100 |
| C | -7.08342300 | -0.25139700 | -0.50278700 |
| H | -7.19506000 | -2.18274900 | 0.46673900  |
| H | -6.64373600 | 1.65187000  | -1.43409200 |
| C | 0.72583900  | 0.41745200  | 0.08078900  |
| C | 0.75223200  | 1.91553700  | 0.17573900  |
| C | 1.23829800  | 2.69389200  | -0.89168500 |
| C | 0.29539200  | 2.57025400  | 1.33350500  |
| C | 1.26685700  | 4.08857300  | -0.80164900 |
| H | 1.58356500  | 2.20032900  | -1.80408600 |
| C | 0.32759800  | 3.96426500  | 1.42349500  |
| H | -0.08963400 | 1.97761500  | 2.16698200  |
| C | 0.81316000  | 4.72698600  | 0.35658700  |
| H | 1.63935500  | 4.67870400  | -1.64294300 |
| H | -0.02926700 | 4.45735100  | 2.33139700  |
| C | -0.04737200 | -2.78395000 | 0.71342400  |
| O | -0.54768300 | -3.88911800 | 0.87052100  |
| H | 1.04016900  | -2.60311000 | 0.84354200  |
| C | -2.83262500 | -0.61539500 | -0.03473500 |
| N | -2.20826400 | -1.79177300 | 0.25685200  |
| N | 1.80000700  | -0.30583500 | -0.02774200 |
| H | 3.09398100  | 1.25830600  | 0.18427600  |
| N | 3.00643900  | 0.25784500  | 0.00518700  |
| C | 4.17730700  | -0.48264000 | -0.15120700 |
| C | 4.15713000  | -1.85061000 | -0.47966700 |
| C | 5.41470500  | 0.16771900  | 0.01673800  |
| C | 5.35875500  | -2.54459300 | -0.62453700 |
| H | 3.19943300  | -2.34958100 | -0.62381600 |
| C | 6.60662900  | -0.53972900 | -0.13704100 |

|   |             |             |             |
|---|-------------|-------------|-------------|
| H | 5.43710600  | 1.23116400  | 0.27325500  |
| C | 6.59000500  | -1.90147900 | -0.45630700 |
| H | 5.32928600  | -3.60762000 | -0.87850900 |
| H | 7.55842500  | -0.01917600 | -0.00190000 |
| H | 7.52479100  | -2.45398800 | -0.57428500 |
| H | 0.83553700  | 5.81744200  | 0.42672200  |
| H | -8.16516900 | -0.15593100 | -0.62392200 |

**TS3-1 (non-assisted)**

E=-1165,95331551

|   |             |             |             |
|---|-------------|-------------|-------------|
| C | -0.94397600 | -1.60276300 | -0.56823300 |
| C | -0.58824100 | -0.22994800 | -0.65364700 |
| C | -1.75874800 | 0.52006100  | -0.30763100 |
| H | -2.78293800 | -2.49313400 | -0.02944400 |
| H | -1.84776700 | 1.60339400  | -0.32760200 |
| C | -4.22088200 | -0.13040100 | 0.15425900  |
| C | -5.20696500 | -1.07627900 | -0.19186100 |
| C | -4.63590900 | 1.06655400  | 0.77279800  |
| C | -6.55560800 | -0.83776400 | 0.07893100  |
| H | -4.92219100 | -1.99766700 | -0.70657800 |
| C | -5.98437700 | 1.30629300  | 1.03284000  |
| H | -3.88729200 | 1.80519000  | 1.06742100  |
| C | -6.95201500 | 0.35441700  | 0.69133500  |
| H | -7.30280000 | -1.58446200 | -0.20199800 |
| H | -6.28291500 | 2.24048000  | 1.51545400  |
| H | -8.00792900 | 0.54207500  | 0.90059200  |
| C | 0.68333400  | 0.28399600  | -1.10700500 |
| C | 1.21169000  | 1.53288500  | -0.54351900 |
| C | 0.96379000  | 1.89384000  | 0.79924400  |
| C | 2.01216000  | 2.38553800  | -1.33362200 |
| C | 1.48350300  | 3.07489400  | 1.32442200  |
| H | 0.37723600  | 1.22729100  | 1.43389100  |
| C | 2.52375300  | 3.57019600  | -0.80518800 |
| H | 2.20478500  | 2.10627800  | -2.36980700 |
| C | 2.26144700  | 3.92025000  | 0.52351800  |
| H | 1.29068800  | 3.33511400  | 2.36825400  |
| H | 3.13173800  | 4.22611800  | -1.43357600 |
| H | 2.66827600  | 4.84623900  | 0.93801600  |
| O | 1.11532100  | -0.00338700 | -2.36643200 |
| C | -0.08429900 | -2.71944600 | -0.37733900 |
| H | -0.52961300 | -3.70033600 | -0.17551100 |
| N | 1.21784100  | -2.64684900 | -0.20828600 |
| N | 1.87478300  | -1.56855100 | -0.55954700 |
| C | 3.11580000  | -1.39784500 | 0.08567100  |
| C | 4.05109800  | -0.52351400 | -0.50275200 |
| C | 3.45147100  | -2.04582800 | 1.29155900  |
| C | 5.28938900  | -0.30485600 | 0.09972800  |
| H | 3.79498100  | -0.03408300 | -1.44349600 |
| C | 4.69551000  | -1.82714000 | 1.88220800  |
| H | 2.72385400  | -2.72158500 | 1.74244700  |
| C | 5.61984200  | -0.95544900 | 1.29390700  |
| H | 6.00595600  | 0.37354000  | -0.37083800 |
| H | 4.94665300  | -2.33876000 | 2.81559700  |

|   |             |             |             |
|---|-------------|-------------|-------------|
| H | 6.59203200  | -0.78505300 | 1.76321200  |
| H | 1.52161600  | -0.89309000 | -2.27064300 |
| C | -2.80122400 | -0.37262500 | -0.11636500 |
| N | -2.29265100 | -1.64757800 | -0.29266400 |

**TS3-1 (assisted by EtOH)**

E= -1321,09275894

|   |             |             |             |
|---|-------------|-------------|-------------|
| C | 0.97302600  | 0.45649000  | 1.01778600  |
| C | 0.74077700  | -0.15868200 | -0.21937700 |
| C | 2.00308200  | -0.54093600 | -0.74827600 |
| H | 2.79597900  | 0.90326500  | 1.98928400  |
| H | 2.17026200  | -1.07085000 | -1.68333400 |
| C | 4.44664600  | -0.27480400 | 0.09297300  |
| C | 5.24296300  | -0.21531100 | 1.25558000  |
| C | 5.09633300  | -0.47300500 | -1.14329500 |
| C | 6.63141300  | -0.33840400 | 1.18332000  |
| H | 4.77397600  | -0.10011100 | 2.23660100  |
| C | 6.48231200  | -0.60603700 | -1.21114000 |
| H | 4.50577600  | -0.50449100 | -2.06134900 |
| C | 7.25980000  | -0.53566700 | -0.04954500 |
| H | 7.22517000  | -0.29140300 | 2.09986400  |
| H | 6.96198800  | -0.75642500 | -2.18175400 |
| H | 8.34642100  | -0.63521900 | -0.10547200 |
| C | -0.55526200 | -0.46746300 | -0.89427900 |
| C | -1.25242900 | -1.73109500 | -0.61569600 |
| C | -0.85143600 | -2.57509900 | 0.43989200  |
| C | -2.35633500 | -2.10279500 | -1.41122300 |
| C | -1.53514900 | -3.76366500 | 0.68857500  |
| H | -0.00113000 | -2.29150700 | 1.06203400  |
| C | -3.03762800 | -3.29055100 | -1.15532400 |
| H | -2.66134700 | -1.44501900 | -2.22492000 |
| C | -2.62884600 | -4.12397700 | -0.10757000 |
| H | -1.21660500 | -4.41287700 | 1.50777400  |
| H | -3.89448100 | -3.56927700 | -1.77345600 |
| H | -3.16538900 | -5.05541800 | 0.09116800  |
| O | -0.86159200 | 0.16391800  | -1.96497700 |
| C | 0.05287600  | 0.93504300  | 2.02621900  |
| H | 0.44155700  | 1.10143200  | 3.03864400  |
| N | -1.21796000 | 1.13009000  | 1.86334800  |
| N | -1.71446000 | 1.03875200  | 0.61191200  |
| C | -3.10358300 | 0.86169500  | 0.54815400  |
| C | -3.77323200 | 1.13280900  | -0.66658800 |
| C | -3.86174400 | 0.38369500  | 1.63977700  |
| C | -5.14977100 | 0.93157000  | -0.77773600 |
| H | -3.20832200 | 1.52509100  | -1.51301700 |
| C | -5.23774400 | 0.19725800  | 1.51771300  |
| H | -3.34863300 | 0.17454200  | 2.57852200  |
| C | -5.89446000 | 0.46483600  | 0.31039000  |
| H | -5.64768300 | 1.15521400  | -1.72558700 |
| H | -5.80681000 | -0.16733200 | 2.37799700  |
| H | -6.97317000 | 0.31433500  | 0.22058400  |
| H | -1.17589500 | 1.97015000  | -0.36850700 |
| H | -0.66225900 | 1.30757700  | -1.82053700 |

|   |             |             |             |
|---|-------------|-------------|-------------|
| O | -0.80344900 | 2.43256900  | -1.29884000 |
| C | 0.28939100  | 3.33566800  | -1.15230800 |
| H | 1.13319300  | 2.83833200  | -0.63960300 |
| H | 0.63268000  | 3.59915400  | -2.16687200 |
| C | -0.13673500 | 4.58373900  | -0.39630500 |
| H | 0.70109400  | 5.29617400  | -0.32591700 |
| H | -0.97509500 | 5.08080700  | -0.90837900 |
| H | -0.45994900 | 4.33436600  | 0.62715400  |
| C | 2.99000600  | -0.14515200 | 0.15441000  |
| N | 2.33576000  | 0.44353400  | 1.21372000  |

### INT3-1

E= -1165,99272983

|   |             |             |             |
|---|-------------|-------------|-------------|
| C | 0.54749900  | -0.43653400 | 0.28950900  |
| C | 0.90504600  | -1.68885500 | -0.19208900 |
| C | -0.08684500 | -2.66905600 | -0.50581000 |
| C | -0.87595100 | -0.11299200 | 0.65257700  |
| C | 1.73791600  | 0.32274700  | 0.43075300  |
| C | 2.80032400  | -0.48889300 | 0.03434800  |
| H | 0.15505000  | -3.66824600 | -0.88009700 |
| H | 1.82108200  | 1.33817900  | 0.81033300  |
| H | 2.79584400  | -2.46364100 | -0.76101100 |
| C | 4.23911100  | -0.21629200 | -0.00519900 |
| C | 5.18897000  | -1.25769600 | 0.03122400  |
| C | 4.71348800  | 1.10983500  | -0.07629400 |
| C | 6.55728300  | -0.98458100 | -0.01243800 |
| H | 4.85946500  | -2.29606200 | 0.12463000  |
| C | 6.08075600  | 1.38023200  | -0.10876000 |
| H | 3.99790900  | 1.93322500  | -0.12612600 |
| C | 7.01152300  | 0.33541500  | -0.08124600 |
| H | 7.27343800  | -1.80977600 | 0.01992000  |
| H | 6.42373300  | 2.41648100  | -0.16678200 |
| H | 8.08259000  | 0.54935400  | -0.11217900 |
| N | 2.26944000  | -1.71414700 | -0.33135100 |
| N | -1.34503600 | -2.38741400 | -0.36928400 |
| N | -1.75413900 | -1.18047200 | 0.07413400  |
| C | -3.17690500 | -1.02427900 | 0.07407900  |
| C | -3.93316500 | -1.66091400 | -0.92635400 |
| C | -3.84114200 | -0.25682400 | 1.04528500  |
| C | -5.32057800 | -1.52486900 | -0.95659500 |
| H | -3.41717200 | -2.26632200 | -1.67097700 |
| C | -5.23091600 | -0.11688000 | 0.99571200  |
| H | -3.27409400 | 0.20776800  | 1.84837500  |
| C | -5.98066000 | -0.74679000 | 0.00022900  |
| H | -5.89007500 | -2.02706400 | -1.74335400 |
| H | -5.73044600 | 0.48444600  | 1.76001700  |
| H | -7.06753400 | -0.63723100 | -0.02836200 |
| C | -1.26244500 | 1.27264600  | 0.11374300  |
| C | -1.30491600 | 2.39141100  | 0.95528700  |
| C | -1.49226700 | 1.44361500  | -1.25893300 |
| C | -1.58257000 | 3.65905700  | 0.43189400  |
| H | -1.12474200 | 2.26051700  | 2.02229200  |
| C | -1.77249500 | 2.70760700  | -1.77978300 |

|   |             |             |             |
|---|-------------|-------------|-------------|
| H | -1.45680400 | 0.57732500  | -1.92329900 |
| C | -1.81874800 | 3.82181000  | -0.93488100 |
| H | -1.61685700 | 4.52331800  | 1.10062800  |
| H | -1.95678900 | 2.82338600  | -2.85096300 |
| H | -2.03888400 | 4.81205400  | -1.34208400 |
| O | -1.01147900 | -0.06309200 | 2.07168900  |
| H | -0.54963100 | -0.83226200 | 2.43347700  |

#### INT4-1

E= -1321,57671196

|   |             |             |             |
|---|-------------|-------------|-------------|
| C | 0.38100100  | 0.17140700  | -0.06013100 |
| C | -1.01926100 | 0.51758800  | -0.05688800 |
| C | -1.07917200 | 1.96314000  | -0.07937300 |
| H | 2.07179600  | 1.37198700  | -0.03697500 |
| H | -1.97966600 | 2.56455000  | -0.15303200 |
| C | 0.72320300  | 3.81698900  | -0.14711100 |
| C | 2.01033800  | 4.09486100  | -0.64690900 |
| C | -0.07317900 | 4.89054700  | 0.29728400  |
| C | 2.48652600  | 5.40587500  | -0.69756900 |
| H | 2.64209700  | 3.28944900  | -1.03103000 |
| C | 0.40310900  | 6.19929200  | 0.23944600  |
| H | -1.06525200 | 4.69481100  | 0.70986100  |
| C | 1.68524700  | 6.46227600  | -0.25562300 |
| H | 3.48531100  | 5.60357100  | -1.09351500 |
| H | -0.22608500 | 7.01986700  | 0.59197600  |
| H | 2.05828700  | 7.48817400  | -0.29627500 |
| C | -2.10003200 | -0.38039100 | -0.06916900 |
| C | -3.50255500 | 0.05229500  | 0.09217500  |
| C | -3.86835000 | 0.98560000  | 1.08337000  |
| C | -4.49958400 | -0.48777000 | -0.74780400 |
| C | -5.20189600 | 1.36794700  | 1.22866400  |
| H | -3.11024800 | 1.38499900  | 1.75911000  |
| C | -5.82694500 | -0.08329200 | -0.60993100 |
| H | -4.22950600 | -1.20649600 | -1.52354900 |
| C | -6.18092600 | 0.84204200  | 0.37871000  |
| H | -5.47950000 | 2.07826400  | 2.01066000  |
| H | -6.58872900 | -0.48583500 | -1.28152400 |
| H | -7.22260800 | 1.15319600  | 0.48730000  |
| O | -1.85535600 | -1.65253700 | -0.26541300 |
| C | 1.05212200  | -1.09493100 | -0.01632600 |
| H | 0.44876200  | -2.00979400 | -0.02804000 |
| N | 2.35638800  | -1.10883800 | 0.02984600  |
| N | 2.99720400  | -2.24569200 | 0.06440200  |
| H | 2.46821200  | -3.12220600 | 0.05033800  |
| C | 4.39794000  | -2.35047400 | 0.11928300  |
| C | 5.22473800  | -1.21697200 | 0.16116600  |
| C | 4.96166700  | -3.63678400 | 0.13289600  |
| C | 6.60826100  | -1.38294300 | 0.21495600  |
| H | 4.78001500  | -0.22252800 | 0.15291300  |
| C | 6.34727900  | -3.78610000 | 0.18751800  |
| H | 4.31566700  | -4.51912900 | 0.10001200  |
| C | 7.17739600  | -2.66167700 | 0.22846700  |
| H | 7.25093700  | -0.49997200 | 0.24795400  |



|   |             |             |             |
|---|-------------|-------------|-------------|
| H | 6.77945000  | -4.78924800 | 0.19768900  |
| H | 8.26199000  | -2.78037200 | 0.27124600  |
| C | 0.20737300  | 2.44553600  | -0.09409400 |
| N | 1.05809000  | 1.33881100  | -0.07840600 |
| H | -2.64239300 | -2.27092000 | -0.11188600 |
| O | -3.72511500 | -3.40467300 | 0.08008600  |
| C | -3.47161900 | -4.81656600 | -0.04750400 |
| H | -2.62780600 | -4.89413600 | -0.74946900 |
| H | -3.13570800 | -5.22293000 | 0.92322000  |
| C | -4.68254800 | -5.56732000 | -0.56840500 |
| H | -4.44372500 | -6.63547500 | -0.68936100 |
| H | -5.53102200 | -5.49830200 | 0.13305100  |
| H | -5.00347600 | -5.17223500 | -1.54428000 |
| H | -4.47561000 | -3.25264400 | 0.67275400  |

**TS5-1 (not assisted)**

E=-1166,36790832

|   |             |             |             |
|---|-------------|-------------|-------------|
| C | -0.98050800 | -1.69327300 | -0.28881700 |
| C | -0.59227200 | -0.37098700 | -0.52043800 |
| C | -1.74485100 | 0.44696300  | -0.40706900 |
| H | -2.89492100 | -2.50763700 | 0.12025100  |
| H | -1.79360900 | 1.52891800  | -0.49731900 |
| C | -4.23809100 | -0.08866700 | 0.08862300  |
| C | -5.06716900 | -0.93761100 | 0.84798900  |
| C | -4.79410800 | 1.08115700  | -0.46472400 |
| C | -6.41433200 | -0.62964200 | 1.03955200  |
| H | -4.65866200 | -1.83283000 | 1.32520000  |
| C | -6.13961800 | 1.38848300  | -0.26632700 |
| H | -4.17420800 | 1.74393400  | -1.07229400 |
| C | -6.95472200 | 0.53377900  | 0.48335200  |
| H | -7.04231300 | -1.29569000 | 1.63552600  |
| H | -6.55738900 | 2.29675900  | -0.70647900 |
| H | -8.00916300 | 0.77505800  | 0.63544600  |
| C | 0.81304400  | -0.05832600 | -0.81597700 |
| C | 1.34223400  | 1.25055400  | -0.30448200 |
| C | 1.15314300  | 1.54552100  | 1.05774600  |
| C | 2.00305700  | 2.17576100  | -1.12663000 |
| C | 1.62572700  | 2.74570700  | 1.58769100  |
| H | 0.63378900  | 0.83633200  | 1.70590600  |
| C | 2.46611200  | 3.38040400  | -0.59056100 |
| H | 2.14710400  | 1.96512800  | -2.18605600 |
| C | 2.28246800  | 3.66647100  | 0.76415800  |
| H | 1.47582600  | 2.96528400  | 2.64706400  |
| H | 2.97178600  | 4.09871400  | -1.23963600 |
| H | 2.64717100  | 4.60880100  | 1.17935800  |
| O | 1.06418700  | -0.13171200 | -2.36317000 |
| C | -0.03641000 | -2.76120000 | -0.17990200 |
| H | -0.34900500 | -3.78634800 | 0.04790100  |
| N | 1.23837000  | -2.58294800 | -0.28956700 |
| N | 1.73598400  | -1.31762300 | -0.62759600 |
| C | 3.05629900  | -1.10743800 | -0.03461300 |
| C | 4.10605200  | -0.66893000 | -0.84456000 |
| C | 3.25794100  | -1.36969700 | 1.32317100  |

|   |             |             |             |
|---|-------------|-------------|-------------|
| C | 5.37119800  | -0.47568500 | -0.28330500 |
| H | 3.94890700  | -0.49060100 | -1.91092000 |
| C | 4.52562100  | -1.17764800 | 1.87517200  |
| H | 2.43487400  | -1.73723900 | 1.93832900  |
| C | 5.58134600  | -0.72811800 | 1.07496100  |
| H | 6.19615300  | -0.13883700 | -0.91471800 |
| H | 4.69035000  | -1.38592000 | 2.93461800  |
| H | 6.57277800  | -0.58330800 | 1.50984700  |
| H | 1.66007500  | -1.06334000 | -1.99594100 |
| H | 0.23414500  | -0.32897000 | -2.84120400 |
| C | -2.81983500 | -0.39943000 | -0.12093400 |
| N | -2.32594500 | -1.68562700 | -0.05054900 |

**TS5-1 (assisted by EtOH)**

E= -1321,53566042

|   |             |             |             |
|---|-------------|-------------|-------------|
| C | -1.07116500 | -1.46483700 | 0.42893300  |
| C | -0.80877900 | -0.27837400 | -0.24873300 |
| C | -2.04292800 | 0.37847200  | -0.46332800 |
| H | -2.91455900 | -2.30604700 | 1.07655700  |
| H | -2.20321300 | 1.34295000  | -0.93833700 |
| C | -4.49288800 | -0.22407200 | 0.16472400  |
| C | -5.27441700 | -0.84696700 | 1.15786700  |
| C | -5.13408900 | 0.61765600  | -0.76528000 |
| C | -6.65359300 | -0.64242700 | 1.21213000  |
| H | -4.80480700 | -1.47457400 | 1.92040000  |
| C | -6.51160400 | 0.82515400  | -0.70436700 |
| H | -4.55166300 | 1.09769800  | -1.55452300 |
| C | -7.27732000 | 0.19417700  | 0.28176200  |
| H | -7.24241800 | -1.12986300 | 1.99260700  |
| H | -6.99270600 | 1.47779600  | -1.43656100 |
| H | -8.35672100 | 0.35590800  | 0.32634100  |
| C | 0.59205000  | 0.00044300  | -0.69344100 |
| C | 0.89234200  | 1.48914500  | -0.83132100 |
| C | 0.54415700  | 2.36415500  | 0.21110700  |
| C | 1.49471900  | 2.00993900  | -1.98471800 |
| C | 0.80415500  | 3.73059400  | 0.10341200  |
| H | 0.07034200  | 1.97635000  | 1.11495600  |
| C | 1.74958400  | 3.38102000  | -2.09308600 |
| H | 1.76454600  | 1.34525600  | -2.80591800 |
| C | 1.40787200  | 4.24359800  | -1.04979500 |
| H | 0.53075400  | 4.39913800  | 0.92298000  |
| H | 2.21610000  | 3.77349800  | -2.99968900 |
| H | 1.60680300  | 5.31446700  | -1.13483100 |
| O | 0.78021200  | -0.66926300 | -2.00195700 |
| C | -0.01367400 | -2.31242500 | 0.87289500  |
| H | -0.20095100 | -3.28409600 | 1.34363100  |
| N | 1.23179800  | -1.95810200 | 0.79776900  |
| N | 1.57242400  | -0.73097600 | 0.19291900  |
| C | 2.54295600  | -0.00362500 | 0.99517300  |
| C | 3.64115300  | 0.61009500  | 0.37854900  |
| C | 2.40550600  | 0.04343800  | 2.38783600  |
| C | 4.58328300  | 1.29011900  | 1.15352000  |
| H | 3.76054300  | 0.56684700  | -0.70539800 |

|   |             |             |             |
|---|-------------|-------------|-------------|
| C | 3.35778600  | 0.71538500  | 3.15755200  |
| H | 1.55927800  | -0.45126600 | 2.86633500  |
| C | 4.44503800  | 1.34411800  | 2.54354000  |
| H | 5.43430500  | 1.77176500  | 0.66668600  |
| H | 3.24709700  | 0.74800300  | 4.24390400  |
| H | 5.18697300  | 1.87082600  | 3.14787400  |
| H | 2.63594500  | -1.64316400 | -0.81958900 |
| H | 2.01805300  | -1.60150000 | -2.19396300 |
| O | 2.84295000  | -2.01386600 | -1.74874000 |
| C | 2.90549000  | -3.49426900 | -1.78881200 |
| H | 1.89969100  | -3.87263100 | -1.55658100 |
| H | 3.16118600  | -3.73079400 | -2.83023900 |
| C | 3.94610300  | -3.97378600 | -0.80762500 |
| H | 4.01206900  | -5.07083500 | -0.86740800 |
| H | 4.93759900  | -3.55824300 | -1.04062500 |
| H | 3.66708100  | -3.70504400 | 0.22292000  |
| H | -0.00948000 | -0.53188700 | -2.54716500 |
| C | -3.04212300 | -0.43036700 | 0.09464900  |
| N | -2.42634400 | -1.54144900 | 0.62536000  |

**Product 4a**

E= -1089,98846799

|   |             |             |             |
|---|-------------|-------------|-------------|
| C | 0.52499400  | -0.38568500 | -0.05142800 |
| C | 0.94312900  | -1.74570900 | -0.10337000 |
| C | -0.01724800 | -2.76642500 | -0.10972700 |
| C | -0.86009200 | -0.11792800 | -0.00651700 |
| C | 1.70234400  | 0.41235600  | -0.00148900 |
| C | 2.78757500  | -0.45604500 | -0.03835300 |
| H | 0.23033000  | -3.83152900 | -0.12877900 |
| H | 1.75654700  | 1.49293500  | 0.08776600  |
| H | 2.88070000  | -2.58503300 | -0.17403300 |
| C | 4.22375900  | -0.17259300 | -0.01181100 |
| C | 5.15051500  | -1.13573700 | 0.43524500  |
| C | 4.70026100  | 1.08597200  | -0.42974500 |
| C | 6.51517000  | -0.84903100 | 0.45752500  |
| H | 4.81156200  | -2.10793800 | 0.80342000  |
| C | 6.06463700  | 1.36876900  | -0.40389400 |
| H | 4.00040000  | 1.83844400  | -0.79874600 |
| C | 6.97572200  | 0.40280100  | 0.03759300  |
| H | 7.22123400  | -1.60245800 | 0.81344700  |
| H | 6.42126900  | 2.34579800  | -0.73731500 |
| H | 8.04483300  | 0.62623600  | 0.05544300  |
| N | 2.29903100  | -1.75762500 | -0.09638000 |
| N | -1.30073900 | -2.47914500 | -0.09582400 |
| N | -1.69237600 | -1.19724700 | -0.06286600 |
| C | -3.14329000 | -1.06519600 | -0.13285800 |
| C | -3.92038400 | -1.70198700 | 0.83746100  |
| C | -3.72469600 | -0.36828500 | -1.19408500 |
| C | -5.31126900 | -1.61362300 | 0.75402900  |
| H | -3.44083300 | -2.26457000 | 1.64022800  |
| C | -5.11727400 | -0.29095300 | -1.26784700 |
| H | -3.10298700 | 0.10125000  | -1.95787700 |

|   |             |             |             |
|---|-------------|-------------|-------------|
| C | -5.90983000 | -0.90719700 | -0.29454100 |
| H | -5.92874900 | -2.10382800 | 1.50977100  |
| H | -5.58289100 | 0.24681700  | -2.09649500 |
| H | -6.99838600 | -0.84415800 | -0.35803900 |
| C | -1.37748100 | 1.26172300  | 0.13872500  |
| C | -2.23372100 | 1.61012300  | 1.19994800  |
| C | -0.95176600 | 2.25581200  | -0.76241600 |
| C | -2.65557200 | 2.93051000  | 1.35140900  |
| H | -2.55922800 | 0.85278600  | 1.91514700  |
| C | -1.39433000 | 3.57159100  | -0.61496900 |
| H | -0.29447100 | 1.99368800  | -1.59468100 |
| C | -2.24320100 | 3.91135500  | 0.44279300  |
| H | -3.31038600 | 3.19543200  | 2.18444500  |
| H | -1.07487700 | 4.33373400  | -1.32925300 |
| H | -2.58318600 | 4.94278900  | 0.56097400  |

### Mechanism 2 (leading to product 6c)

#### Pyrrolo-2,3-dicarbonyl 2f

E=-1113,23007981

|   |             |             |             |
|---|-------------|-------------|-------------|
| C | -0.61622200 | 1.13817200  | -0.79588100 |
| C | -0.81980000 | -0.24484800 | -0.62623000 |
| C | 0.44213100  | -0.81463300 | -0.34175400 |
| H | 1.17746700  | 2.26761300  | -0.74408700 |
| H | 0.62350500  | -1.86833900 | -0.14477400 |
| C | 2.83420600  | 0.16168000  | -0.04451700 |
| C | 3.54224900  | 1.29067600  | 0.42181600  |
| C | 3.56013500  | -1.02533500 | -0.24074500 |
| C | 4.90766000  | 1.23646200  | 0.66764000  |
| H | 3.01277000  | 2.22553800  | 0.62520100  |
| C | 4.93139400  | -1.09593400 | 0.00997700  |
| H | 3.04735800  | -1.91336400 | -0.61644500 |
| C | 5.62033400  | 0.04053100  | 0.46482800  |
| H | 5.45244600  | 2.10855700  | 1.03428900  |
| H | 5.45316100  | -2.03731000 | -0.16201300 |
| C | -2.05320000 | -1.08206600 | -0.78746400 |
| C | -3.33945200 | -0.69560000 | -0.13020200 |
| C | -3.42247400 | 0.26688500  | 0.88901400  |
| C | -4.50340800 | -1.38794300 | -0.51027400 |
| C | -4.63839800 | 0.54162400  | 1.51343300  |
| H | -2.52582900 | 0.79986300  | 1.20877600  |
| C | -5.72727300 | -1.11444600 | 0.09320200  |
| H | -4.42186100 | -2.14564700 | -1.29162300 |
| C | -5.77592700 | -0.14971800 | 1.10046700  |
| H | -4.72179900 | 1.28262500  | 2.31053200  |
| H | -6.64317100 | -1.63302800 | -0.19671600 |
| O | -1.96399100 | -2.12284100 | -1.41830600 |
| C | -1.48306300 | 2.22376700  | -1.23061300 |
| H | -0.95345800 | 3.21572200  | -1.29110800 |
| O | -2.65803200 | 2.13158800  | -1.51753200 |
| C | 1.39472400  | 0.20903000  | -0.31326700 |
| N | 0.73008000  | 1.37117600  | -0.59092200 |
| F | -6.94797800 | 0.11522000  | 1.69087700  |

|   |            |             |             |
|---|------------|-------------|-------------|
| O | 6.94588500 | 0.08153400  | 0.73323500  |
| C | 7.72570200 | -1.08300500 | 0.56518100  |
| H | 7.72001900 | -1.43295600 | -0.48264400 |
| H | 8.75282300 | -0.81353200 | 0.84451800  |
| H | 7.38101200 | -1.90500500 | 1.21779900  |

**Glycine methylester**

E=-323,893424611

|   |             |             |             |
|---|-------------|-------------|-------------|
| C | 0.03018200  | 0.09706100  | 0.04521900  |
| O | 0.08412900  | 1.30179600  | 0.08926500  |
| C | -1.24986700 | -0.70984200 | 0.14435300  |
| H | -1.14478400 | -1.60748800 | -0.48787000 |
| H | -1.27431300 | -1.08399800 | 1.19448200  |
| N | -2.38150300 | 0.09632800  | -0.26264800 |
| H | -3.25279100 | -0.29311500 | 0.09120600  |
| H | -2.28059100 | 1.03605300  | 0.12252400  |
| O | 1.11005800  | -0.69659400 | -0.04320000 |
| C | 2.37843500  | -0.04043300 | -0.06329500 |
| H | 2.52758300  | 0.55361200  | 0.85139800  |
| H | 3.13284500  | -0.83412300 | -0.12877000 |
| H | 2.45657700  | 0.63242900  | -0.93062400 |

**TS1-2 (non-assisted)**

E=-1437,0864739

|   |             |             |             |
|---|-------------|-------------|-------------|
| C | 0.21979000  | -0.87506600 | 0.81200000  |
| C | 0.34687100  | 0.44437200  | 0.34665200  |
| C | -0.97408500 | 0.86176300  | -0.02872100 |
| H | -1.35369400 | -2.13495800 | 1.09345200  |
| H | -1.24506900 | 1.80524200  | -0.49509800 |
| C | -3.29351900 | -0.31068400 | 0.00828800  |
| C | -3.94590100 | -1.55432300 | 0.03498200  |
| C | -4.08724800 | 0.83139200  | -0.23735500 |
| C | -5.32446800 | -1.66973000 | -0.16890100 |
| H | -3.37418300 | -2.47036800 | 0.20258300  |
| C | -5.45475600 | 0.73076600  | -0.44862000 |
| H | -3.62191800 | 1.81929900  | -0.24962100 |
| C | -6.09286900 | -0.52299600 | -0.41511600 |
| H | -5.78210000 | -2.65866000 | -0.13988900 |
| H | -6.06469800 | 1.61695700  | -0.63528000 |
| C | 1.64237400  | 1.12349700  | 0.23292300  |
| C | 1.71473000  | 2.61716600  | 0.09616900  |
| C | 0.74379100  | 3.48924100  | 0.61873900  |
| C | 2.85251900  | 3.16469500  | -0.52489600 |
| C | 0.89361500  | 4.87323600  | 0.51094400  |
| H | -0.12424200 | 3.08715500  | 1.14252100  |
| C | 3.00717800  | 4.54221300  | -0.65486900 |
| H | 3.61529100  | 2.48128200  | -0.90221800 |
| C | 2.02011000  | 5.37974800  | -0.13358800 |
| H | 0.15612400  | 5.56432000  | 0.92359000  |
| H | 3.87749100  | 4.98161400  | -1.14628200 |
| O | 2.69164300  | 0.47506800  | 0.24066400  |
| C | 1.14113600  | -1.90427800 | 1.41846700  |
| N | 2.11019600  | -2.50983900 | 0.36208500  |

|   |             |             |             |
|---|-------------|-------------|-------------|
| H | 1.42631000  | -3.42041900 | 0.76758200  |
| C | -1.84845700 | -0.19022900 | 0.22211000  |
| N | -1.08347600 | -1.21804000 | 0.73508700  |
| C | 3.54491300  | -2.47872400 | 0.63601800  |
| H | 3.76308700  | -3.02779600 | 1.56367600  |
| H | 3.87272600  | -1.43351000 | 0.75986700  |
| C | 4.31016400  | -3.07750800 | -0.52702400 |
| O | 3.85266200  | -3.22587600 | -1.63397000 |
| O | 5.56402000  | -3.37988100 | -0.17714900 |
| C | 6.41113000  | -3.88829700 | -1.21289000 |
| H | 6.50193000  | -3.16025200 | -2.03273700 |
| H | 7.38819600  | -4.06407500 | -0.74741700 |
| H | 6.00589300  | -4.82677400 | -1.61953500 |
| F | 2.16433700  | 6.70572800  | -0.24890600 |
| O | -7.43276400 | -0.52048400 | -0.62776100 |
| C | -8.13776100 | -1.74059100 | -0.60047900 |
| H | -9.19194300 | -1.49804400 | -0.79074600 |
| H | -7.78530000 | -2.43780900 | -1.38227200 |
| H | -8.05797100 | -2.24060000 | 0.38193800  |
| O | 0.50980100  | -3.05900700 | 1.74266500  |
| H | 1.78010200  | -1.43325000 | 2.19914300  |
| H | 1.92946300  | -2.19829200 | -0.59791000 |

**TS1-2 (assisted by EtOH)**

E=-1592,2515823

|   |             |             |             |
|---|-------------|-------------|-------------|
| C | -0.23299900 | -0.35439700 | -0.84501000 |
| C | -0.15281500 | 0.94908200  | -0.31600900 |
| C | 1.22982700  | 1.16398800  | 0.01023400  |
| H | 1.17124300  | -1.78503800 | -1.26000400 |
| H | 1.64413900  | 2.03578600  | 0.50932400  |
| C | 3.35900800  | -0.31145500 | -0.18533300 |
| C | 3.81787500  | -1.63839800 | -0.22202200 |
| C | 4.32274000  | 0.70374800  | 0.00069800  |
| C | 5.17316700  | -1.95407200 | -0.08562200 |
| H | 3.10856700  | -2.46168500 | -0.33807600 |
| C | 5.66955200  | 0.40413200  | 0.14592400  |
| H | 4.00798200  | 1.74947000  | 0.01715300  |
| C | 6.11346100  | -0.93070000 | 0.10217400  |
| H | 5.47816200  | -3.00005900 | -0.11766200 |
| H | 6.41229400  | 1.19195500  | 0.28660400  |
| C | -1.30004500 | 1.83514300  | -0.10297100 |
| C | -1.10257300 | 3.31124800  | 0.06266200  |
| C | -0.04613700 | 4.02079800  | -0.53575500 |
| C | -2.07177700 | 4.02478300  | 0.79300000  |
| C | 0.05252500  | 5.40611000  | -0.39649100 |
| H | 0.69101800  | 3.49272000  | -1.14177500 |
| C | -1.97553700 | 5.40398800  | 0.95479700  |
| H | -2.90386200 | 3.47097000  | 1.23121600  |
| C | -0.90966900 | 6.07696500  | 0.35577000  |
| H | 0.85770100  | 5.97424600  | -0.86612800 |
| H | -2.71059000 | 5.96967300  | 1.53059700  |
| O | -2.45447200 | 1.39089100  | -0.04537100 |
| C | -1.31492100 | -1.21502200 | -1.48649000 |

|   |             |             |             |
|---|-------------|-------------|-------------|
| N | -2.48135000 | -1.33457500 | -0.50824800 |
| H | -2.10773200 | -2.18644100 | 0.17353200  |
| C | 1.93825100  | 0.02020100  | -0.32760400 |
| N | 1.01632900  | -0.86660900 | -0.84884100 |
| C | -3.71156200 | -1.80797000 | -1.14828100 |
| H | -3.49592200 | -2.74201100 | -1.68629700 |
| H | -4.08059100 | -1.07504300 | -1.88591200 |
| C | -4.79266200 | -2.04483400 | -0.11034400 |
| O | -4.70559300 | -1.74596600 | 1.05326100  |
| O | -5.86662700 | -2.61208100 | -0.67333900 |
| C | -6.97360200 | -2.87735000 | 0.19333100  |
| H | -7.34311800 | -1.94641300 | 0.64889500  |
| H | -7.75012800 | -3.33030900 | -0.43460100 |
| H | -6.67930400 | -3.56865600 | 0.99696600  |
| F | -0.81407400 | 7.40345200  | 0.50098300  |
| O | 7.44747400  | -1.12396800 | 0.24804800  |
| C | 7.96364700  | -2.43548700 | 0.21139400  |
| H | 9.05015800  | -2.34840200 | 0.34579500  |
| H | 7.55249000  | -3.06243100 | 1.02326100  |
| H | 7.76173900  | -2.93038500 | -0.75588200 |
| O | -0.85624900 | -2.45272900 | -1.80417100 |
| H | -1.70929700 | -0.67925600 | -2.37659800 |
| H | -2.63112900 | -0.41280100 | -0.05333500 |
| H | -1.00276200 | -3.08081100 | -0.81969900 |
| O | -1.45077900 | -3.42024200 | 0.30360700  |
| C | -0.54337500 | -3.69133100 | 1.33601800  |
| H | 0.17157600  | -4.47811500 | 1.01457400  |
| H | 0.07796600  | -2.80189100 | 1.58905800  |
| C | -1.26641700 | -4.16607800 | 2.59185800  |
| H | -1.85898800 | -5.06799700 | 2.36933400  |
| H | -0.55537700 | -4.40422900 | 3.40089000  |
| H | -1.96023900 | -3.39142700 | 2.95770800  |

**TS1'-2 (non-assisted)**

E= -1437,07875287

|   |             |             |             |
|---|-------------|-------------|-------------|
| C | -0.15345200 | -2.04760700 | 0.64642900  |
| C | 0.29303000  | -0.73137600 | 0.91981900  |
| C | -0.83176400 | 0.10550400  | 0.78185000  |
| H | -2.10312600 | -2.75946000 | 0.17187900  |
| H | -0.83315200 | 1.18499700  | 0.90798700  |
| C | -3.32647900 | -0.27619300 | 0.16000800  |
| C | -4.18524700 | -1.05786500 | -0.63081000 |
| C | -3.84308500 | 0.92496600  | 0.69395600  |
| C | -5.50751700 | -0.67917400 | -0.87729900 |
| H | -3.81703600 | -1.97584200 | -1.09716100 |
| C | -5.15159700 | 1.31599300  | 0.45188200  |
| H | -3.20815100 | 1.54980600  | 1.32530800  |
| C | -6.00264000 | 0.51694200  | -0.33493300 |
| H | -6.13421900 | -1.31542400 | -1.50217700 |
| H | -5.55193700 | 2.24140400  | 0.87044000  |
| C | 1.62785800  | -0.18922600 | 1.43869100  |
| C | 1.98542300  | 1.14622700  | 0.75895600  |
| C | 1.87367200  | 1.36398500  | -0.62393600 |

|   |             |             |             |
|---|-------------|-------------|-------------|
| C | 2.43260900  | 2.19171600  | 1.57661400  |
| C | 2.21664100  | 2.59794300  | -1.18220100 |
| H | 1.51541700  | 0.56200500  | -1.27241600 |
| C | 2.77823500  | 3.43219000  | 1.03346300  |
| H | 2.48361500  | 1.99720800  | 2.64996500  |
| C | 2.66671200  | 3.61612700  | -0.34242700 |
| H | 2.13390700  | 2.78645200  | -2.25471900 |
| H | 3.12327800  | 4.25869600  | 1.65851100  |
| O | 1.67569500  | -0.16209900 | 2.79187100  |
| C | 0.45220100  | -3.35167800 | 0.61643300  |
| O | 1.61546500  | -3.65140600 | 0.87068400  |
| H | -0.26011400 | -4.16611500 | 0.32652100  |
| N | 2.82388800  | -1.22211000 | 1.27315500  |
| H | 2.45881800  | -2.18593500 | 1.11287400  |
| H | 2.73217800  | -0.95500600 | 2.44623800  |
| H | 4.84545700  | -1.60339200 | 0.89177100  |
| C | -1.94177600 | -0.67278600 | 0.42579500  |
| N | -1.50854300 | -1.95769400 | 0.34088700  |
| C | 4.02862100  | -0.97863200 | 0.49477100  |
| H | 4.35593500  | 0.06685900  | 0.59773100  |
| C | 3.87203300  | -1.29761100 | -0.98347700 |
| O | 2.84951800  | -1.64617500 | -1.51863900 |
| O | 5.04133700  | -1.14122900 | -1.62085100 |
| C | 5.04213400  | -1.40054000 | -3.02684200 |
| H | 4.72822100  | -2.43486800 | -3.23246000 |
| H | 6.07231100  | -1.23908300 | -3.36652600 |
| H | 4.35691800  | -0.71578700 | -3.54892400 |
| F | 2.99311100  | 4.80498100  | -0.87555800 |
| O | -7.26262300 | 0.97920500  | -0.51190700 |
| C | -8.17497500 | 0.23065500  | -1.28464300 |
| H | -7.83045000 | 0.11353700  | -2.32794700 |
| H | -9.11924800 | 0.79113500  | -1.28326800 |
| H | -8.35298300 | -0.77112000 | -0.85373700 |

**TS1'-2 (assisted by EtOH)**

E= -1592,2415655

|   |             |             |             |
|---|-------------|-------------|-------------|
| C | 0.42345500  | 0.38950800  | -1.54013800 |
| C | 0.07518700  | 0.26602800  | -0.17471900 |
| C | 1.27203000  | 0.05402800  | 0.53102400  |
| H | 2.34121100  | 0.37710600  | -2.46234600 |
| H | 1.33367600  | -0.08928700 | 1.60587600  |
| C | 3.77201100  | -0.14793700 | -0.15183100 |
| C | 4.63675400  | -0.58768000 | -1.16812600 |
| C | 4.33233000  | 0.10638700  | 1.11953200  |
| C | 6.00555500  | -0.75818600 | -0.94647100 |
| H | 4.24056300  | -0.83574500 | -2.15669000 |
| C | 5.68825000  | -0.06418000 | 1.35460600  |
| H | 3.69105500  | 0.46057200  | 1.92909800  |
| C | 6.54403000  | -0.49592500 | 0.32317000  |
| H | 6.63626600  | -1.10790700 | -1.76368100 |
| H | 6.12208400  | 0.13846500  | 2.33566600  |
| C | -1.27085500 | 0.25993400  | 0.57337300  |
| C | -1.89551300 | -1.14494700 | 0.53786500  |



|   |             |             |             |
|---|-------------|-------------|-------------|
| C | -2.28847300 | -1.76287700 | -0.66049300 |
| C | -2.04538000 | -1.84305000 | 1.74374000  |
| C | -2.82252700 | -3.05262900 | -0.65466300 |
| H | -2.20520700 | -1.23267700 | -1.61070400 |
| C | -2.57318400 | -3.13672400 | 1.76248000  |
| H | -1.73801900 | -1.34788800 | 2.66539400  |
| C | -2.95373900 | -3.72450400 | 0.55947100  |
| H | -3.14168700 | -3.54181800 | -1.57698100 |
| H | -2.69352300 | -3.69344300 | 2.69412700  |
| O | -1.11444100 | 0.69918200  | 1.84477700  |
| C | -0.31763800 | 0.65458000  | -2.74384400 |
| O | -1.52400000 | 0.86087300  | -2.83219200 |
| H | 0.30905400  | 0.66624200  | -3.67272200 |
| N | -2.20666700 | 1.29141800  | -0.13449800 |
| H | -2.25219500 | 1.14437000  | -1.16437500 |
| H | -1.66471500 | 2.23181600  | 0.15577600  |
| H | -3.75990900 | 2.47117000  | 0.65681900  |
| H | -0.94941500 | 1.84607700  | 1.72668000  |
| O | -1.03814400 | 3.01153200  | 1.21769700  |
| C | 0.09932600  | 3.81731600  | 1.14749200  |
| H | 0.56521800  | 3.91182500  | 2.15210200  |
| H | 0.88709900  | 3.37605800  | 0.49371600  |
| C | -0.24041900 | 5.21504900  | 0.63667700  |
| H | -0.65456900 | 5.16890300  | -0.38484200 |
| H | 0.64986900  | 5.86662000  | 0.61602800  |
| H | -1.00003100 | 5.68148700  | 1.28476500  |
| C | 2.33804200  | 0.03890300  | -0.38091800 |
| N | 1.80301500  | 0.23444500  | -1.61614900 |
| C | -3.53741000 | 1.40550800  | 0.48684900  |
| H | -3.51147000 | 0.94159600  | 1.48243200  |
| C | -4.64434200 | 0.81088300  | -0.35764200 |
| O | -4.52480400 | 0.43240200  | -1.49570400 |
| O | -5.79481100 | 0.79774400  | 0.32730000  |
| C | -6.94067500 | 0.29281800  | -0.36356500 |
| H | -7.14555300 | 0.88804200  | -1.26610000 |
| H | -7.77783000 | 0.36627800  | 0.34095000  |
| H | -6.78264000 | -0.75421500 | -0.66222700 |
| F | -3.46361200 | -4.96665000 | 0.56723200  |
| O | 7.85050300  | -0.62969800 | 0.64741900  |
| C | 8.77088600  | -1.05626500 | -0.33352700 |
| H | 8.52894200  | -2.06571600 | -0.71179200 |
| H | 9.75469200  | -1.08545500 | 0.15317600  |
| H | 8.81448000  | -0.35617600 | -1.18714600 |

## INT1-2

E=-1437,13350052

|   |             |             |             |
|---|-------------|-------------|-------------|
| C | 0.35718100  | -0.89403500 | 0.51905900  |
| C | 0.34355900  | 0.45326400  | 0.11263000  |
| C | -1.02924700 | 0.78138500  | -0.15055100 |
| H | -1.16022800 | -2.25083000 | 0.86547800  |
| H | -1.39602200 | 1.72068900  | -0.55546400 |
| C | -3.24474800 | -0.56874000 | -0.02337200 |
| C | -3.78866900 | -1.86096800 | -0.10736900 |

|   |             |             |             |
|---|-------------|-------------|-------------|
| C | -4.14624000 | 0.51749500  | -0.07142900 |
| C | -5.16521700 | -2.07709600 | -0.22723900 |
| H | -3.13115300 | -2.73426600 | -0.10340000 |
| C | -5.51314400 | 0.31813700  | -0.19973500 |
| H | -3.76436200 | 1.53759100  | 0.00834400  |
| C | -6.04192400 | -0.98386400 | -0.27648700 |
| H | -5.53673100 | -3.09984700 | -0.29207500 |
| H | -6.20664000 | 1.16080400  | -0.23349300 |
| C | 1.52700200  | 1.31284900  | -0.05277500 |
| C | 1.37779200  | 2.80826100  | -0.02543200 |
| C | 0.38655100  | 3.47589900  | 0.71488000  |
| C | 2.33809800  | 3.57172100  | -0.71522900 |
| C | 0.34186500  | 4.87092400  | 0.75431400  |
| H | -0.34235100 | 2.90367600  | 1.29030700  |
| C | 2.29471600  | 4.96320000  | -0.69963800 |
| H | 3.12227700  | 3.04587300  | -1.26288400 |
| C | 1.29223700  | 5.59483700  | 0.03756300  |
| H | -0.41227400 | 5.40497500  | 1.33555300  |
| H | 3.02373900  | 5.56893500  | -1.24145900 |
| O | 2.65066100  | 0.84056900  | -0.22488200 |
| C | 1.42101600  | -1.84354000 | 1.04467200  |
| N | 2.50352400  | -2.00837300 | 0.11574200  |
| C | -1.80267800 | -0.34009100 | 0.10436500  |
| N | -0.92752100 | -1.32668300 | 0.51633800  |
| C | 3.72373200  | -2.51355600 | 0.70829900  |
| H | 3.53116900  | -3.45570000 | 1.24489100  |
| H | 4.17745500  | -1.82602500 | 1.45769400  |
| C | 4.78404200  | -2.76728700 | -0.34582700 |
| O | 4.76259300  | -2.35357300 | -1.47615500 |
| O | 5.79489300  | -3.49552300 | 0.16697900  |
| C | 6.89663300  | -3.74654600 | -0.70487800 |
| H | 7.35383900  | -2.80335600 | -1.04133900 |
| H | 7.61954900  | -4.33378300 | -0.12503700 |
| H | 6.57347300  | -4.31025000 | -1.59337500 |
| F | 1.24770800  | 6.93262600  | 0.06318200  |
| O | -7.38970300 | -1.07803700 | -0.39423100 |
| C | -7.98880600 | -2.35153600 | -0.47247500 |
| H | -9.07085400 | -2.18424800 | -0.55839400 |
| H | -7.64346100 | -2.91546100 | -1.35801400 |
| H | -7.79148400 | -2.95571500 | 0.43171200  |
| O | 0.83344200  | -3.11684000 | 1.31082600  |
| H | 1.75219700  | -1.47703300 | 2.04153000  |
| H | 2.68411100  | -1.13429700 | -0.38528400 |
| H | 0.95875800  | -3.60701500 | 0.48114000  |

#### INT1'-2

E=-1437,1331573

|   |             |             |             |
|---|-------------|-------------|-------------|
| C | -0.26350800 | -1.58954400 | -1.66683900 |
| C | 0.27329500  | -0.49675600 | -0.94973500 |
| C | -0.80714600 | 0.14187000  | -0.31462700 |
| H | -2.28504000 | -2.21275100 | -1.89639900 |
| H | -0.72894000 | 1.00544500  | 0.33994000  |
| C | -3.37098500 | -0.28974400 | -0.23069300 |

|   |             |             |             |
|---|-------------|-------------|-------------|
| C | -4.35339500 | -1.30425500 | -0.23869900 |
| C | -3.76465800 | 0.99305400  | 0.18724200  |
| C | -5.66324200 | -1.04441600 | 0.13989600  |
| H | -4.08530800 | -2.32667500 | -0.51860300 |
| C | -5.07662800 | 1.26654500  | 0.57681200  |
| H | -3.03404000 | 1.80459500  | 0.19240000  |
| C | -6.04195300 | 0.24641300  | 0.55283800  |
| H | -6.41992700 | -1.83128700 | 0.13981600  |
| H | -5.33650900 | 2.27829600  | 0.88791900  |
| C | 1.74931200  | -0.10924700 | -0.81713700 |
| C | 2.41474100  | -1.01771500 | 0.24710200  |
| C | 2.01389900  | -0.94216500 | 1.59094400  |
| C | 3.41926000  | -1.92747400 | -0.10384500 |
| C | 2.59510900  | -1.75657900 | 2.56303600  |
| H | 1.24071000  | -0.22728500 | 1.87875300  |
| C | 4.00894300  | -2.75465400 | 0.85809100  |
| H | 3.75186500  | -1.98550400 | -1.13982800 |
| C | 3.58740200  | -2.65837900 | 2.17979300  |
| H | 2.29395800  | -1.70406400 | 3.61134200  |
| H | 4.79286500  | -3.46752900 | 0.59447700  |
| O | 2.40797800  | -0.20835900 | -2.06220100 |
| C | 0.32916400  | -2.58603200 | -2.51746800 |
| H | -0.38332700 | -3.37095600 | -2.87830700 |
| O | 1.50500600  | -2.63587500 | -2.86786400 |
| C | -1.98775000 | -0.55003300 | -0.63382700 |
| N | -1.63241000 | -1.59139700 | -1.43401200 |
| N | 1.79258300  | 1.26545800  | -0.36209100 |
| H | 2.23512400  | -1.09469000 | -2.45020600 |
| H | 1.25253700  | 1.85256000  | -0.99901800 |
| H | 3.79511400  | 1.58865200  | -1.06278300 |
| C | 3.11683700  | 1.84018900  | -0.22162200 |
| H | 3.61609100  | 1.49061800  | 0.69562300  |
| C | 3.02005700  | 3.34979800  | -0.18278700 |
| O | 2.07935300  | 3.99322500  | -0.58291300 |
| O | 4.13970300  | 3.89936600  | 0.31515900  |
| C | 4.19530900  | 5.32570100  | 0.32666700  |
| H | 5.17219800  | 5.59066000  | 0.74963300  |
| H | 4.09838200  | 5.73057100  | -0.69236800 |
| H | 3.38639500  | 5.74436600  | 0.94459900  |
| F | 4.14914700  | -3.44750700 | 3.11042900  |
| O | -7.33830500 | 0.40458500  | 0.90545900  |
| C | -7.79100700 | 1.66797700  | 1.34340600  |
| H | -7.67604500 | 2.43888800  | 0.56057000  |
| H | -8.85797600 | 1.55341500  | 1.57588300  |
| H | -7.25989200 | 2.00095700  | 2.25300400  |

**TS2-2 (non-assisted)**

E=-1437,0559205

|   |             |             |            |
|---|-------------|-------------|------------|
| C | -0.12774300 | 0.58823700  | 0.59692900 |
| C | -0.15538800 | -0.80713500 | 0.76832300 |
| C | -1.49322300 | -1.22035600 | 0.55475300 |
| H | -1.70583200 | 1.94523300  | 0.22755100 |
| H | -1.84478900 | -2.24873800 | 0.58390000 |

|   |             |             |             |
|---|-------------|-------------|-------------|
| C | -3.67877300 | 0.02594500  | -0.09651600 |
| C | -4.17623400 | 1.10966700  | -0.85288900 |
| C | -4.60061300 | -0.94468800 | 0.33146900  |
| C | -5.52691400 | 1.22022200  | -1.15530400 |
| H | -3.49060600 | 1.86933600  | -1.23769100 |
| C | -5.95961100 | -0.85002800 | 0.02729600  |
| H | -4.25319100 | -1.78709100 | 0.93349200  |
| C | -6.43666800 | 0.24014200  | -0.71888200 |
| H | -5.90866900 | 2.05571200  | -1.74528400 |
| H | -6.63745600 | -1.62482500 | 0.38550000  |
| C | 0.91958600  | -1.78070400 | 1.15210800  |
| C | 2.16434700  | -1.91832800 | 0.33048900  |
| C | 2.36882000  | -1.24048900 | -0.88183900 |
| C | 3.14574800  | -2.81979200 | 0.78195500  |
| C | 3.52958800  | -1.44841500 | -1.62728200 |
| H | 1.62432600  | -0.53457400 | -1.24944300 |
| C | 4.31092500  | -3.03453700 | 0.05131500  |
| H | 2.96723800  | -3.34729500 | 1.72067600  |
| C | 4.48500900  | -2.34216600 | -1.14813700 |
| H | 3.70407200  | -0.92279000 | -2.56757300 |
| H | 5.08530400  | -3.72648800 | 0.38839200  |
| O | 0.71087400  | -2.52847400 | 2.09305800  |
| C | 0.89938900  | 1.56949800  | 0.81684500  |
| N | 2.07970200  | 1.22148000  | 1.37609000  |
| C | -2.25738300 | -0.09657100 | 0.23346700  |
| N | -1.40706200 | 0.97764500  | 0.25492400  |
| C | 3.16317400  | 2.16873000  | 1.21931100  |
| H | 4.01220900  | 1.86566300  | 1.84832200  |
| H | 2.88501200  | 3.19480300  | 1.54321100  |
| C | 3.64562300  | 2.28922700  | -0.21797100 |
| O | 2.98256100  | 2.04393300  | -1.19799600 |
| O | 4.90032700  | 2.75904500  | -0.26732700 |
| C | 5.44920500  | 2.98627200  | -1.56707000 |
| H | 6.44815900  | 3.40985300  | -1.40704800 |
| H | 5.52268400  | 2.04259100  | -2.12826700 |
| H | 4.82284800  | 3.68668100  | -2.13993100 |
| O | -7.73222400 | 0.43021100  | -1.06329400 |
| C | -8.70132200 | -0.51690600 | -0.66986400 |
| H | -8.77098000 | -0.60095400 | 0.42957900  |
| H | -9.66345900 | -0.15992000 | -1.06059000 |
| H | -8.49289500 | -1.51684400 | -1.09100300 |
| F | 5.60396200  | -2.54308600 | -1.85844500 |
| H | 0.79269700  | 2.51926700  | 0.27469100  |
| O | 0.47411700  | 2.18316700  | 2.73523300  |
| H | 1.56606500  | 1.38226000  | 2.43020500  |
| H | -0.29736800 | 1.82199200  | 3.20178500  |

**TS2-2 (assisted by EtOH)**

E=-1592,23653976

|   |             |             |            |
|---|-------------|-------------|------------|
| C | -0.32328200 | -0.79982600 | 0.34332400 |
| C | 1.06750800  | -1.05372300 | 0.37146600 |
| C | 1.69559100  | 0.20212300  | 0.15474500 |

|   |             |             |             |
|---|-------------|-------------|-------------|
| H | -1.48961100 | 0.94549700  | 0.33227300  |
| H | 2.76439800  | 0.39177900  | 0.11848200  |
| C | 0.79614100  | 2.61733300  | -0.17621300 |
| C | -0.31735100 | 3.38633400  | -0.58095200 |
| C | 2.01172700  | 3.29178700  | 0.02537300  |
| C | -0.21544200 | 4.75804500  | -0.77046700 |
| H | -1.27790600 | 2.89915400  | -0.76171400 |
| C | 2.12882000  | 4.67010300  | -0.16677900 |
| H | 2.89154100  | 2.73504600  | 0.35526500  |
| C | 1.00996100  | 5.41770100  | -0.56728900 |
| H | -1.07689100 | 5.34993800  | -1.08587300 |
| H | 3.09254000  | 5.14933100  | 0.00598900  |
| C | 1.67976700  | -2.37632500 | 0.62899000  |
| C | 3.10904900  | -2.63479800 | 0.24334000  |
| C | 3.74058500  | -2.02035300 | -0.85211100 |
| C | 3.81489400  | -3.60886100 | 0.97393000  |
| C | 5.05065100  | -2.35458100 | -1.20119400 |
| H | 3.19713500  | -1.29591400 | -1.46000300 |
| C | 5.12787600  | -3.93812700 | 0.64892700  |
| H | 3.30645700  | -4.10457600 | 1.80290900  |
| C | 5.72930000  | -3.30224200 | -0.43816600 |
| H | 5.55050200  | -1.89791100 | -2.05753700 |
| H | 5.69340200  | -4.68084900 | 1.21505000  |
| O | 1.04156000  | -3.27085200 | 1.17631100  |
| C | -1.41893800 | -1.73790900 | 0.48052000  |
| N | -2.52339800 | -1.65820400 | -0.25888400 |
| C | 0.69086800  | 1.16806200  | 0.02168300  |
| N | -0.51521900 | 0.53060000  | 0.11272300  |
| H | -1.13652300 | -2.71828700 | 0.86584900  |
| H | -2.84627200 | -0.70428300 | -0.47473400 |
| O | -2.24241100 | -1.08087400 | 2.26222100  |
| H | -2.61601400 | -0.12383100 | 1.76479700  |
| H | -1.52720000 | -0.83851600 | 2.86753200  |
| O | -2.91545700 | 0.82769800  | 0.91737900  |
| C | -3.87945800 | 1.77824100  | 1.25903500  |
| H | -4.11587400 | 2.41224300  | 0.37846200  |
| H | -4.83761700 | 1.28371200  | 1.53289500  |
| C | -3.44850500 | 2.68197900  | 2.41599700  |
| H | -2.52567800 | 3.22982700  | 2.16185200  |
| H | -4.22917800 | 3.42213200  | 2.66266900  |
| H | -3.24803400 | 2.08630400  | 3.32273400  |
| C | -4.70353300 | -2.38064200 | -1.06254200 |
| H | -4.03276900 | -2.47836700 | 0.96827000  |
| O | 1.01322900  | 6.75659200  | -0.77949700 |
| C | 2.20751100  | 7.48331900  | -0.59833900 |
| H | 1.97370800  | 8.53191600  | -0.82634400 |
| H | 2.57586700  | 7.41771200  | 0.44151100  |
| H | 3.00641900  | 7.13913000  | -1.27997900 |
| F | 6.98921600  | -3.61818900 | -0.76124300 |
| C | -3.60197400 | -2.59886300 | -0.04341300 |
| H | -3.23630500 | -3.63515200 | -0.11212800 |
| O | -4.78469800 | -1.42523400 | -1.79183300 |
| O | -5.59326700 | -3.38060900 | -1.01702800 |

|   |             |             |             |
|---|-------------|-------------|-------------|
| C | -6.72078500 | -3.26918600 | -1.89037400 |
| H | -6.39681700 | -3.23683500 | -2.94136400 |
| H | -7.33620900 | -4.15827800 | -1.70803700 |
| H | -7.29322200 | -2.35526500 | -1.67187900 |

**TS2'-2 (non-assisted)**

E=-1437,05931666

|   |             |             |             |
|---|-------------|-------------|-------------|
| C | -0.15683900 | -1.76876100 | -0.22055400 |
| C | 0.22011600  | -0.45533900 | 0.13747300  |
| C | -0.98031000 | 0.29834000  | 0.24863300  |
| H | -2.00982800 | -2.62468700 | -0.58740800 |
| H | -1.04948700 | 1.34082100  | 0.54812000  |
| C | -3.49666300 | -0.29272100 | -0.01128400 |
| C | -4.43755900 | -1.33340500 | 0.05887800  |
| C | -3.99033700 | 1.02880400  | -0.07535000 |
| C | -5.81251500 | -1.08413900 | 0.05919400  |
| H | -4.10409900 | -2.37129600 | 0.13741600  |
| C | -5.35228000 | 1.29090100  | -0.07032300 |
| H | -3.29012200 | 1.86377500  | -0.14529200 |
| C | -6.28262200 | 0.23639500  | -0.00506700 |
| H | -6.50312200 | -1.92520700 | 0.11947200  |
| H | -5.73195100 | 2.31308100  | -0.12425300 |
| C | 1.57613800  | 0.04477900  | 0.32516200  |
| C | 1.85439700  | 1.48521700  | 0.06044800  |
| C | 1.54637800  | 2.07149500  | -1.17818900 |
| C | 2.44294200  | 2.26832700  | 1.07094000  |
| C | 1.84801200  | 3.41373100  | -1.42119900 |
| H | 1.07569600  | 1.47350000  | -1.96172800 |
| C | 2.73322200  | 3.61185500  | 0.84079600  |
| H | 2.60944400  | 1.79010000  | 2.03941500  |
| C | 2.43840300  | 4.16386300  | -0.40642000 |
| H | 1.62774000  | 3.88651100  | -2.38014800 |
| H | 3.17376900  | 4.24326000  | 1.61500500  |
| O | 1.63440500  | -0.31412400 | 2.49551200  |
| C | 0.55243600  | -2.99786000 | -0.58347300 |
| O | -0.06870900 | -4.00508900 | -0.88982100 |
| H | 1.66094800  | -2.96264700 | -0.57348300 |
| C | -2.05489300 | -0.55315900 | -0.01406400 |
| N | -1.52285300 | -1.78416100 | -0.29109500 |
| N | 2.56166700  | -0.85897600 | 0.45953000  |
| H | 4.37391200  | -0.15823200 | 1.32355500  |
| H | 2.26296200  | -1.22768300 | 1.46051200  |
| H | 0.97816500  | -0.39583900 | 3.20550300  |
| C | 3.96069600  | -0.51906500 | 0.36548900  |
| H | 4.13977800  | 0.28275900  | -0.36893500 |
| C | 4.77675300  | -1.72937400 | -0.06975900 |
| O | 4.33835800  | -2.79851200 | -0.40893600 |
| O | 6.08776600  | -1.43401200 | -0.03360200 |
| C | 6.98396400  | -2.47197800 | -0.43407000 |
| H | 6.87634500  | -3.35318800 | 0.21630600  |
| H | 6.78746700  | -2.78006600 | -1.47224100 |
| H | 7.99456000  | -2.05480900 | -0.34546200 |
| F | 2.72009500  | 5.45378000  | -0.63079900 |

|   |             |             |             |
|---|-------------|-------------|-------------|
| O | -7.58953300 | 0.59021300  | -0.00910200 |
| C | -8.57989300 | -0.41279800 | 0.05001500  |
| H | -8.50909400 | -1.00565800 | 0.97969400  |
| H | -9.54896500 | 0.10329700  | 0.03066300  |
| H | -8.52223300 | -1.09830100 | -0.81462200 |

**TS2'-2 (assisted by EtOH)**

E=-1592,22408335

|   |             |             |             |
|---|-------------|-------------|-------------|
| C | -0.32815100 | -1.38977100 | -0.78733900 |
| C | -0.01910700 | -0.13969700 | -0.21368300 |
| C | -1.25914500 | 0.48973300  | 0.08557600  |
| H | -2.13456200 | -2.30913600 | -1.21455000 |
| H | -1.38112000 | 1.45847400  | 0.56329200  |
| C | -3.74243200 | -0.22842300 | -0.18014900 |
| C | -4.60571600 | -1.33475000 | -0.24331000 |
| C | -4.32651200 | 1.04511800  | -0.00411800 |
| C | -5.99226300 | -1.19296100 | -0.14368900 |
| H | -4.19905300 | -2.34359400 | -0.35056800 |
| C | -5.70081900 | 1.19955600  | 0.10221300  |
| H | -3.68896600 | 1.93091200  | 0.03393600  |
| C | -6.55307100 | 0.08133400  | 0.03155900  |
| H | -6.62026800 | -2.08236700 | -0.19376700 |
| H | -6.15089000 | 2.18548000  | 0.23374000  |
| C | 1.30244400  | 0.43057900  | 0.06001700  |
| C | 1.42577700  | 1.92613400  | 0.07945300  |
| C | 1.14823700  | 2.64159800  | -1.09810800 |
| C | 1.84089900  | 2.62148600  | 1.22690300  |
| C | 1.29938300  | 4.02909700  | -1.13999500 |
| H | 0.81278500  | 2.11042900  | -1.99193000 |
| C | 1.98498500  | 4.00947800  | 1.19544300  |
| H | 2.00402700  | 2.04078800  | 2.13651900  |
| C | 1.71730600  | 4.69387600  | 0.01121500  |
| H | 1.09317300  | 4.60066300  | -2.04686300 |
| H | 2.29581000  | 4.57015100  | 2.07932200  |
| O | 1.20681700  | -0.01071000 | 2.26742300  |
| C | 0.43290600  | -2.49628500 | -1.37738600 |
| O | -0.14117100 | -3.48217100 | -1.80864600 |
| H | 1.53349800  | -2.38485900 | -1.43984000 |
| C | -2.28870200 | -0.37670400 | -0.28536500 |
| N | -1.68996000 | -1.49340200 | -0.80382300 |
| N | 2.37175900  | -0.32847100 | -0.11930300 |
| H | 4.02024800  | 0.23493000  | 1.08321600  |
| O | 1.73778300  | -2.21704100 | 1.45600300  |
| H | 1.43874500  | -1.19553600 | 1.98279400  |
| C | 2.61747900  | -3.01761800 | 2.19484800  |
| H | 2.13899400  | -3.33138900 | 3.14729200  |
| H | 3.53541900  | -2.45992200 | 2.49531400  |
| C | 3.02521600  | -4.26060200 | 1.41170700  |
| H | 3.55767500  | -3.98228800 | 0.48767000  |
| H | 3.68512700  | -4.91145900 | 2.01011200  |
| H | 2.13248900  | -4.83952700 | 1.12518500  |
| H | 0.28065000  | 0.03323800  | 2.54372700  |
| H | 2.22517900  | -1.32704900 | 0.29803100  |

|   |             |             |             |
|---|-------------|-------------|-------------|
| C | 3.72609800  | 0.14941900  | 0.02067600  |
| H | 3.85485200  | 1.14977500  | -0.41851600 |
| C | 4.69242800  | -0.81084600 | -0.65525500 |
| O | 4.39251000  | -1.85422200 | -1.17861500 |
| O | 5.94432300  | -0.33917000 | -0.57451400 |
| C | 6.97157300  | -1.15513400 | -1.14488600 |
| H | 7.01139400  | -2.13499700 | -0.64591000 |
| H | 6.79050800  | -1.31584000 | -2.21814500 |
| H | 7.91171500  | -0.61135600 | -0.99319300 |
| F | 1.85731200  | 6.02567100  | -0.02076700 |
| O | -7.87910000 | 0.33157800  | 0.14159300  |
| C | -8.79494600 | -0.73962000 | 0.07593800  |
| H | -8.63396800 | -1.46814000 | 0.89085900  |
| H | -9.79620800 | -0.30174000 | 0.18340300  |
| H | -8.73813900 | -1.26963500 | -0.89187600 |

## INT2-2

E=-1360,65849477

|   |             |             |             |
|---|-------------|-------------|-------------|
| C | 0.33383800  | -1.06145600 | 0.22046300  |
| C | -1.01088200 | -0.74006900 | -0.05159600 |
| C | -1.07062700 | 0.68124100  | -0.15810600 |
| H | 2.01865500  | 0.11228500  | 0.50715600  |
| H | -1.94115300 | 1.27277800  | -0.42702300 |
| C | 0.70839900  | 2.56704400  | 0.01546400  |
| C | 2.06967700  | 2.86081200  | -0.17013500 |
| C | -0.17772700 | 3.65664300  | 0.16432600  |
| C | 2.54186600  | 4.17597000  | -0.20102800 |
| H | 2.79022700  | 2.05275900  | -0.32029000 |
| C | 0.27639200  | 4.96686700  | 0.12827400  |
| H | -1.24106100 | 3.46831900  | 0.32711700  |
| C | 1.64450100  | 5.24405800  | -0.05246800 |
| H | 3.60673400  | 4.35238600  | -0.35272600 |
| H | -0.41028900 | 5.80722400  | 0.24778500  |
| C | -2.08107800 | -1.74300700 | -0.24911200 |
| C | -3.52469000 | -1.33179700 | -0.14920800 |
| C | -3.98218900 | -0.29344500 | 0.68037500  |
| C | -4.46774400 | -2.09083700 | -0.86667200 |
| C | -5.34508600 | -0.00563800 | 0.78024300  |
| H | -3.27340800 | 0.27890300  | 1.28025900  |
| C | -5.82786300 | -1.80312700 | -0.79163800 |
| H | -4.10689900 | -2.91601700 | -1.48341300 |
| C | -6.24807300 | -0.75925600 | 0.03373100  |
| H | -5.71824700 | 0.78741800  | 1.43109500  |
| H | -6.56997600 | -2.37370400 | -1.35351200 |
| O | -1.81179100 | -2.91091000 | -0.50563500 |
| C | 1.02330700  | -2.32095400 | 0.44448000  |
| H | 0.42303100  | -3.23513000 | 0.30819400  |
| N | 2.26160900  | -2.31556700 | 0.76580600  |
| H | 2.27348400  | -4.45819000 | 0.81379900  |
| C | 0.21249900  | 1.18880000  | 0.04821500  |
| N | 1.02811300  | 0.11005900  | 0.28232700  |
| C | 2.92893700  | -3.57251300 | 0.95600600  |
| H | 3.32831300  | -3.64068800 | 1.98338900  |



|   |             |             |             |
|---|-------------|-------------|-------------|
| C | 4.11090900  | -3.73304100 | 0.00570700  |
| O | 4.33689100  | -3.06067400 | -0.96515200 |
| O | 4.87258800  | -4.77573700 | 0.39249400  |
| C | 5.98981600  | -5.08414400 | -0.44046100 |
| H | 6.68880400  | -4.23519700 | -0.48910300 |
| H | 6.48044400  | -5.95415600 | 0.01340400  |
| H | 5.66256400  | -5.32218300 | -1.46423000 |
| F | -7.55497000 | -0.48048100 | 0.11677000  |
| O | 1.99325200  | 6.55320100  | -0.06904800 |
| C | 3.34755600  | 6.90679200  | -0.24186200 |
| H | 3.74397700  | 6.55494200  | -1.21143600 |
| H | 3.39000900  | 8.00389400  | -0.21795300 |
| H | 3.98352500  | 6.50654900  | 0.56836000  |

## INT2'-2

E=-1360,65131481

|   |             |             |             |
|---|-------------|-------------|-------------|
| C | 0.03472000  | -1.95305200 | 0.01353900  |
| C | 0.35059400  | -0.59213800 | -0.17545400 |
| C | -0.88417900 | 0.10838300  | -0.21363000 |
| H | -1.77720200 | -2.94766000 | 0.19754500  |
| H | -1.00865000 | 1.18128300  | -0.33577600 |
| C | -3.37314700 | -0.62601000 | -0.02629000 |
| C | -4.24387400 | -1.61570300 | 0.47995700  |
| C | -3.95268400 | 0.56371300  | -0.49888100 |
| C | -5.61887600 | -1.42528000 | 0.50714600  |
| H | -3.84197500 | -2.54986200 | 0.88026900  |
| C | -5.33308000 | 0.77105600  | -0.47233200 |
| H | -3.31435600 | 1.34643900  | -0.91401800 |
| C | -6.18192400 | -0.22755800 | 0.03151300  |
| H | -6.28790900 | -2.19171600 | 0.90312800  |
| H | -5.73492600 | 1.70951900  | -0.85446800 |
| C | 1.70375400  | -0.01950600 | -0.32434000 |
| C | 1.84488300  | 1.46093100  | -0.09076000 |
| C | 2.36969700  | 2.30214800  | -1.08663100 |
| C | 1.45522400  | 2.03138100  | 1.13412500  |
| C | 2.50665100  | 3.67520500  | -0.87222200 |
| H | 2.66204300  | 1.88073500  | -2.05122200 |
| C | 1.60044800  | 3.39958900  | 1.36878300  |
| H | 1.03752400  | 1.39378000  | 1.91655700  |
| C | 2.12328900  | 4.20446300  | 0.35809100  |
| H | 2.90407500  | 4.33936200  | -1.64211700 |
| H | 1.31217500  | 3.85204000  | 2.31963000  |
| C | 0.81255000  | -3.18103500 | 0.18399300  |
| O | 0.25320700  | -4.25835300 | 0.33104900  |
| H | 1.91566800  | -3.07091500 | 0.17936100  |
| C | -1.92111300 | -0.81968800 | -0.05838700 |
| N | -1.32958200 | -2.04369900 | 0.07980000  |
| N | 2.66316500  | -0.81047400 | -0.63739300 |
| H | 4.27667600  | 0.56344600  | -0.22335200 |
| C | 4.03336400  | -0.39980300 | -0.71390900 |
| H | 4.34349700  | -0.28488500 | -1.76916800 |
| C | 4.94942300  | -1.46053000 | -0.11067900 |
| O | 4.60724500  | -2.45016400 | 0.48151300  |

|   |             |             |             |
|---|-------------|-------------|-------------|
| O | 6.23679700  | -1.12087400 | -0.31918500 |
| C | 7.21922000  | -2.00848900 | 0.21490900  |
| H | 7.11700300  | -3.01409800 | -0.22068000 |
| H | 8.19467700  | -1.57897100 | -0.04512500 |
| H | 7.11905800  | -2.09276500 | 1.30785700  |
| F | 2.25688800  | 5.51978900  | 0.57367600  |
| O | -7.53157400 | -0.13076500 | 0.09952900  |
| C | -8.16589200 | 1.04407900  | -0.35470500 |
| H | -7.97993700 | 1.22280700  | -1.42917800 |
| H | -9.24324800 | 0.89748600  | -0.20043200 |
| H | -7.84095200 | 1.93341300  | 0.21498800  |

### TS3-2

E=-1360,61139607

|   |             |             |             |
|---|-------------|-------------|-------------|
| C | 0.22741200  | -1.67859800 | -0.53987900 |
| C | 0.42039900  | -0.25244100 | -0.35817800 |
| C | -0.89324300 | 0.30075800  | -0.09676100 |
| H | -1.55161400 | -2.79578700 | -0.53493000 |
| H | -1.12688900 | 1.34720400  | 0.06552500  |
| C | -3.27747600 | -0.68807100 | -0.02090600 |
| C | -4.00325200 | -1.83799300 | 0.35751000  |
| C | -4.00481100 | 0.49379300  | -0.24122300 |
| C | -5.38425300 | -1.80708300 | 0.50283100  |
| H | -3.48085000 | -2.77430700 | 0.57146400  |
| C | -5.39167400 | 0.54128600  | -0.09194000 |
| H | -3.47934700 | 1.39767200  | -0.55695200 |
| C | -6.09675100 | -0.61534600 | 0.28047400  |
| H | -5.94197500 | -2.69683000 | 0.80119700  |
| H | -5.91274600 | 1.47999600  | -0.28011300 |
| C | 1.59432800  | 0.48863200  | -0.62865800 |
| C | 1.72381800  | 1.93702400  | -0.34130000 |
| C | 1.12284500  | 2.55221500  | 0.77484700  |
| C | 2.54535300  | 2.72098600  | -1.17798600 |
| C | 1.31175100  | 3.90911200  | 1.03521500  |
| H | 0.53289500  | 1.95726400  | 1.47300600  |
| C | 2.73192200  | 4.07903700  | -0.93481000 |
| H | 3.03654500  | 2.24629500  | -2.02850900 |
| C | 2.10716600  | 4.65804200  | 0.16967100  |
| H | 0.86499400  | 4.39208200  | 1.90629800  |
| H | 3.35542500  | 4.69723600  | -1.58346700 |
| O | 2.63535000  | -0.04213000 | -1.21014700 |
| C | 1.06701200  | -2.78735300 | -0.87037700 |
| H | 0.53675400  | -3.61159300 | -1.37220400 |
| N | 2.34723800  | -2.99433000 | -0.66354500 |
| C | -1.81857700 | -0.71183500 | -0.17158200 |
| N | -1.12525100 | -1.88289700 | -0.43848400 |
| C | 3.12641000  | -2.21781200 | 0.09659000  |
| H | 2.70195300  | -1.59517400 | 0.90399200  |
| H | 2.98472600  | -0.96323500 | -0.79291800 |
| C | 4.54361500  | -2.60376100 | 0.28377600  |
| O | 5.16529700  | -3.43749600 | -0.32940900 |
| O | 5.10179700  | -1.83384400 | 1.25972800  |
| C | 6.48047000  | -2.06418300 | 1.51624300  |

|   |             |             |             |
|---|-------------|-------------|-------------|
| H | 6.77180500  | -1.35916500 | 2.30594400  |
| H | 6.65545400  | -3.09913800 | 1.85082500  |
| H | 7.08751600  | -1.89321900 | 0.61292000  |
| O | -7.43839600 | -0.67966100 | 0.44638900  |
| C | -8.21988500 | 0.47840900  | 0.24711000  |
| H | -8.13927900 | 0.85498300  | -0.78840500 |
| H | -9.26140000 | 0.18901400  | 0.43991100  |
| H | -7.93864600 | 1.28824800  | 0.94402100  |
| F | 2.28476800  | 5.96168700  | 0.41112300  |

### TS3'-2

E= -1515,67745547

|   |             |             |             |
|---|-------------|-------------|-------------|
| C | -0.30607200 | -1.23164700 | 1.06452100  |
| C | 0.08795300  | -0.44705600 | -0.01862700 |
| C | -1.08394600 | 0.11589600  | -0.57253200 |
| H | -2.22771300 | -1.53801800 | 1.92660000  |
| H | -1.13660200 | 0.74950900  | -1.45454900 |
| C | -3.60006000 | -0.01489000 | 0.06238900  |
| C | -4.03066500 | 1.15137700  | -0.60856800 |
| C | -5.37864400 | 1.44772700  | -0.74824400 |
| H | -3.28850100 | 1.84376400  | -1.01121900 |
| C | -5.95313900 | -0.57459100 | 0.45443200  |
| H | -4.30880900 | -1.79943800 | 1.07350800  |
| C | -6.35863600 | 0.58973600  | -0.21490800 |
| H | -5.70813000 | 2.35251500  | -1.26288700 |
| H | -6.68421200 | -1.26889000 | 0.86882000  |
| C | 1.51419600  | -0.36570000 | -0.53290000 |
| C | 2.01882300  | 1.09066700  | -0.57441400 |
| C | 1.56386000  | 2.08536400  | 0.30483100  |
| C | 2.93823400  | 1.45065000  | -1.57184700 |
| C | 2.02148900  | 3.40268700  | 0.20401800  |
| H | 0.84619300  | 1.83254400  | 1.08614300  |
| C | 3.40845900  | 2.75988800  | -1.68406400 |
| H | 3.25920400  | 0.68165200  | -2.27446200 |
| C | 2.94186200  | 3.72185200  | -0.79069600 |
| H | 1.66817200  | 4.18333400  | 0.88078900  |
| H | 4.12033100  | 3.04934500  | -2.46012500 |
| O | 1.64805900  | -0.89890500 | -1.78051900 |
| C | 0.55771500  | -2.09738200 | 1.81281900  |
| H | 0.12087900  | -2.75366000 | 2.58094400  |
| N | 1.82193800  | -2.21741300 | 1.60067600  |
| C | 2.42763800  | -1.27522900 | 0.65068800  |
| C | 3.07830000  | -0.22808800 | 1.58816000  |
| O | 2.56206500  | 0.25477200  | 2.56021800  |
| O | 4.32851800  | 0.04724700  | 1.18180200  |
| C | 5.02552100  | 1.05738700  | 1.91634400  |
| H | 6.02230500  | 1.12786800  | 1.46439300  |
| H | 4.50119100  | 2.02068500  | 1.83450300  |
| H | 5.10200500  | 0.78147400  | 2.97847900  |
| H | 3.35336000  | -1.67253000 | 0.19358300  |
| C | -4.59154700 | -0.86537100 | 0.58023800  |
| C | -2.17235900 | -0.31542700 | 0.19418900  |
| N | -1.67874900 | -1.14179700 | 1.17490800  |

|   |             |             |             |
|---|-------------|-------------|-------------|
| H | 2.22056400  | -2.37140200 | -0.10959300 |
| O | 1.95230500  | -3.10877400 | -0.85585400 |
| H | 1.63923200  | -2.18176400 | -1.57028800 |
| C | 3.12953200  | -3.77541800 | -1.32751600 |
| H | 3.82966700  | -3.03276300 | -1.75259700 |
| H | 3.61754200  | -4.25100300 | -0.46012400 |
| C | 2.74927500  | -4.81207100 | -2.36758700 |
| H | 2.27077100  | -4.33936100 | -3.23949500 |
| H | 3.64662400  | -5.34640300 | -2.71658300 |
| H | 2.04802200  | -5.54692600 | -1.94384600 |
| F | 3.38281200  | 4.98728300  | -0.89675000 |
| O | -7.64799700 | 0.96620200  | -0.39647200 |
| C | -8.68365200 | 0.15710500  | 0.11364900  |
| H | -8.62325700 | 0.05550400  | 1.21248200  |
| H | -9.62723800 | 0.65569800  | -0.14546300 |
| H | -8.67764800 | -0.85195000 | -0.33700500 |

### INT3-2

E=-1360,62711462

|   |             |             |             |
|---|-------------|-------------|-------------|
| C | 0.25241300  | -1.21580100 | -0.06990800 |
| C | -1.15760000 | -0.79270400 | -0.08800700 |
| C | -1.13035100 | 0.66125000  | -0.06145000 |
| H | 1.99990200  | -0.10562300 | 0.05665200  |
| H | -1.99101700 | 1.31698500  | -0.14421200 |
| C | 0.74588100  | 2.41970900  | -0.01806700 |
| C | 2.09432400  | 2.65607800  | -0.33403500 |
| C | -0.05315600 | 3.53876700  | 0.30648500  |
| C | 2.63565900  | 3.94469900  | -0.33196800 |
| H | 2.74764200  | 1.82580000  | -0.61149100 |
| C | 0.46960600  | 4.82251300  | 0.30832100  |
| H | -1.10054500 | 3.39210000  | 0.57804400  |
| C | 1.82401800  | 5.04233600  | -0.01014600 |
| H | 3.68690500  | 4.07696600  | -0.58755200 |
| H | -0.14801400 | 5.68565400  | 0.56434200  |
| C | -2.25073300 | -1.63012700 | -0.14744600 |
| C | -3.66080900 | -1.21764900 | -0.05929600 |
| C | -4.09449700 | -0.19976500 | 0.81765900  |
| C | -4.63606300 | -1.88817600 | -0.83187900 |
| C | -5.44097900 | 0.14516200  | 0.90922300  |
| H | -3.36845300 | 0.30356600  | 1.45710700  |
| C | -5.98603300 | -1.55044700 | -0.74693100 |
| H | -4.32814200 | -2.66448000 | -1.53689600 |
| C | -6.37266500 | -0.53287700 | 0.12278500  |
| H | -5.78481800 | 0.92299100  | 1.59386400  |
| H | -6.74095100 | -2.05485200 | -1.35311900 |
| O | -2.02709500 | -2.95794600 | -0.35432300 |
| C | 0.86297700  | -2.46171500 | -0.05569600 |
| H | 0.26373200  | -3.37569500 | -0.10604700 |
| N | 2.21613500  | -2.48447800 | 0.02130700  |
| C | 0.18047100  | 1.06898600  | -0.02634000 |
| N | 0.99098600  | -0.05865700 | -0.03371600 |
| C | 2.89468200  | -3.58311900 | 0.04511100  |
| H | 2.42916900  | -4.58300700 | 0.00633700  |

|   |             |             |             |
|---|-------------|-------------|-------------|
| C | 4.36980500  | -3.53081600 | 0.12672800  |
| O | 5.06203700  | -2.53963300 | 0.17331200  |
| O | 4.87905400  | -4.79091900 | 0.14330300  |
| C | 6.29493600  | -4.88724400 | 0.21972700  |
| H | 6.67644600  | -4.41083900 | 1.13689300  |
| H | 6.53398200  | -5.95867800 | 0.22342700  |
| H | 6.77355900  | -4.39537900 | -0.64207400 |
| F | -7.66660200 | -0.20274700 | 0.21079600  |
| O | 2.24455600  | 6.32920600  | 0.02389500  |
| C | 3.59151300  | 6.62564900  | -0.27304100 |
| H | 3.86045400  | 6.32758200  | -1.30241300 |
| H | 3.70025600  | 7.71430200  | -0.17829200 |
| H | 4.28525100  | 6.13367200  | 0.43222400  |
| H | -2.81458600 | -3.45831000 | -0.09757300 |

**TS4-2 (non-assisted)**

E= -1360,57188308

|   |             |             |             |
|---|-------------|-------------|-------------|
| C | 0.19923200  | -2.03830400 | -0.18301700 |
| C | -0.30363900 | -0.79999700 | 0.23879600  |
| C | 0.80429400  | 0.09409300  | 0.35111600  |
| H | 2.16977100  | -2.61939400 | -0.68295700 |
| H | 0.77214800  | 1.13026000  | 0.67844700  |
| C | 3.35345400  | -0.20134300 | -0.01797400 |
| C | 3.69757800  | 1.15837600  | -0.18645900 |
| C | 5.02205200  | 1.56933300  | -0.21257400 |
| H | 2.90691600  | 1.90022900  | -0.31779400 |
| C | 5.74485900  | -0.72294700 | 0.08739500  |
| H | 4.18798800  | -2.18043300 | 0.29124800  |
| C | 6.06465200  | 0.63264400  | -0.07938200 |
| H | 5.28543200  | 2.62015200  | -0.34834000 |
| H | 6.52533200  | -1.47473400 | 0.20499300  |
| C | -1.73767400 | -0.62787500 | 0.46043600  |
| C | -2.24871500 | 0.77760200  | 0.25619000  |
| C | -2.33788500 | 1.24379800  | -1.06632600 |
| C | -2.58188600 | 1.64630100  | 1.30305400  |
| C | -2.75219900 | 2.54728200  | -1.34206000 |
| H | -2.08180700 | 0.57863000  | -1.89466200 |
| C | -2.99380800 | 2.95554000  | 1.04015600  |
| H | -2.53057500 | 1.28045600  | 2.32761500  |
| C | -3.07512100 | 3.38922800  | -0.27980900 |
| H | -2.82819400 | 2.91853700  | -2.36588200 |
| H | -3.25812800 | 3.64175000  | 1.84726600  |
| O | -2.04025300 | -0.95913800 | 2.16710900  |
| C | -0.66027400 | -3.13611200 | -0.52027600 |
| H | -0.24517300 | -4.08641700 | -0.88328700 |
| N | -1.94461100 | -3.00705300 | -0.44906500 |
| C | -2.54755200 | -1.85516300 | 0.04084200  |
| C | -3.98607400 | -1.72933500 | -0.36930200 |
| O | -4.56144900 | -2.43750000 | -1.15687900 |
| O | -4.60933300 | -0.73502100 | 0.31066700  |
| C | -5.97826300 | -0.51652700 | -0.01083500 |
| H | -6.30836200 | 0.32683500  | 0.60898200  |
| H | -6.10025300 | -0.27331900 | -1.07777100 |

|   |             |             |             |
|---|-------------|-------------|-------------|
| H | -6.58205500 | -1.41067500 | 0.20845900  |
| C | 4.40522700  | -1.12220600 | 0.12192200  |
| C | 1.94874000  | -0.61760800 | 0.01475000  |
| N | 1.55624400  | -1.91295400 | -0.29680800 |
| H | -2.56460000 | -1.84961300 | 1.43340400  |
| F | -3.47355100 | 4.64484000  | -0.53658500 |
| O | 7.32434700  | 1.12872300  | -0.12423600 |
| C | 8.42030700  | 0.24920800  | -0.00466900 |
| H | 8.43571400  | -0.50094100 | -0.81595300 |
| H | 9.32589600  | 0.86642200  | -0.07422600 |
| H | 8.42079700  | -0.27748300 | 0.96677300  |
| H | -1.20064000 | -1.30621200 | 2.51892200  |

**TS4-2 (assisted by 2 EtOH)**

E=-1670,86923630449

|   |             |             |             |
|---|-------------|-------------|-------------|
| C | 0.77422700  | -0.76644800 | -1.59844300 |
| C | 0.32072700  | -0.19551200 | -0.41369400 |
| C | 1.46367600  | 0.19932200  | 0.33212500  |
| H | 2.74215600  | -1.00937500 | -2.34910600 |
| H | 1.47091700  | 0.65578800  | 1.31884800  |
| C | 4.01629200  | 0.00117900  | -0.09789200 |
| C | 4.45402500  | 0.97404200  | 0.82925000  |
| C | 5.79792500  | 1.12717500  | 1.13754800  |
| H | 3.72156300  | 1.63333200  | 1.29980700  |
| C | 6.35988800  | -0.65327400 | -0.40287500 |
| H | 4.71019000  | -1.59566000 | -1.39284400 |
| C | 6.77051000  | 0.31730400  | 0.52198400  |
| H | 6.13135500  | 1.88394900  | 1.85059100  |
| H | 7.08324200  | -1.30604700 | -0.89191500 |
| C | -1.14957000 | -0.01889400 | -0.13040700 |
| C | -1.48806100 | 1.47849900  | -0.06583700 |
| C | -1.79004100 | 2.16195300  | -1.25441300 |
| C | -1.40328700 | 2.21690600  | 1.12424400  |
| C | -2.01367900 | 3.53925400  | -1.26041900 |
| H | -1.85225000 | 1.60828800  | -2.19401000 |
| C | -1.62890700 | 3.59608100  | 1.13525800  |
| H | -1.17089400 | 1.71341700  | 2.06318300  |
| C | -1.93088000 | 4.24084700  | -0.06002900 |
| H | -2.25359200 | 4.07535300  | -2.18081000 |
| H | -1.57603700 | 4.17485300  | 2.05954700  |
| O | -1.35536100 | -0.59713400 | 1.23463400  |
| C | -0.12214800 | -1.25765300 | -2.61230500 |
| H | 0.25793600  | -1.64402400 | -3.56831900 |
| N | -1.39682600 | -1.25912100 | -2.40334100 |
| C | -1.95396300 | -0.82791900 | -1.19894900 |
| C | -3.40201100 | -0.62025300 | -1.22057600 |
| O | -4.07311900 | -0.15515700 | -0.29173700 |
| O | -4.01230000 | -1.02899100 | -2.34630100 |
| C | -5.42948800 | -0.92453500 | -2.37591000 |
| H | -5.73838200 | -1.27962700 | -3.36773000 |
| H | -5.89472600 | -1.54600500 | -1.59385100 |
| H | -5.75805400 | 0.11562900  | -2.22698600 |
| C | 5.00050800  | -0.80474900 | -0.69574300 |

|   |             |             |             |
|---|-------------|-------------|-------------|
| C | 2.59306800  | -0.15046900 | -0.40693600 |
| N | 2.14737000  | -0.74216300 | -1.57589200 |
| H | -1.95886100 | -2.19196400 | -0.41499000 |
| O | -1.78621800 | -2.82542600 | 0.49385800  |
| H | -1.50358000 | -1.87416500 | 1.04348900  |
| C | -0.72129000 | -3.78643900 | 0.34251100  |
| H | -1.01485700 | -4.46109900 | -0.47648100 |
| H | 0.20207200  | -3.26406200 | 0.04095500  |
| C | -0.52469100 | -4.55150100 | 1.63691300  |
| H | -1.45208600 | -5.06461600 | 1.93456700  |
| H | 0.26606000  | -5.30832600 | 1.51249500  |
| H | -0.22218200 | -3.87761800 | 2.45417900  |
| F | -2.14891400 | 5.56629000  | -0.05683100 |
| O | 8.05873500  | 0.54701100  | 0.88223300  |
| C | 9.08558000  | -0.22021800 | 0.29759400  |
| H | 9.12178800  | -0.09269000 | -0.79979800 |
| H | 10.03006800 | 0.13937100  | 0.72774900  |
| H | 8.97714100  | -1.29647100 | 0.52520700  |
| H | -2.20488400 | -0.26554900 | 1.67522900  |
| H | -3.95435200 | 0.15968900  | 1.33669800  |
| O | -3.64834800 | 0.09227900  | 2.27727800  |
| C | -4.35501300 | -0.97399700 | 2.89931400  |
| H | -3.92756800 | -1.08913200 | 3.90938400  |
| H | -4.17683500 | -1.92586100 | 2.36076000  |
| C | -5.84795200 | -0.69296200 | 2.98644000  |
| H | -6.28265600 | -0.59452200 | 1.97848800  |
| H | -6.37163300 | -1.51201800 | 3.50605700  |
| H | -6.03442500 | 0.24442800  | 3.53348800  |

**Product 6c**

E=-1284,21024472

|   |             |             |             |
|---|-------------|-------------|-------------|
| C | 0.19241300  | -2.06865900 | -0.11885100 |
| C | -0.34953800 | -0.75418900 | -0.06699000 |
| C | 0.76364100  | 0.14744000  | -0.05471600 |
| H | 2.20953200  | -2.71889600 | -0.25346800 |
| H | 0.72442000  | 1.23149400  | 0.00265900  |
| C | 3.32541500  | -0.19544700 | -0.07388200 |
| C | 3.69759500  | 1.08229800  | -0.54661000 |
| C | 5.02109100  | 1.49642900  | -0.53592800 |
| H | 2.93255600  | 1.75086800  | -0.94681400 |
| C | 5.68405500  | -0.62992000 | 0.41955200  |
| H | 4.09863400  | -2.01509500 | 0.81847300  |
| C | 6.03311900  | 0.64382700  | -0.05455000 |
| H | 5.30884700  | 2.48175700  | -0.90771300 |
| H | 6.43972700  | -1.31138200 | 0.81017800  |
| C | -1.75956300 | -0.60740700 | -0.06334200 |
| C | -2.38442000 | 0.74224400  | -0.05336900 |
| C | -3.31997700 | 1.11222100  | -1.03716100 |
| C | -2.03945200 | 1.69051800  | 0.92684600  |
| C | -3.89941400 | 2.38231100  | -1.04297000 |
| H | -3.59085700 | 0.39831400  | -1.81859700 |
| C | -2.61214900 | 2.96355700  | 0.93481500  |
| H | -1.32651600 | 1.42014900  | 1.70877000  |

|   |             |             |             |
|---|-------------|-------------|-------------|
| C | -3.53687000 | 3.29308700  | -0.05356700 |
| H | -4.62123600 | 2.67798500  | -1.80691000 |
| H | -2.35755700 | 3.70135000  | 1.69834900  |
| C | -0.64800100 | -3.18441300 | -0.20147300 |
| H | -0.24990000 | -4.20509300 | -0.26297000 |
| N | -1.96287900 | -3.03512000 | -0.21109500 |
| C | -2.50141700 | -1.80228300 | -0.12758400 |
| C | -4.01143200 | -1.81456300 | -0.10737900 |
| O | -4.70637000 | -2.37327100 | -0.91816400 |
| O | -4.49931600 | -1.14341500 | 0.95414200  |
| C | -5.92028300 | -1.07387800 | 1.05415800  |
| H | -6.13621100 | -0.52076700 | 1.97668600  |
| H | -6.34760800 | -0.54680600 | 0.18692900  |
| H | -6.36050000 | -2.08148800 | 1.09852400  |
| C | 4.34538100  | -1.03188200 | 0.40900000  |
| C | 1.92083800  | -0.61622100 | -0.08330200 |
| N | 1.56277400  | -1.95505200 | -0.10862500 |
| F | -4.08876500 | 4.51612800  | -0.05320400 |
| O | 7.29402000  | 1.13432900  | -0.08877400 |
| C | 8.36273500  | 0.33632800  | 0.37143500  |
| H | 8.46009700  | -0.59611000 | -0.21326500 |
| H | 9.27563700  | 0.93302900  | 0.24392500  |
| H | 8.25127700  | 0.07720700  | 1.43969000  |

### Mechanism 3 (leading to product 6a)

#### INT2-3

E= -1246,08003089

|   |             |             |             |
|---|-------------|-------------|-------------|
| C | 0.69006500  | -0.29738400 | 0.21381800  |
| C | -0.69070400 | -0.38469200 | -0.05526700 |
| C | -1.15963800 | 0.95576400  | -0.18349700 |
| H | 1.96404200  | 1.31707000  | 0.46947100  |
| H | -2.16500400 | 1.26500000  | -0.45477500 |
| C | -0.00369000 | 3.27948300  | -0.05115500 |
| C | 1.22419300  | 3.94521100  | -0.23831200 |
| C | -1.17033000 | 4.06003800  | 0.07498400  |
| C | 1.28283300  | 5.33870500  | -0.29099300 |
| H | 2.14539100  | 3.37205800  | -0.36996500 |
| C | -1.11000700 | 5.45169800  | 0.01401700  |
| H | -2.13194100 | 3.56911100  | 0.23879100  |
| C | 0.11693500  | 6.09957000  | -0.16636000 |
| H | 2.24650500  | 5.83218500  | -0.44038600 |
| H | -2.02775400 | 6.03642200  | 0.11645800  |
| C | -1.42425700 | -1.65849800 | -0.23156600 |
| C | -2.92467800 | -1.68216600 | -0.13170100 |
| C | -3.66381900 | -0.80824600 | 0.68423700  |
| C | -3.60679800 | -2.69317600 | -0.83381300 |
| C | -5.05159200 | -0.92644700 | 0.78550600  |
| H | -3.15188100 | -0.04609400 | 1.27323300  |
| C | -4.99188100 | -2.81096700 | -0.75735500 |
| H | -3.02217100 | -3.38776800 | -1.43982100 |
| C | -5.69700100 | -1.92103700 | 0.05407300  |
| H | -5.63890000 | -0.26582200 | 1.42614100  |



|   |             |             |             |
|---|-------------|-------------|-------------|
| H | -5.53648700 | -3.58082600 | -1.30751900 |
| O | -0.82650700 | -2.70124600 | -0.47066500 |
| C | 1.71565000  | -1.30036000 | 0.45404100  |
| H | 1.40649800  | -2.35130400 | 0.33411700  |
| N | 2.89798700  | -0.92977300 | 0.76984300  |
| H | 3.53209400  | -2.97472500 | 0.86064500  |
| C | -0.07843300 | 1.81629000  | 0.00686000  |
| N | 1.01584200  | 1.02445400  | 0.25181800  |
| C | 3.90360100  | -1.93410200 | 0.97549100  |
| H | 4.31421100  | -1.85805100 | 1.99759000  |
| C | 5.07128500  | -1.76642000 | 0.00858800  |
| O | 5.07412500  | -1.09323500 | -0.98766200 |
| O | 6.11432600  | -2.51734800 | 0.41310800  |
| C | 7.26458200  | -2.50748700 | -0.43243800 |
| H | 7.67666000  | -1.49071200 | -0.52132400 |
| H | 7.99744400  | -3.17431300 | 0.03849800  |
| H | 7.01314100  | -2.86887200 | -1.44135800 |
| F | -7.02836800 | -2.03184200 | 0.13841100  |
| H | 0.16322000  | 7.19041500  | -0.21032000 |

**TS4-3 (assisted by 2 EtOH)**

E= -1401,1468803

|   |             |             |             |
|---|-------------|-------------|-------------|
| C | 1.41212800  | -0.73647500 | -1.52123600 |
| C | 0.91119100  | -0.17779300 | -0.34878500 |
| C | 2.02280400  | 0.21995100  | 0.43938100  |
| H | 3.40582700  | -0.96596900 | -2.20101200 |
| H | 1.99058900  | 0.67054000  | 1.42825400  |
| C | 4.59062100  | 0.04137200  | 0.10235100  |
| C | 4.97820900  | 0.98893000  | 1.07307900  |
| C | 6.31669200  | 1.14385400  | 1.43025900  |
| H | 4.21880900  | 1.62297800  | 1.53540800  |
| C | 6.94220700  | -0.57608600 | -0.14301500 |
| H | 5.33784800  | -1.51044900 | -1.22522100 |
| C | 7.30877400  | 0.36573100  | 0.82238900  |
| H | 6.59045100  | 1.88780700  | 2.18299300  |
| H | 7.70494300  | -1.19706900 | -0.62021900 |
| C | -0.57004900 | -0.01550300 | -0.11592300 |
| C | -0.92375200 | 1.47869600  | -0.05762100 |
| C | -1.18932100 | 2.16509100  | -1.25315900 |
| C | -0.88835300 | 2.21195400  | 1.13815700  |
| C | -1.42504400 | 3.54036600  | -1.26090200 |
| H | -1.21316400 | 1.61563300  | -2.19697400 |
| C | -1.12671500 | 3.58896500  | 1.14729900  |
| H | -0.68561800 | 1.70599300  | 2.08263900  |
| C | -1.39154900 | 4.23683300  | -0.05513700 |
| H | -1.63678200 | 4.07876700  | -2.18683200 |
| H | -1.11244000 | 4.16366500  | 2.07551400  |
| O | -0.81803200 | -0.60240800 | 1.23627100  |
| C | 0.55603400  | -1.22841000 | -2.56920900 |
| H | 0.97201500  | -1.60492000 | -3.51396200 |
| N | -0.72499900 | -1.24288100 | -2.40292100 |
| C | -1.32819500 | -0.82543200 | -1.21736300 |
| C | -2.77728900 | -0.63340500 | -1.28782000 |

|   |             |             |             |
|---|-------------|-------------|-------------|
| O | -3.48416800 | -0.18031800 | -0.38019800 |
| O | -3.34357800 | -1.04280000 | -2.43568200 |
| C | -4.76010200 | -0.95268600 | -2.51438500 |
| H | -5.03045500 | -1.30701800 | -3.51761500 |
| H | -5.24561900 | -1.58189800 | -1.75113400 |
| H | -5.10414000 | 0.08354300  | -2.37336400 |
| C | 5.60124000  | -0.74098100 | -0.49438900 |
| C | 3.18113900  | -0.11656800 | -0.26080300 |
| N | 2.78198500  | -0.70338700 | -1.44934300 |
| H | -1.34594400 | -2.19743000 | -0.44183200 |
| O | -1.19912500 | -2.83248400 | 0.46872000  |
| H | -0.94751400 | -1.88650200 | 1.03327500  |
| C | -0.11913500 | -3.78268600 | 0.35225100  |
| H | -0.37618900 | -4.45513200 | -0.48055500 |
| H | 0.80910200  | -3.24919800 | 0.08770200  |
| C | 0.03665400  | -4.55249400 | 1.64918700  |
| H | -0.89597800 | -5.07620800 | 1.90955300  |
| H | 0.83886500  | -5.30088900 | 1.55011800  |
| H | 0.30226200  | -3.88024700 | 2.48048200  |
| F | -1.62153300 | 5.56006000  | -0.05370000 |
| H | -1.68491400 | -0.27987800 | 1.64888100  |
| H | -3.42654900 | 0.13233500  | 1.25394700  |
| O | -3.15030400 | 0.06481000  | 2.20342000  |
| C | -3.87058000 | -1.00614900 | 2.80152900  |
| H | -3.47322300 | -1.12162200 | 3.82374200  |
| H | -3.67181800 | -1.95592500 | 2.26648300  |
| C | -5.36670200 | -0.73209600 | 2.84418400  |
| H | -5.77152800 | -0.63343900 | 1.82387500  |
| H | -5.90193300 | -1.55468800 | 3.34610500  |
| H | -5.57387400 | 0.20317400  | 3.38736900  |
| H | 8.35805900  | 0.49310000  | 1.09937000  |

### Product 6a

E= -1169,63136454

|   |             |             |             |
|---|-------------|-------------|-------------|
| C | 1.01602100  | -1.95460400 | -0.09680700 |
| C | 0.39920300  | -0.67365000 | -0.04853700 |
| C | 1.45896100  | 0.28988300  | -0.02150800 |
| H | 3.06838200  | -2.49016100 | -0.20134900 |
| H | 1.35772600  | 1.36988000  | 0.03663700  |
| C | 4.03669300  | 0.09427100  | -0.00621800 |
| C | 4.33579700  | 1.38659300  | -0.48083300 |
| C | 5.64213300  | 1.87332100  | -0.44839000 |
| H | 3.53701300  | 2.00390100  | -0.89707900 |
| C | 6.39851900  | -0.20489400 | 0.52493400  |
| H | 4.88479600  | -1.68446700 | 0.90936000  |
| C | 6.68044400  | 1.07959100  | 0.05153700  |
| H | 5.85372200  | 2.87705700  | -0.82542000 |
| H | 7.20030200  | -0.82964800 | 0.92650200  |
| C | -1.01697200 | -0.60616500 | -0.06205400 |
| C | -1.71726800 | 0.70586700  | -0.05555800 |
| C | -2.65994600 | 1.02579100  | -1.05003400 |
| C | -1.43904600 | 1.66798300  | 0.93236800  |
| C | -3.31041900 | 2.26093000  | -1.05896700 |

|   |             |             |             |
|---|-------------|-------------|-------------|
| H | -2.88011100 | 0.30080200  | -1.83716900 |
| C | -2.08331400 | 2.90631700  | 0.93727500  |
| H | -0.72219600 | 1.43529700  | 1.72282000  |
| C | -3.01269100 | 3.18677300  | -0.06188600 |
| H | -4.03825200 | 2.51823800  | -1.83102300 |
| H | -1.88098900 | 3.65415500  | 1.70663000  |
| C | 0.24078300  | -3.11648100 | -0.19319600 |
| H | 0.69651100  | -4.11283700 | -0.25245400 |
| N | -1.07942900 | -3.04076400 | -0.21881400 |
| C | -1.68867400 | -1.84051800 | -0.13885700 |
| C | -3.19589100 | -1.93856500 | -0.13891300 |
| O | -3.84665500 | -2.52908900 | -0.96353800 |
| O | -3.73419200 | -1.30487300 | 0.92073200  |
| C | -5.15819900 | -1.31726900 | 1.00348700  |
| H | -5.41637400 | -0.78351200 | 1.92651200  |
| H | -5.60426500 | -0.80980400 | 0.13406200  |
| H | -5.54030500 | -2.34870700 | 1.03654800  |
| C | 5.09036300  | -0.69173600 | 0.50040600  |
| C | 2.65707400  | -0.40718400 | -0.03679900 |
| N | 2.37694000  | -1.76400000 | -0.06867000 |
| F | -3.63303400 | 4.37623200  | -0.06450800 |
| H | 7.70411400  | 1.46123100  | 0.07212800  |

## References

- S1. I. V. Efimov, M. D. Matveeva, R. Luque, V. A. Bakulev, L. G. Voskressensky, *Eur. J. Org. Chem.* **2020**, *9*, 1108–1113.
- S2. Gaussian 16, Revision C.01, Frisch, M. J.; Trucks, G. W.; Schlegel, H. B.; Scuseria, G. E.; Robb, M. A.; Cheeseman, J. R.; Scalmani, G.; Barone, V.; Petersson, G. A.; Nakatsuji, H.; Li, X.; Caricato, M.; Marenich, A. V.; Bloino, J.; Janesko, B. G.; Gomperts, R.; Mennucci, B.; Hratchian, H. P.; Ortiz, J. V.; Izmaylov, A. F.; Sonnenberg, J. L.; Williams-Young, D.; Ding, F.; Lipparini, F.; Egidi, F.; Goings, J.; Peng, B.; Petrone, A.; Henderson, T.; Ranasinghe, D.; Zakrzewski, V. G.; Gao, J.; Rega, N.; Zheng, G.; Liang, W.; Hada, M.; Ehara, M.; Toyota, K.; Fukuda, R.; Hasegawa, J.; Ishida, M.; Nakajima, T.; Honda, Y.; Kitao, O.; Nakai, H.; Vreven, T.; Throssell, K.; Montgomery, J. A., Jr.; Peralta, J. E.; Ogliaro, F.; Bearpark, M. J.; Heyd, J. J.; Brothers, E. N.; Kudin, K. N.; Staroverov, V. N.; Keith, T. A.; Kobayashi, R.; Normand, J.; Raghavachari, K.; Rendell, A. P.; Burant, J. C.; Iyengar, S. S.; Tomasi, J.; Cossi, M.; Millam, J. M.; Klene, M.; Adamo, C.; Cammi, R.; Ochterski, J. W.; Martin, R. L.; Morokuma, K.; Farkas, O.; Foresman, J. B.; Fox, D. J. Gaussian, Inc., Wallingford CT, 2016.
- S3. C. Lee, W. Yang, R. G. Parr. Development of the Colle-Salvetti Correlation-Energy Formula into a Functional of the Electron Density. *Phys. Rev. B* **1988**, *37*, 785-789.
- S4. (a) A. D. Becke. A New Mixing of Hartree-Fock and Local Density-Functional Theories. *J. Chem. Phys.* **1993**, *98*, 1372-1377; (b) A. D. Becke. Density-Functional Thermochemistry. III. The Role of Exact Exchange. *J. Chem. Phys.* **1993**, *98*, 5648-5652.
- S5. A. Schäfer, H. Horn, R. Ahlrichs. Fully optimized contracted Gaussian basis sets for atoms Li to Kr. *J. Chem. Phys.* **1992**, *97*, 2571-2577.
- S6. F. Weigend, R. Ahlrichs. Balanced basis sets of split valence, triple zeta valence and quadruple zeta valence quality for H to Rn: Design and assessment of accuracy *Phys. Chem. Chem. Phys.* **2005**, *7*, 3297-3305.
- S7. F. Weigend. Accurate Coulomb-fitting basis sets for H to Rn. *Phys. Chem. Chem. Phys.* **2006**, *8*, 1057-1065
- S8. V. Barone, M. Cossi. Quantum Calculation of Molecular Energies and Energy Gradients in Solution by a Conductor Solvent Model. *J. Phys. Chem. A* **1998**, *102*, 1995-2001.
- S9. (a) S. Grimme, J. Antony, S. Ehrlich, H. Krieg. A Consistent and Accurate Ab Initio Parametrization of Density Functional Dispersion Correction (DFT-D) for the 94 Elements H-Pu. *J. Chem. Phys.* **2010**, *132*, 154104; (b) S. Grimme, Accurate Description of van der Waals Complexes by Density Functional Theory Including Empirical Corrections. *J. Comput. Chem.* **2004**, *12*, 1463-1473.
